# Supplementary material for: Ambiphilic boron in 1,4,2,5-diazadiborinine
Source: PubMed Central journal article supplement (PMC4906229; doi:10.1038/ncomms11871), 2016-06-09
Supplement: ncomms11871-s1.pdf [file ncomms11871-s1.pdf]

## Supplementary Figures

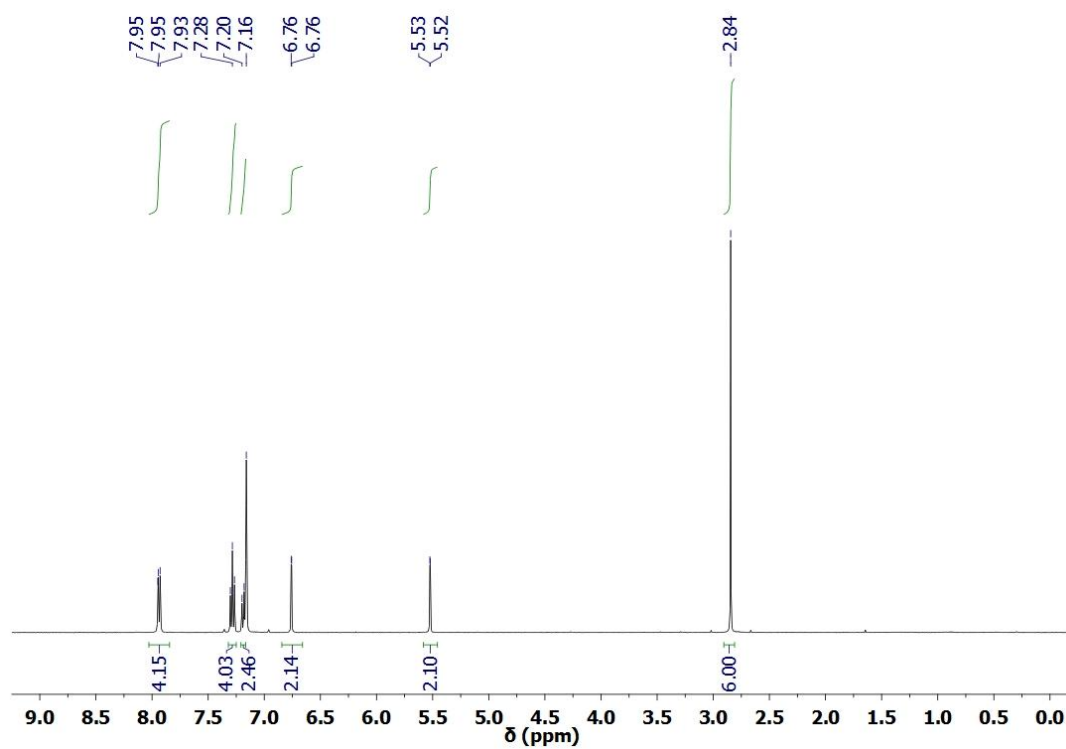

Supplementary Figure 1 |  $^1\text{H}$  NMR spectrum ( $\text{C}_6\text{D}_6$ ) of **1**.

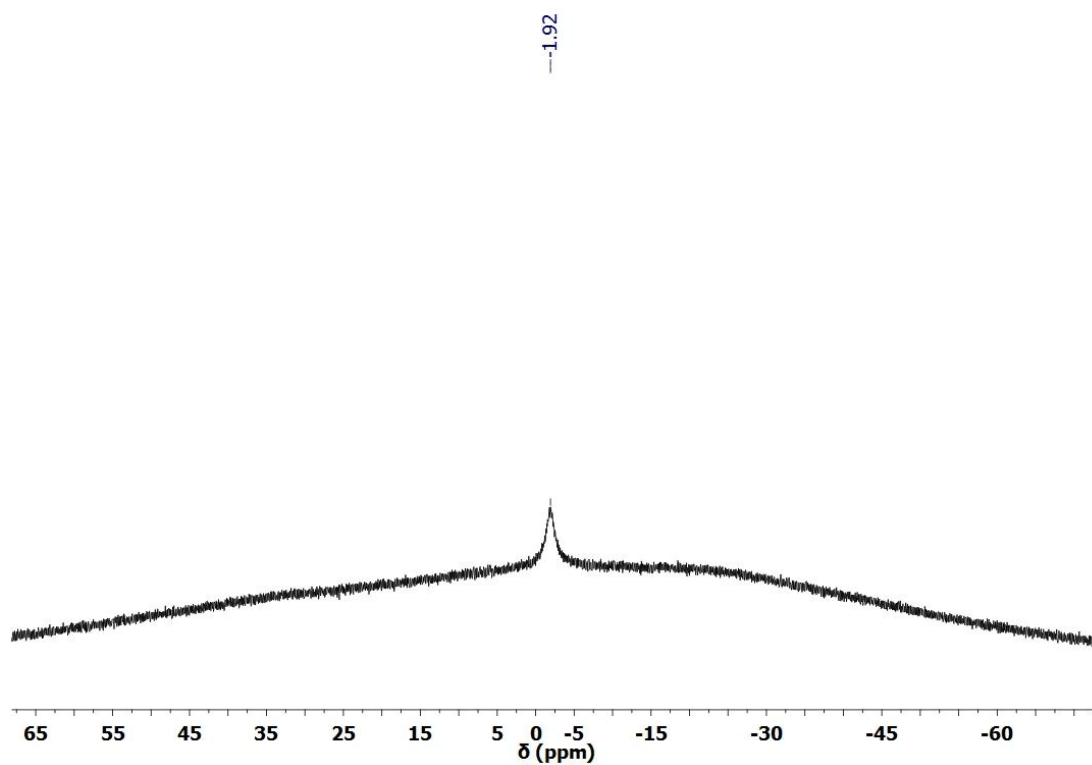

Supplementary Figure 2 |  $^{11}\text{B}\{^1\text{H}\}$  NMR spectrum ( $\text{C}_6\text{D}_6$ ) of **1**.

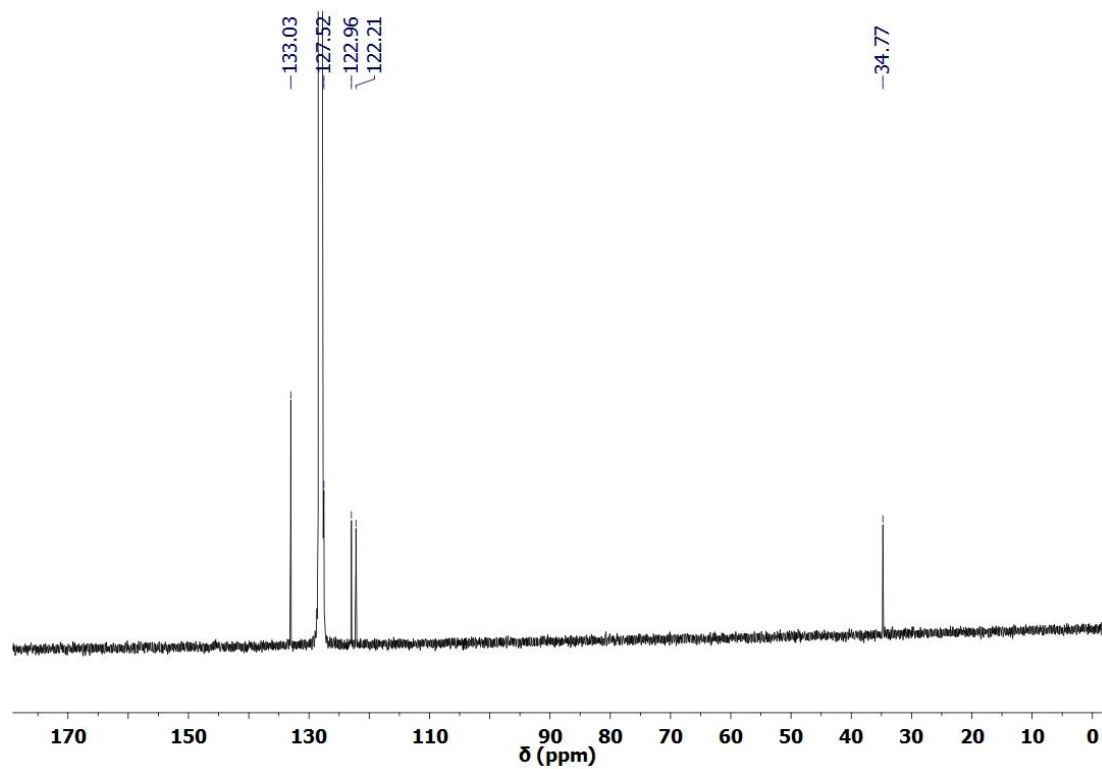

Supplementary Figure 3 |  $^{13}\text{C}$  NMR spectrum (C<sub>6</sub>D<sub>6</sub>) of **1**.

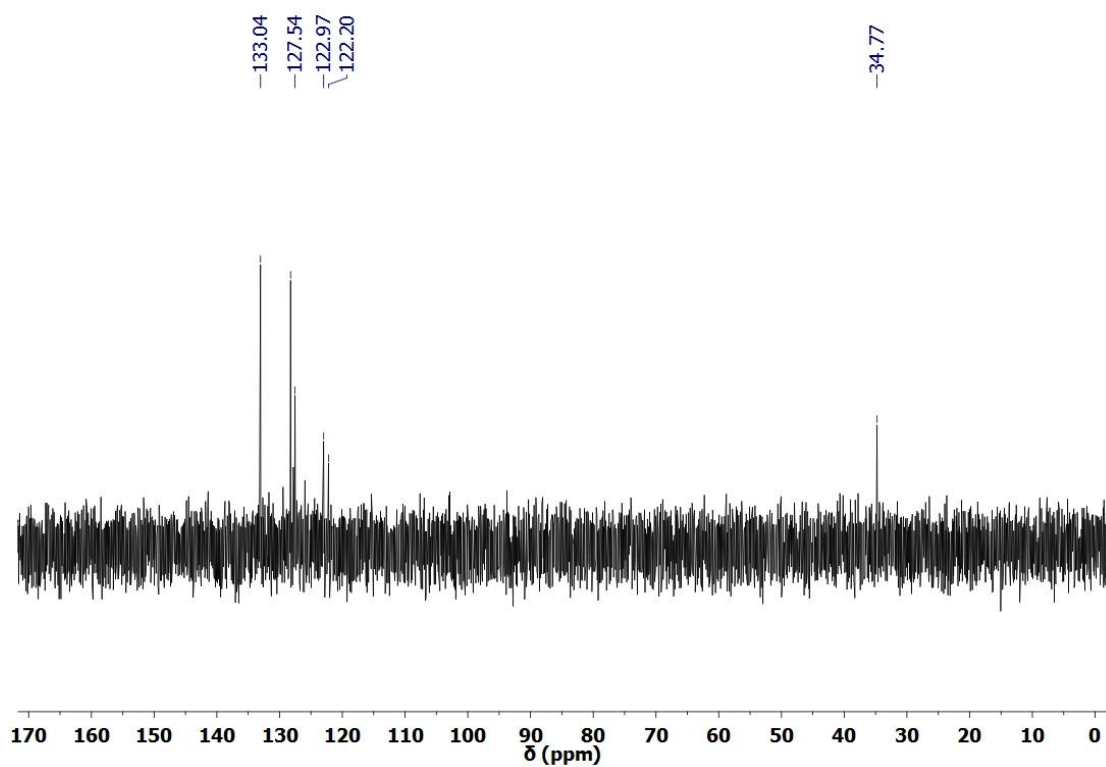

Supplementary Figure 4 |  $^{13}\text{C}$  NMR (DEPT135) spectrum (C<sub>6</sub>D<sub>6</sub>) of **1**.

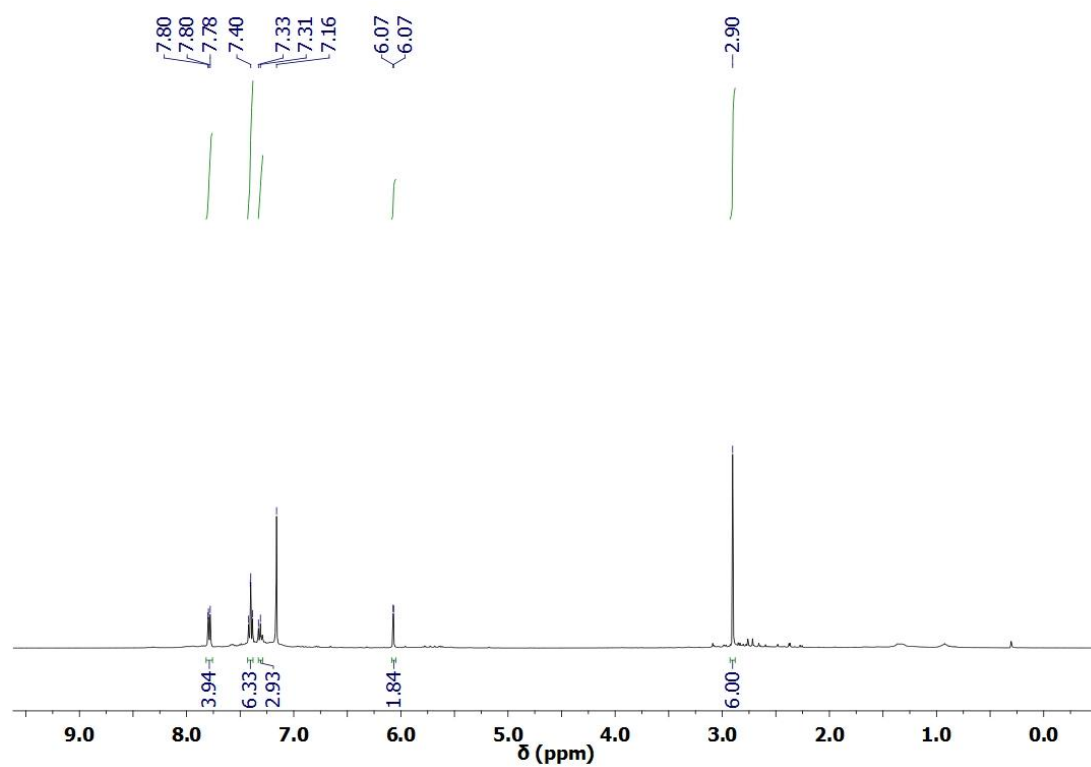

Supplementary Figure 5 |  $^1\text{H}$  NMR spectrum ( $\text{C}_6\text{D}_6$ ) of **2**.

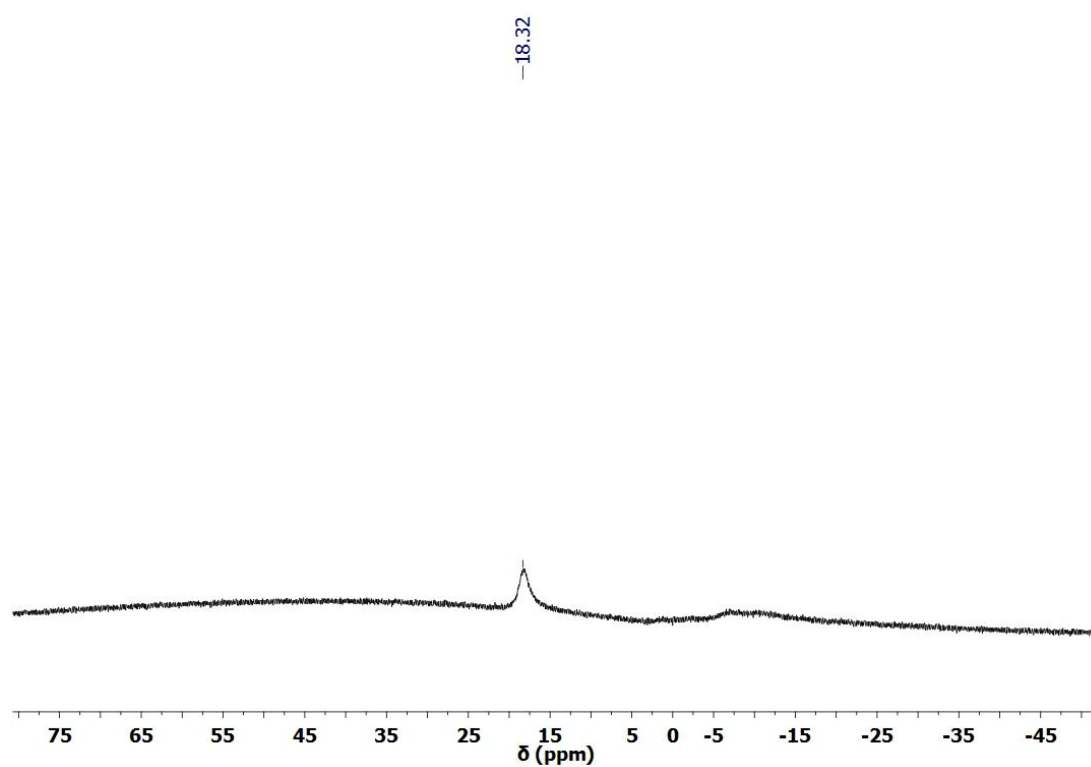

Supplementary Figure 6 |  $^{11}\text{B}\{^1\text{H}\}$  NMR spectrum ( $\text{C}_6\text{D}_6$ ) of **2**.

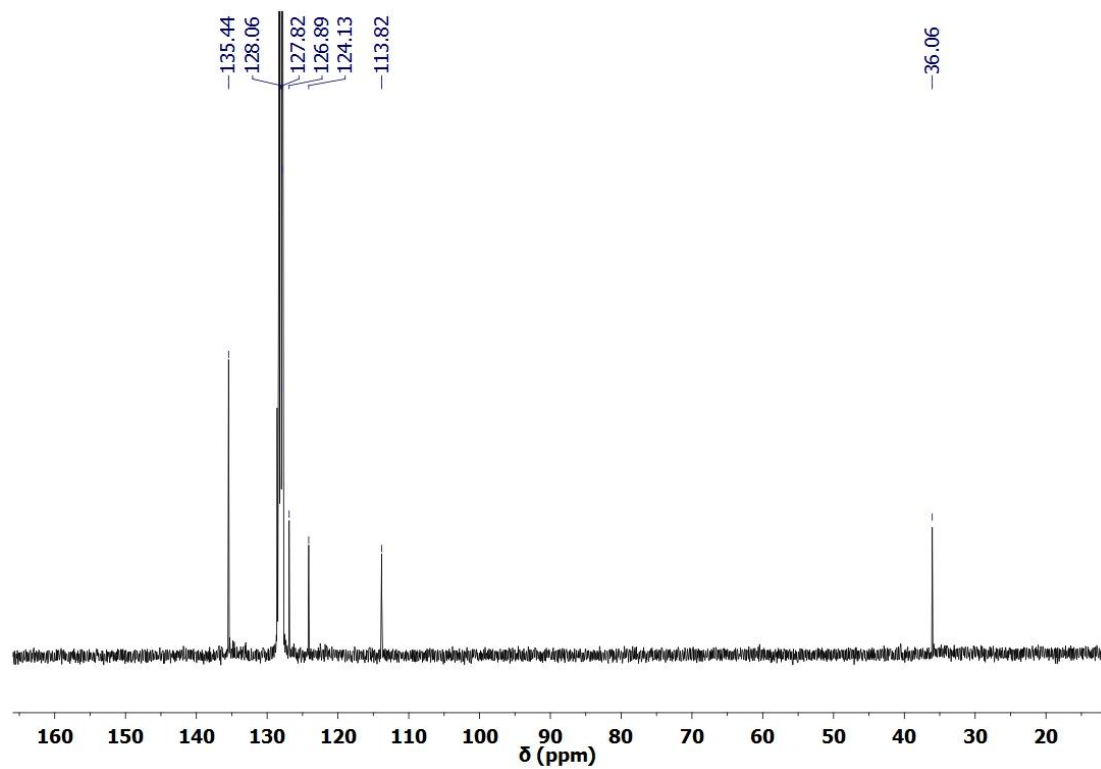

Supplementary Figure 7 |  $^{13}\text{C}$  NMR spectrum ( $\text{C}_6\text{D}_6$ ) of **2**.

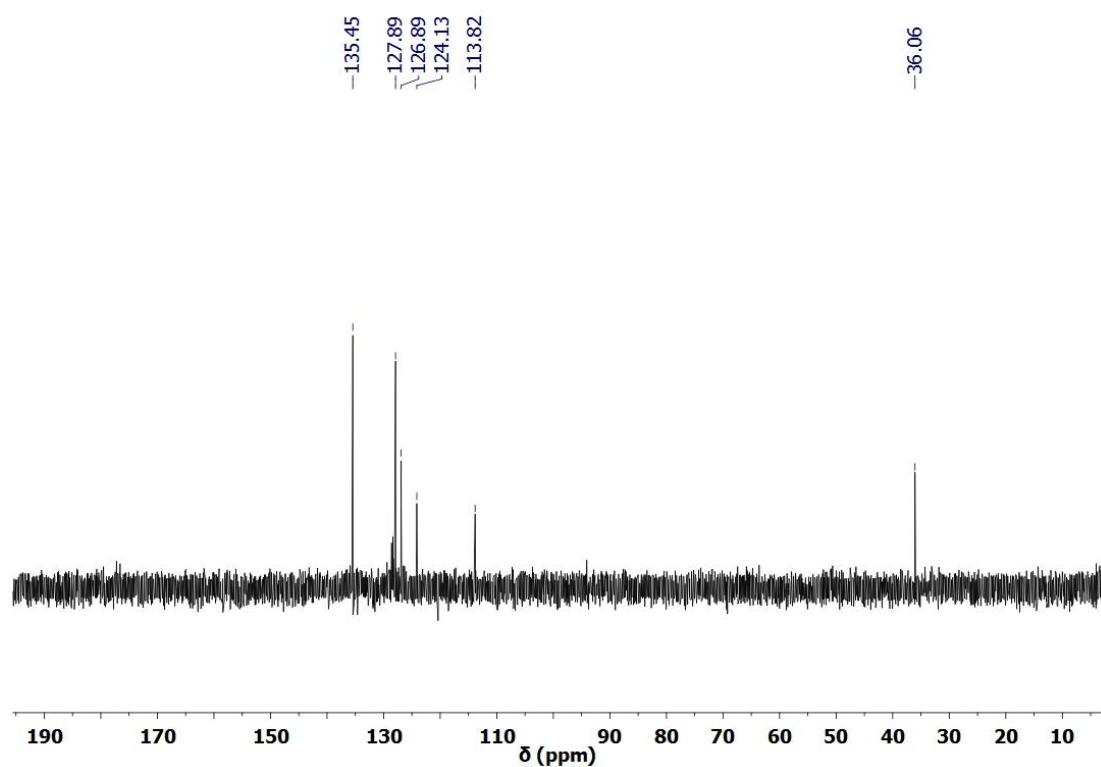

Supplementary Figure 8 |  $^{13}\text{C}$  NMR (DEPT135) spectrum ( $\text{C}_6\text{D}_6$ ) of **2**.

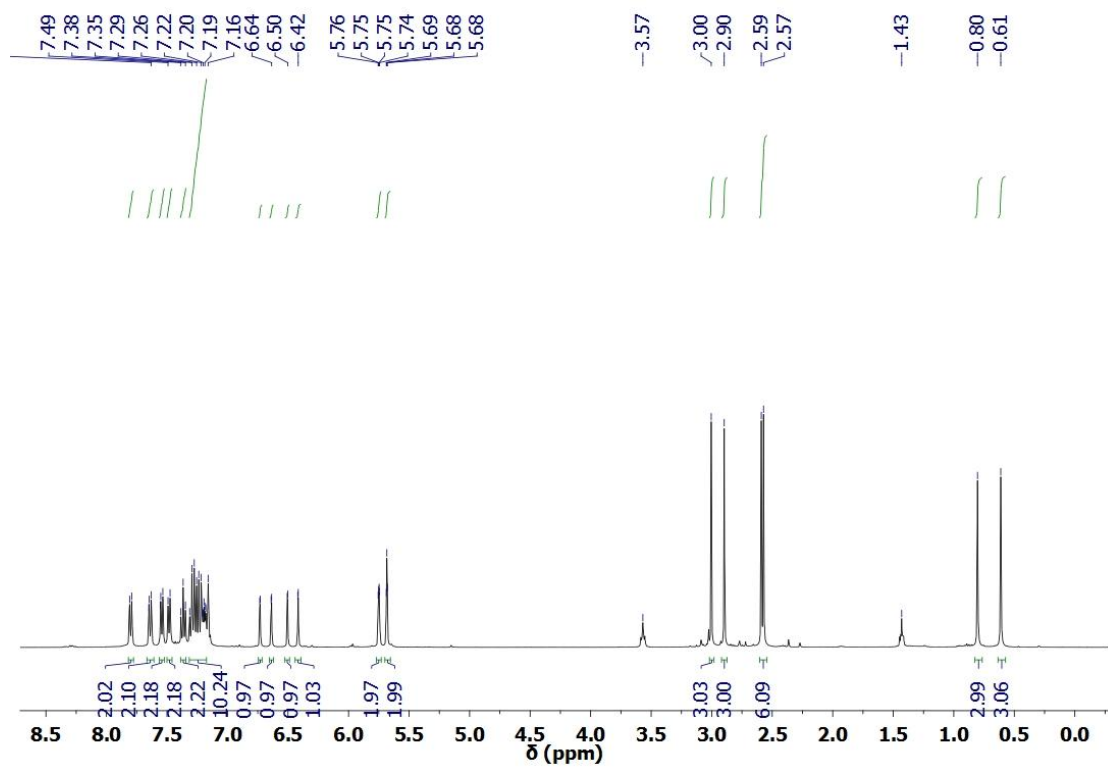

Supplementary Figure 9 |  $^1\text{H}$  NMR spectrum ( $\text{C}_6\text{D}_6$ ) of **3**.

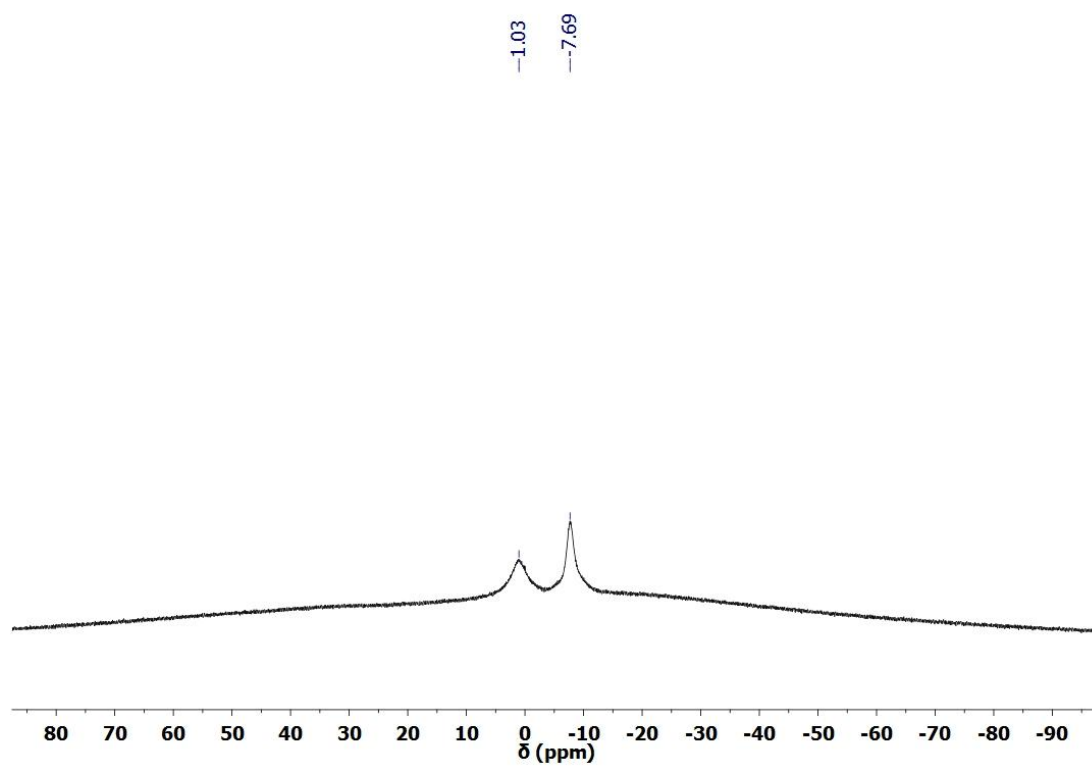

Supplementary Figure 10 |  $^{11}\text{B}\{^1\text{H}\}$  NMR spectrum ( $\text{C}_6\text{D}_6$ ) of **3**.

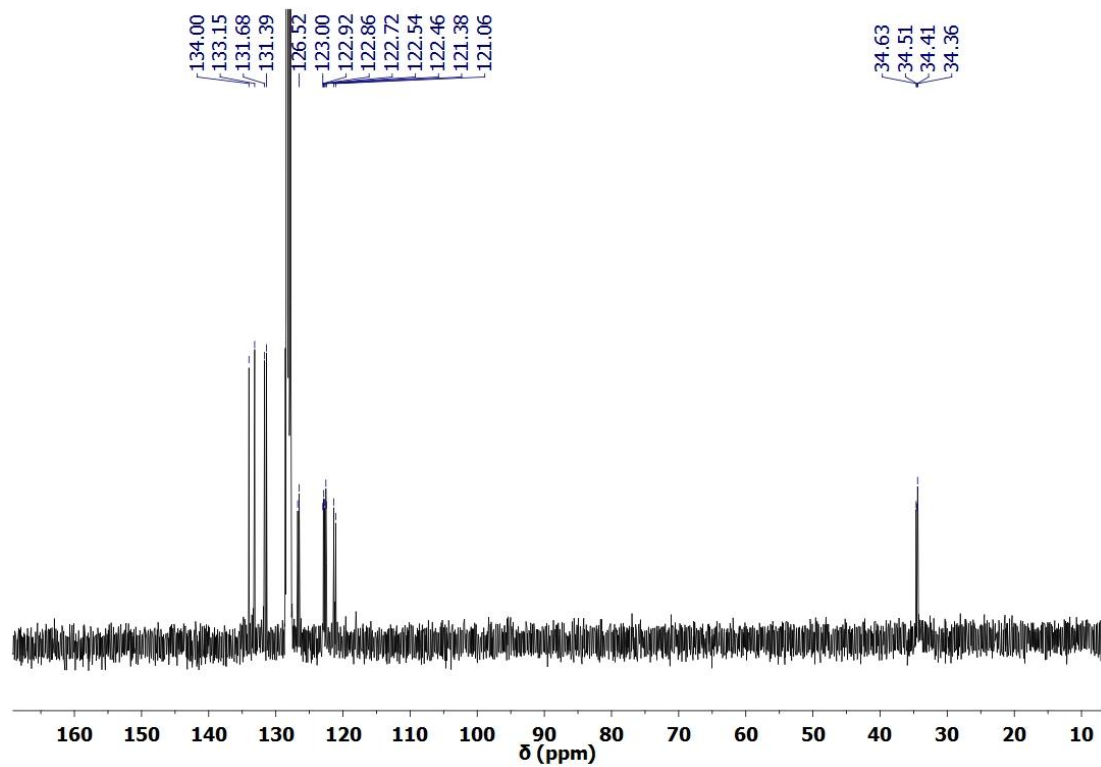

Supplementary Figure 11 |  $^{13}\text{C}$  NMR spectrum ( $\text{C}_6\text{D}_6$ ) of **3**.

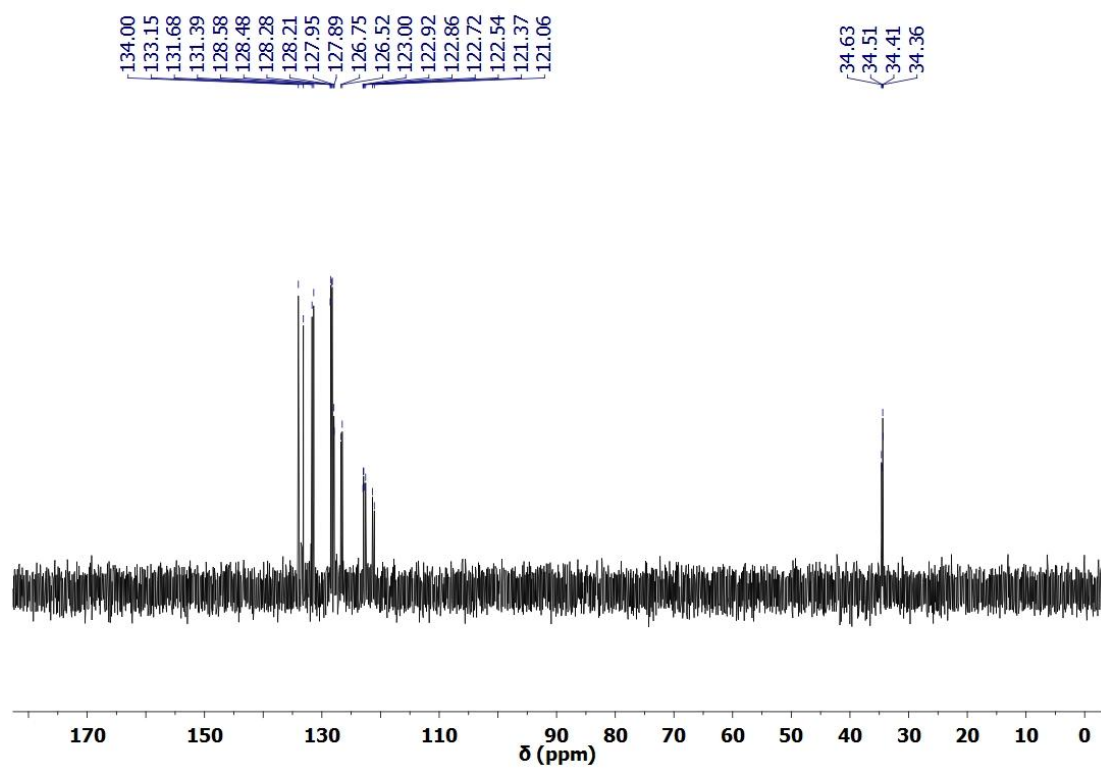

Supplementary Figure 12 |  $^{13}\text{C}$  NMR (DEPT135) spectrum ( $\text{C}_6\text{D}_6$ ) of **3**.

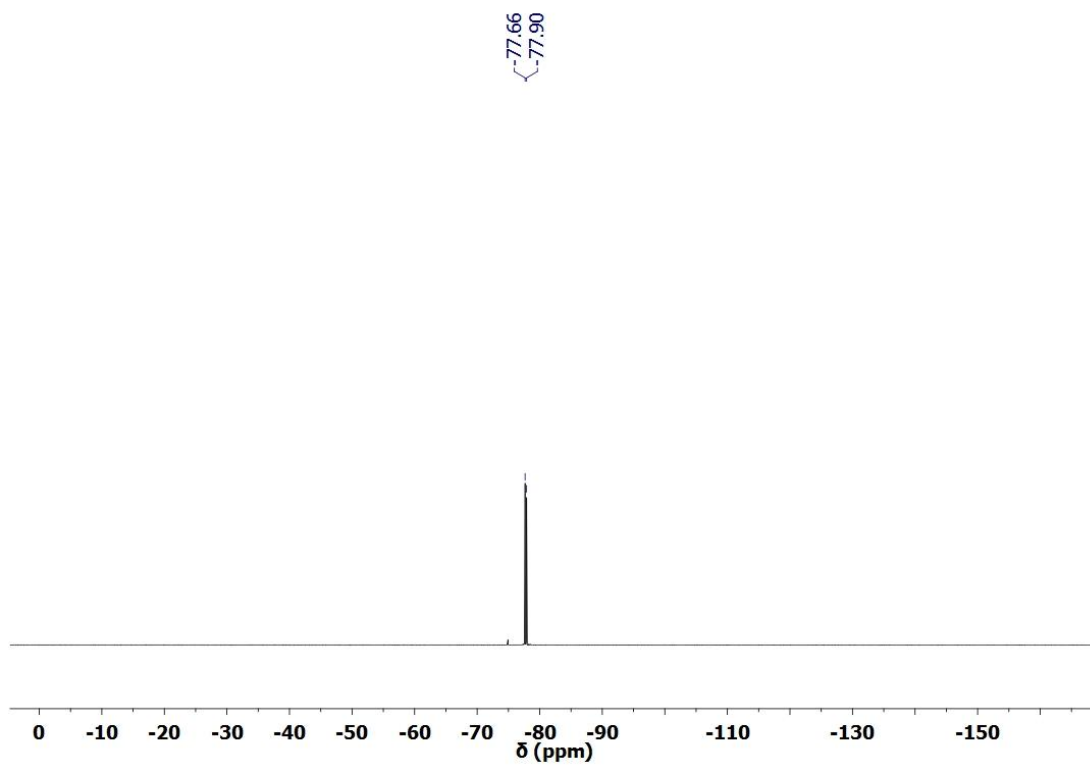

Supplementary Figure 13 |  $^{19}\text{F}$  NMR spectrum ( $\text{C}_6\text{D}_6$ ) of **3**.

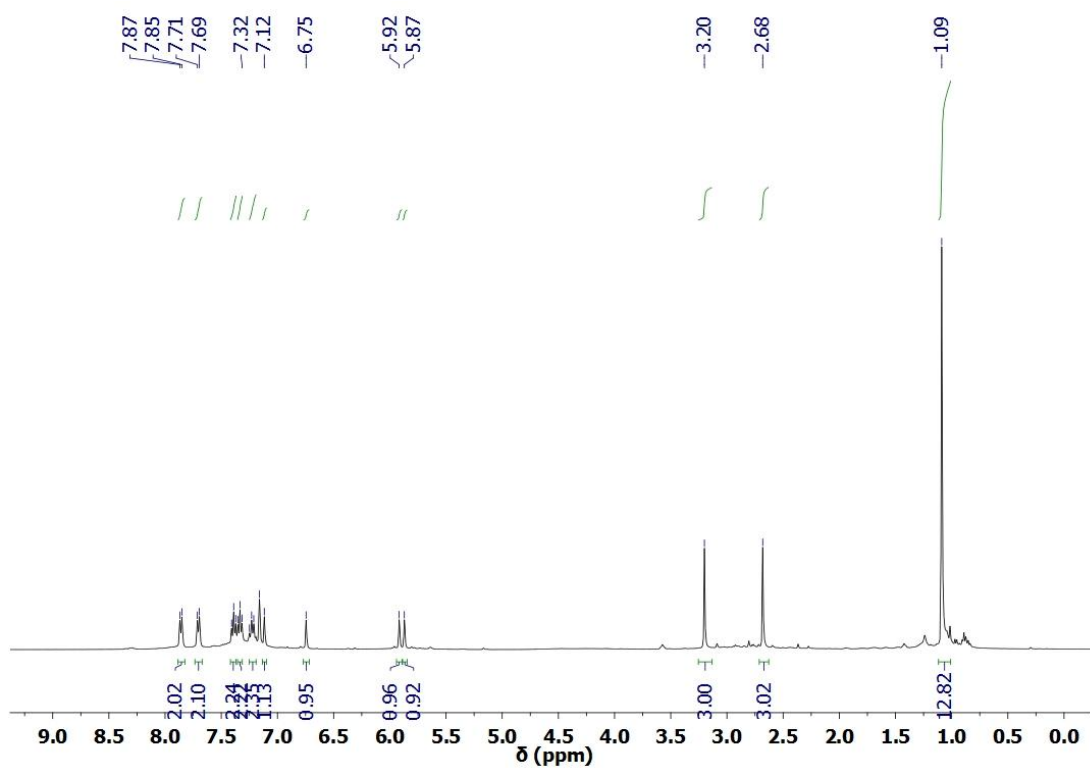

Supplementary Figure 14 |  $^1\text{H}$  NMR spectrum ( $\text{C}_6\text{D}_6$ ) of **4**.

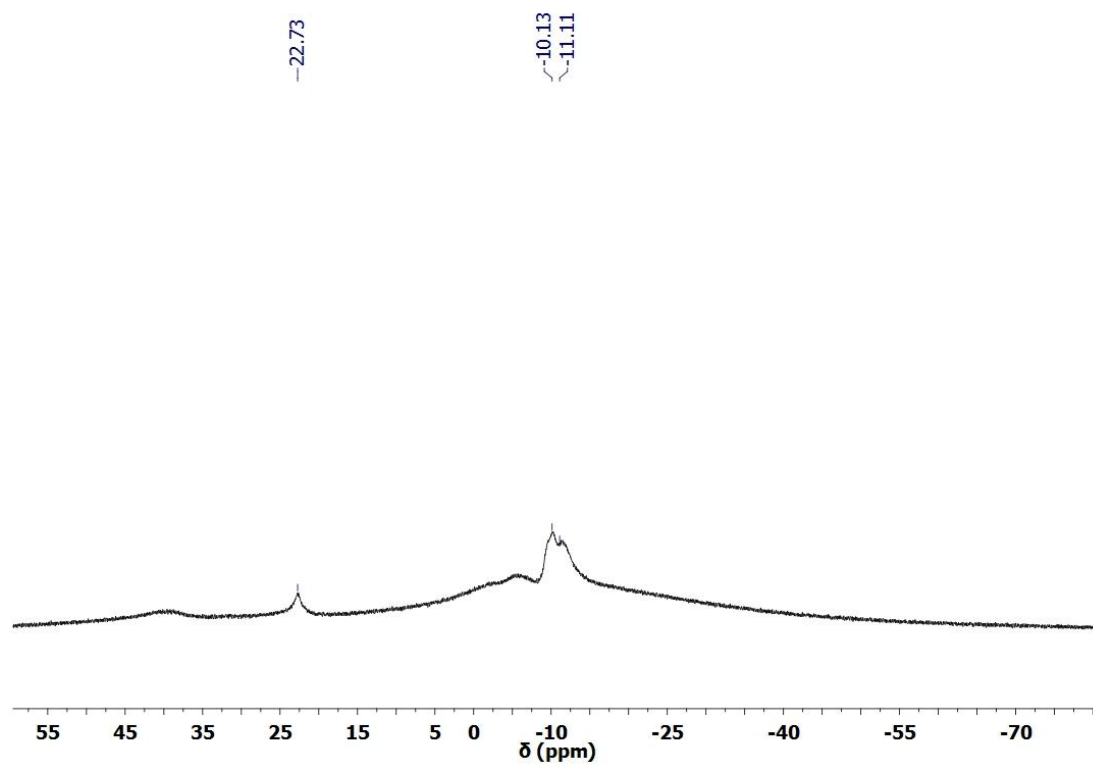

Supplementary Figure 15 |  $^{11}\text{B}\{^1\text{H}\}$  NMR spectrum ( $\text{C}_6\text{D}_6$ ) of 4.

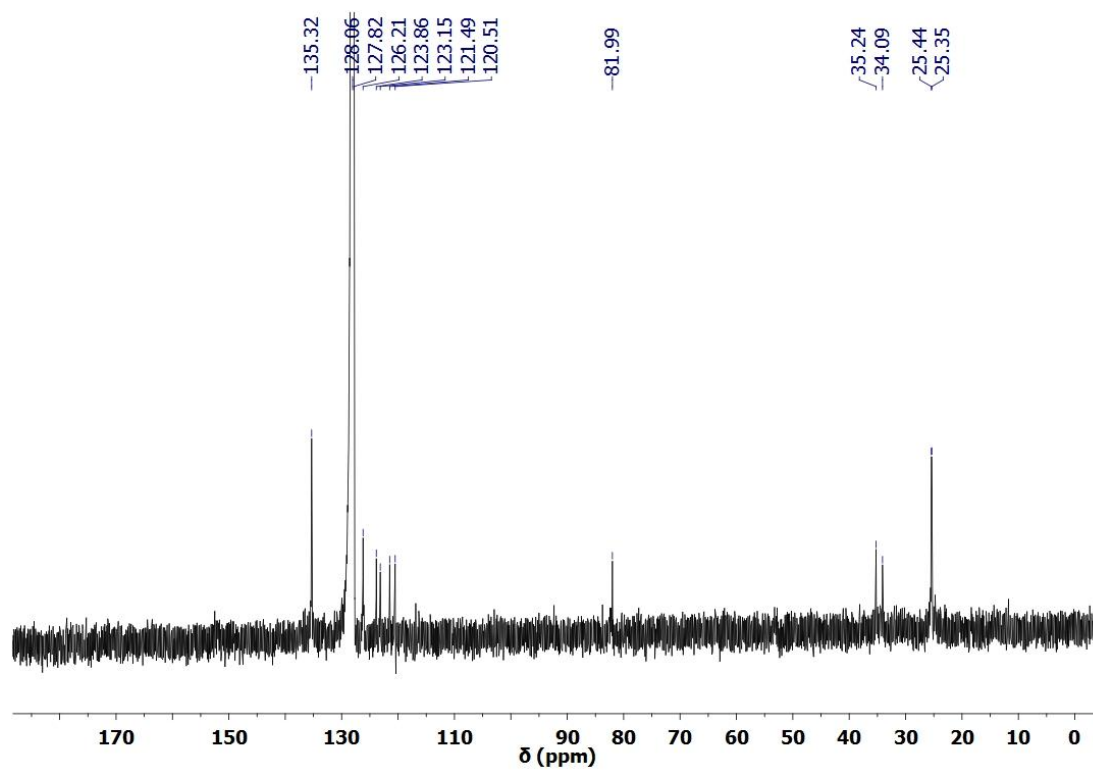

Supplementary Figure 16 |  $^{13}\text{C}$  NMR spectrum ( $\text{C}_6\text{D}_6$ ) of 4.



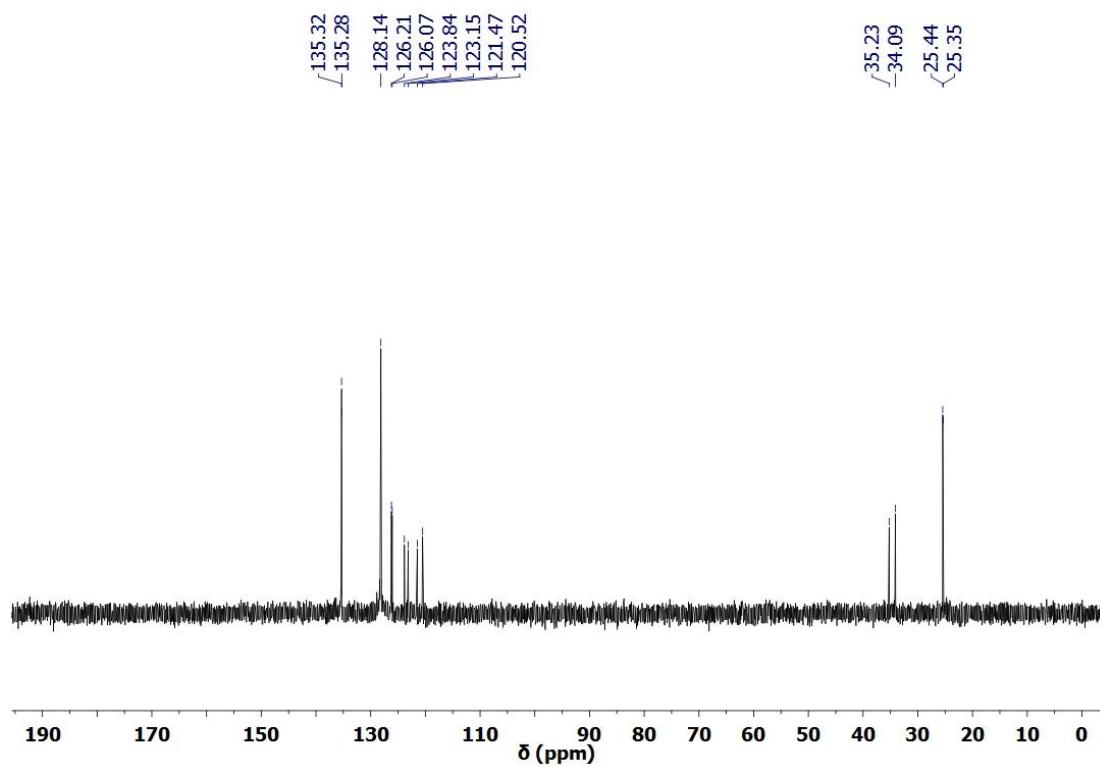

Supplementary Figure 17 |  $^{13}\text{C}$  NMR (DEPT135) spectrum ( $\text{C}_6\text{D}_6$ ) of **4**.

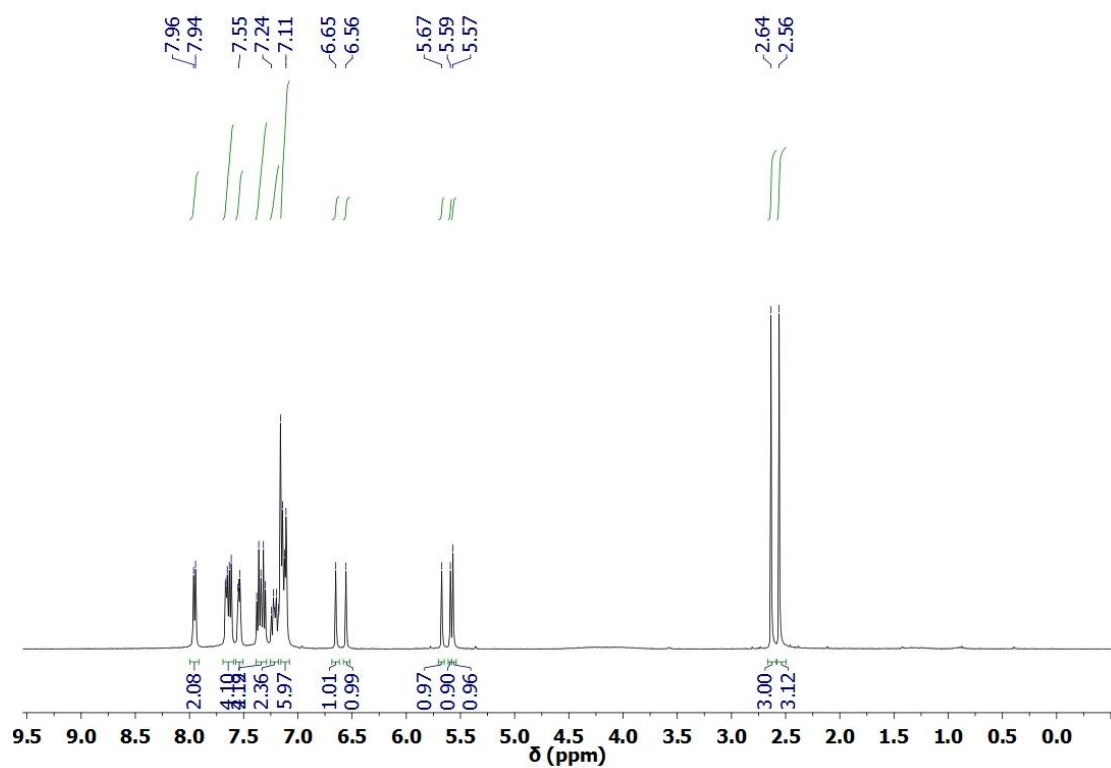

Supplementary Figure 18 |  $^1\text{H}$  NMR spectrum ( $\text{C}_6\text{D}_6$ ) of **5a**.

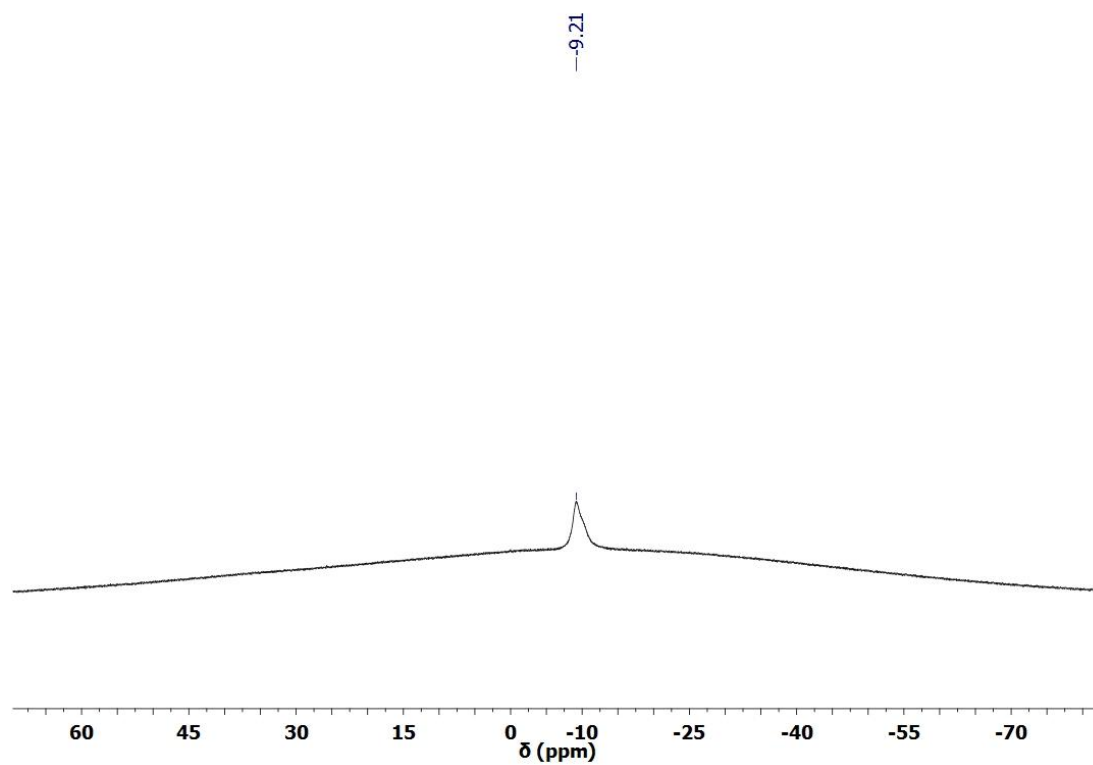

Supplementary Figure 19 | <sup>11</sup>B {<sup>1</sup>H} NMR spectrum (C<sub>6</sub>D<sub>6</sub>) of 5a.

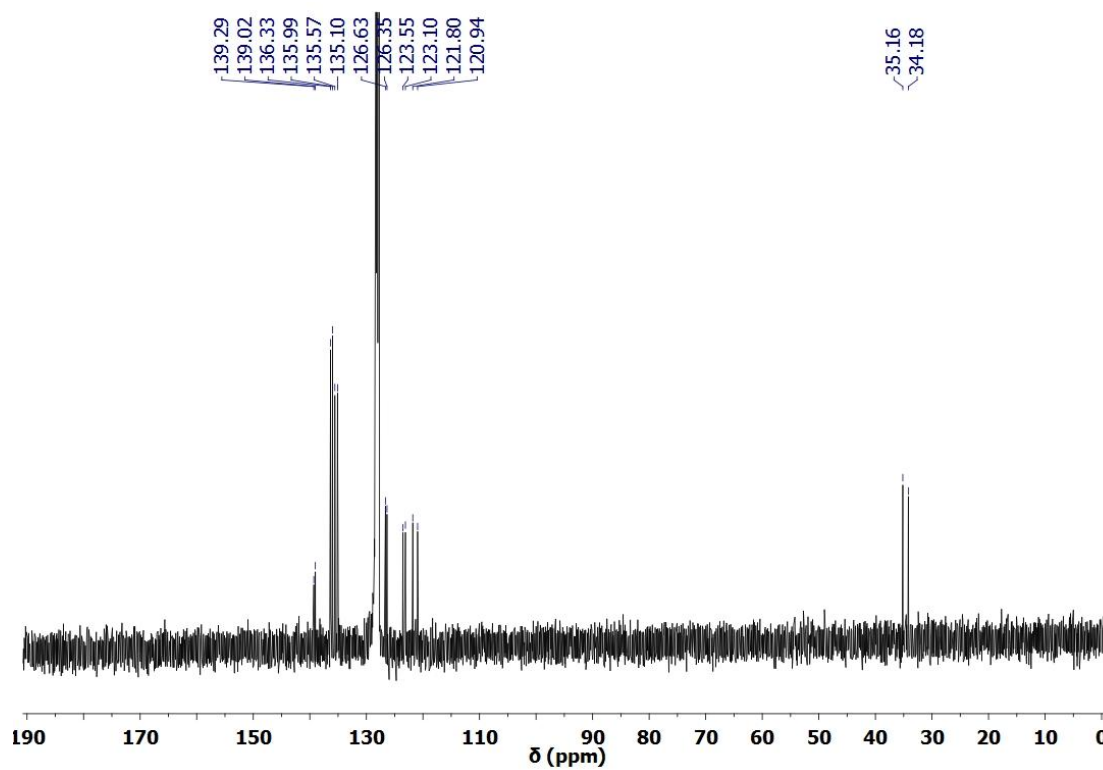

Supplementary Figure 20 | <sup>13</sup>C NMR spectrum (C<sub>6</sub>D<sub>6</sub>) of 5a.

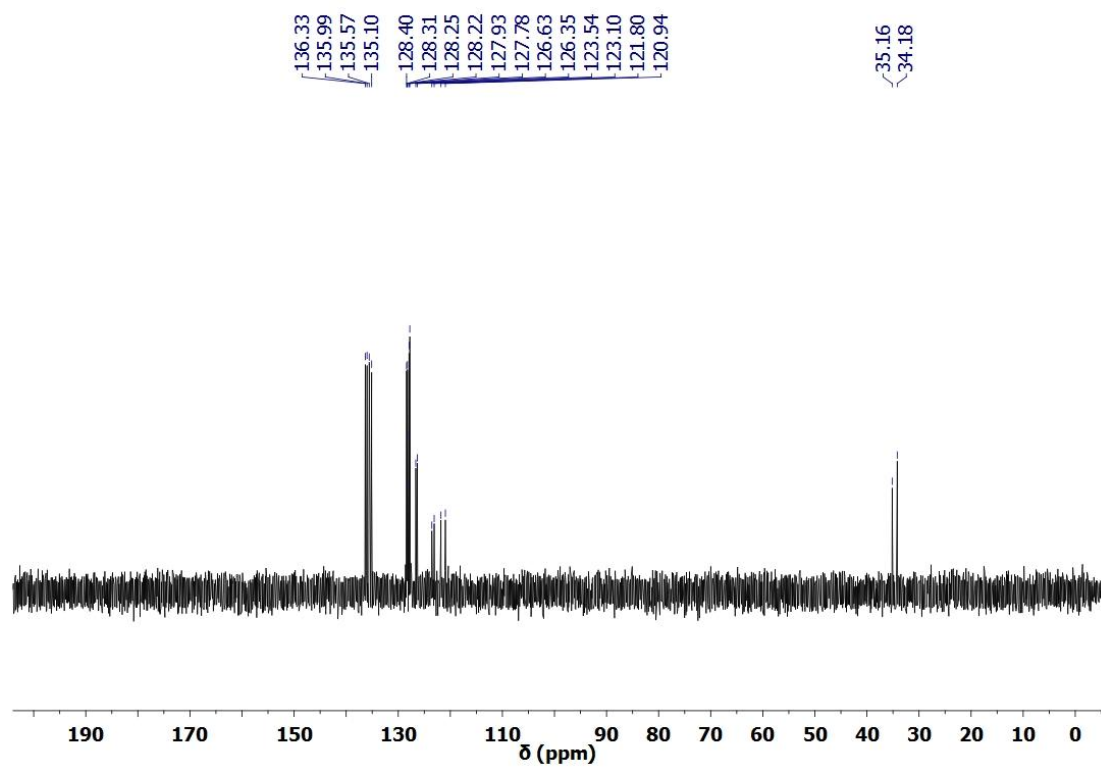

Supplementary Figure 21 |  $^{13}\text{C}$  NMR (DEPT135) spectrum ( $\text{C}_6\text{D}_6$ ) of **5a**.

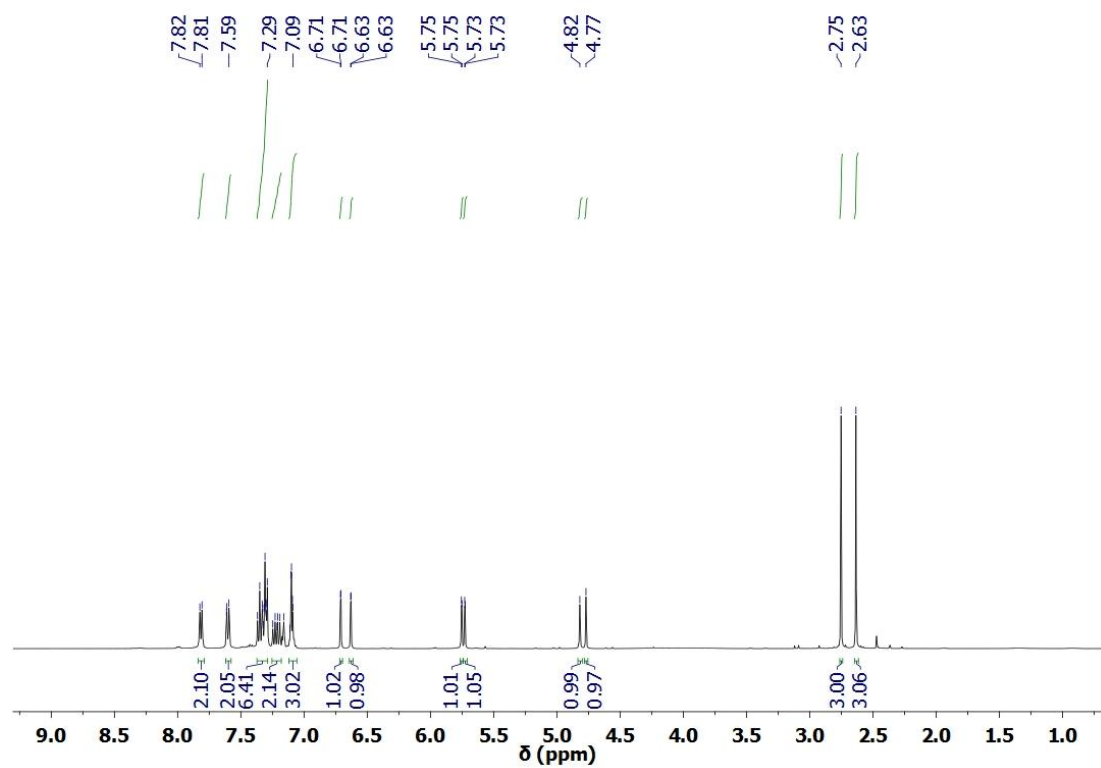

Supplementary Figure 22 |  $^1\text{H}$  NMR spectrum ( $\text{C}_6\text{D}_6$ ) of **5b**.

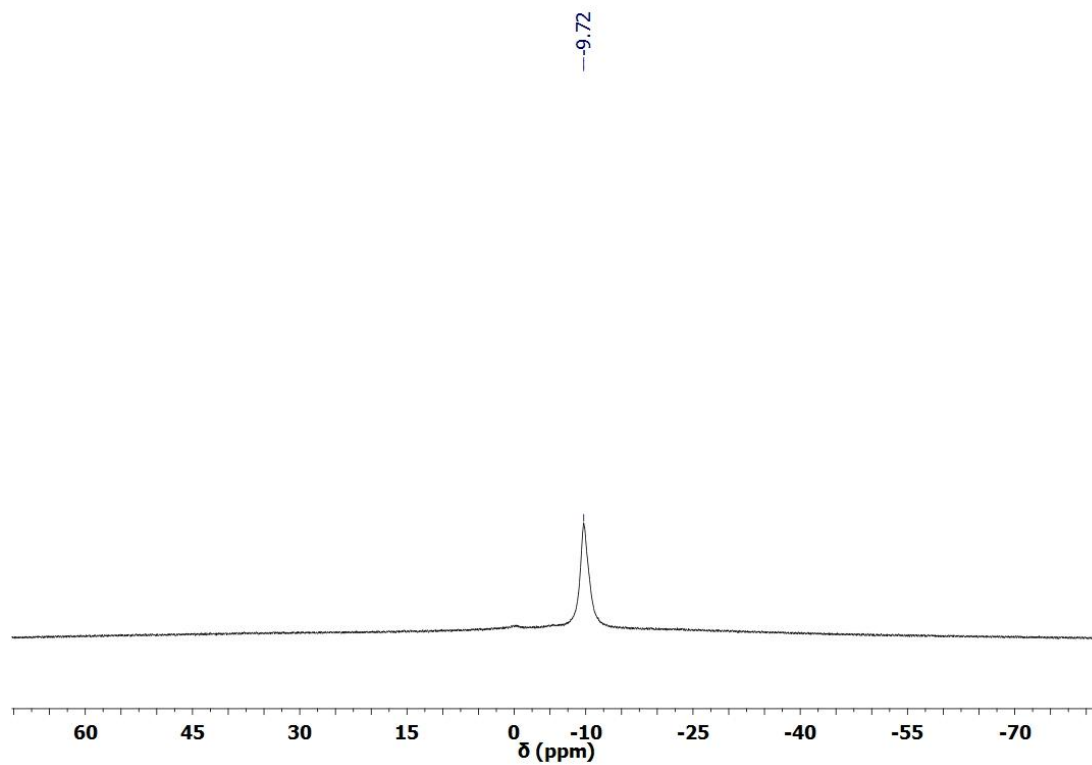

Supplementary Figure 23 | <sup>11</sup>B{<sup>1</sup>H} NMR spectrum (C<sub>6</sub>D<sub>6</sub>) of 5b.

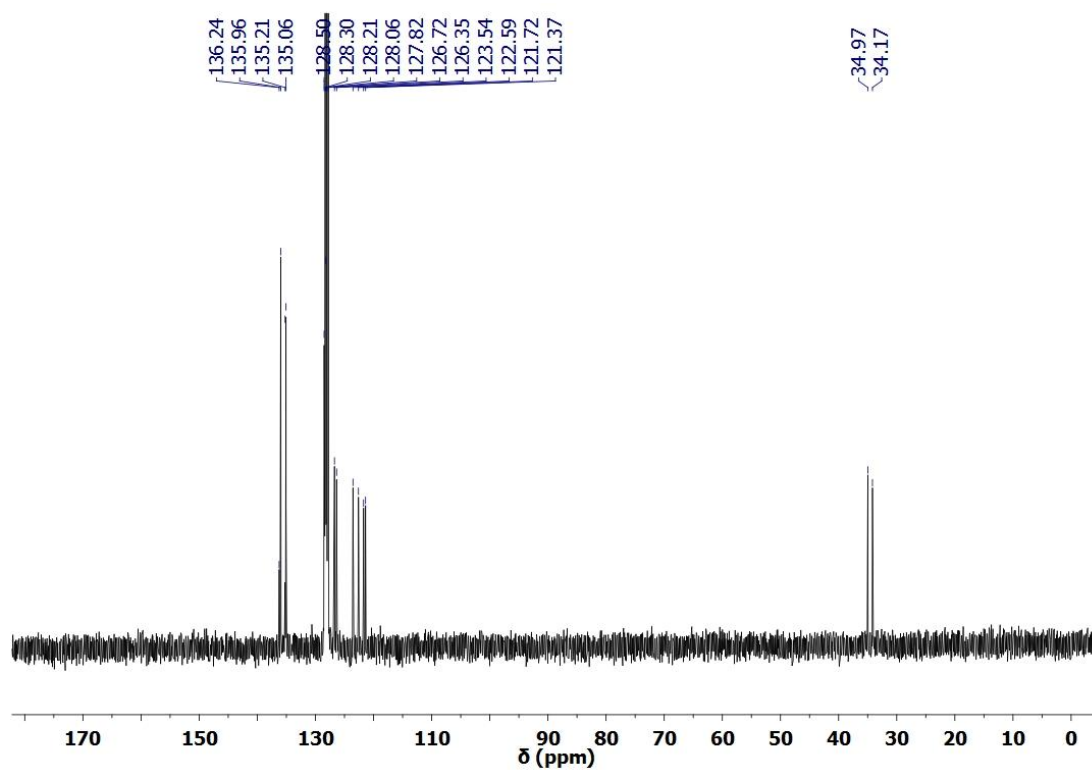

Supplementary Figure 24 | <sup>13</sup>C NMR spectrum (C<sub>6</sub>D<sub>6</sub>) of 5b.

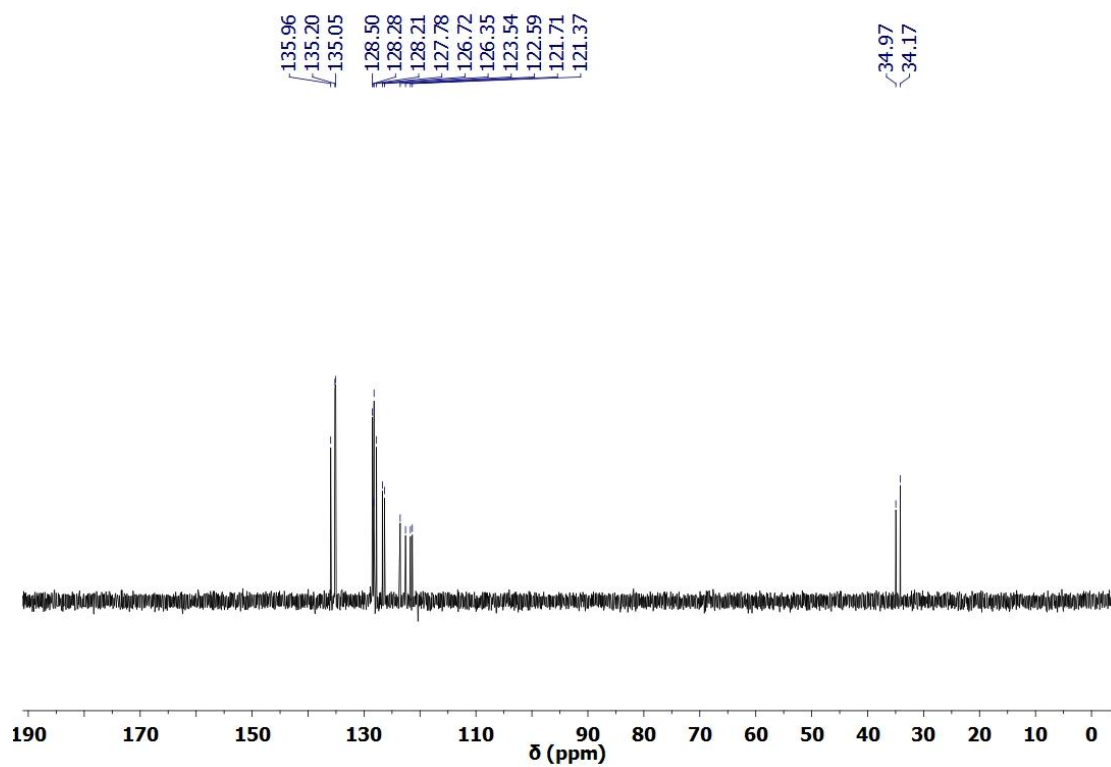

Supplementary Figure 25 |  $^{13}\text{C}$  NMR (DEPT135) spectrum ( $\text{C}_6\text{D}_6$ ) of **5b**.

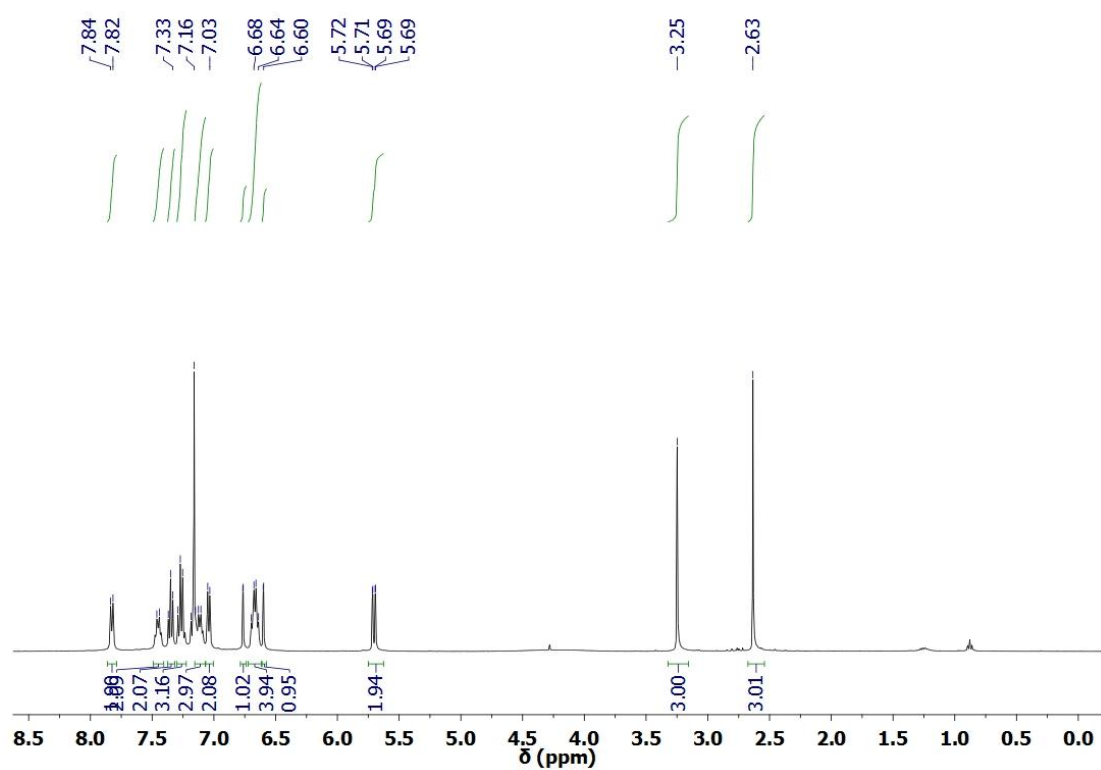

Supplementary Figure 26 |  $^1\text{H}$  NMR spectrum ( $\text{C}_6\text{D}_6$ ) of **6**.

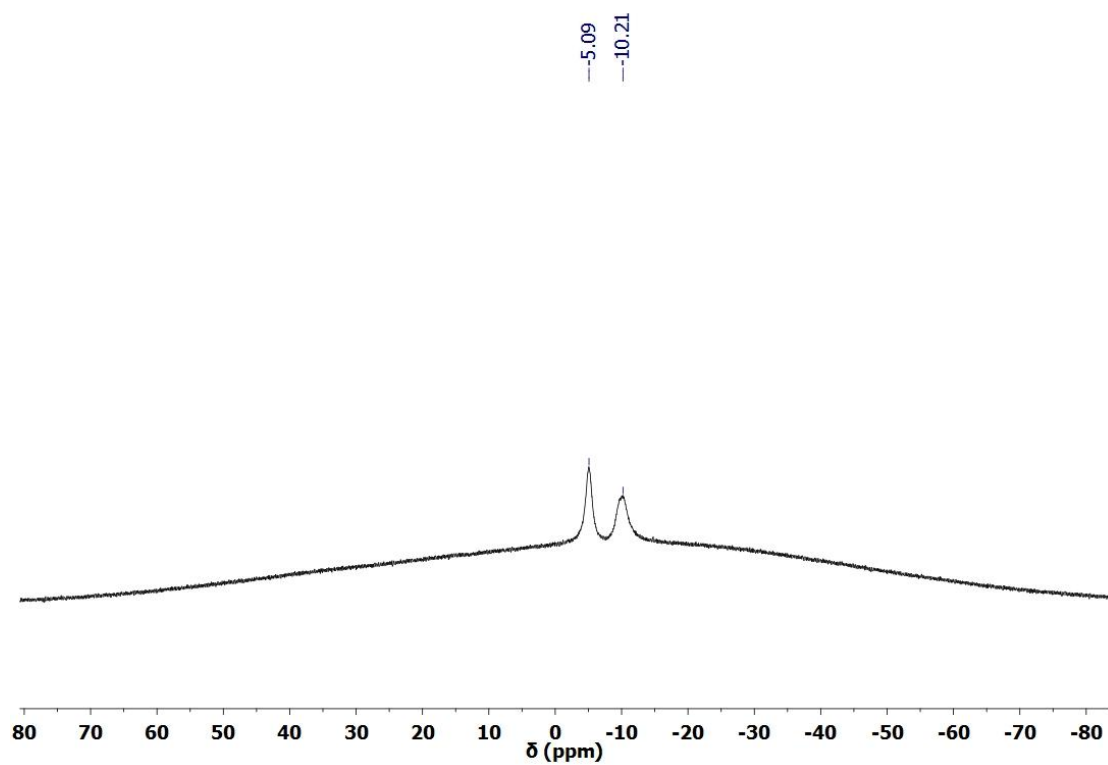

Supplementary Figure 27 | <sup>11</sup>B{<sup>1</sup>H} NMR spectrum (C<sub>6</sub>D<sub>6</sub>) of 6.

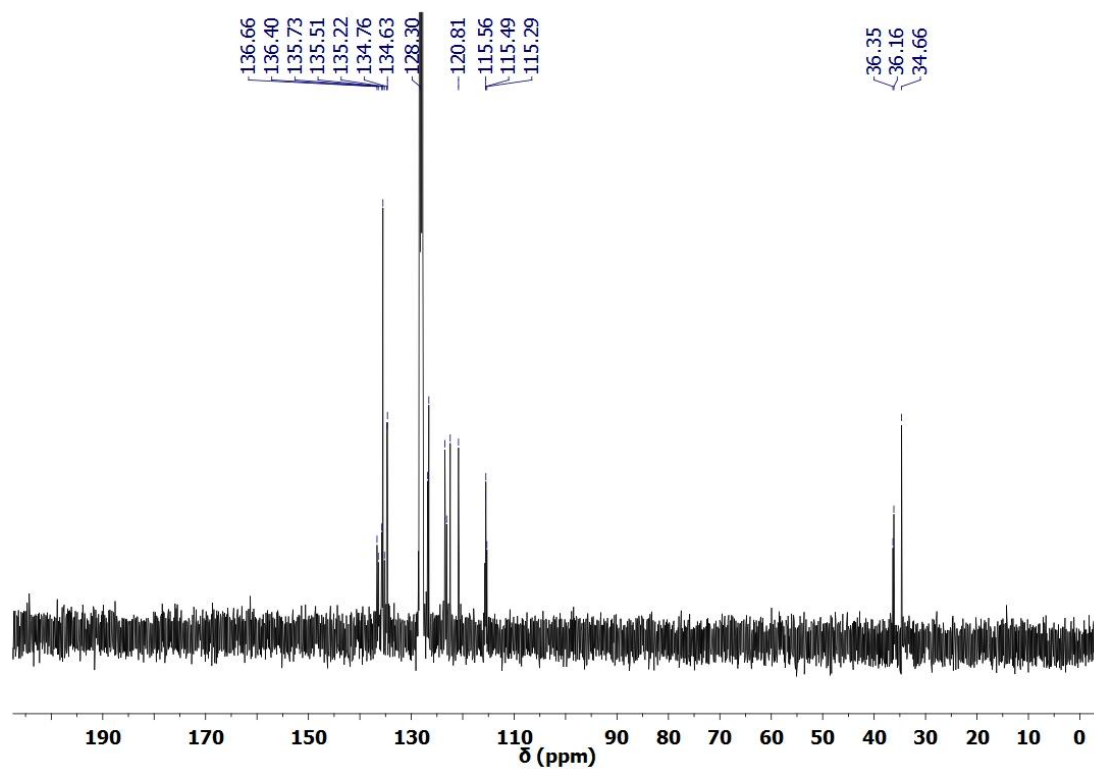

Supplementary Figure 28 | <sup>13</sup>C NMR spectrum (C<sub>6</sub>D<sub>6</sub>) of 6.

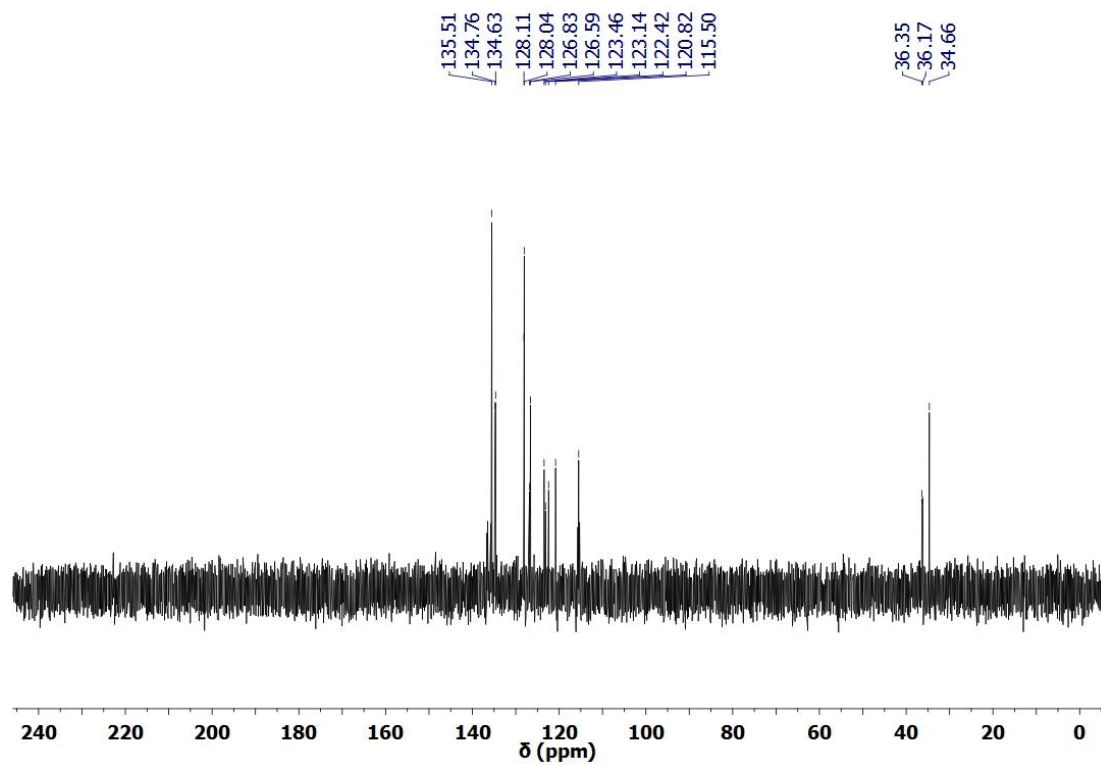

Supplementary Figure 29 |  $^{13}\text{C}$  NMR (DEPT135) spectrum ( $\text{C}_6\text{D}_6$ ) of **6**.

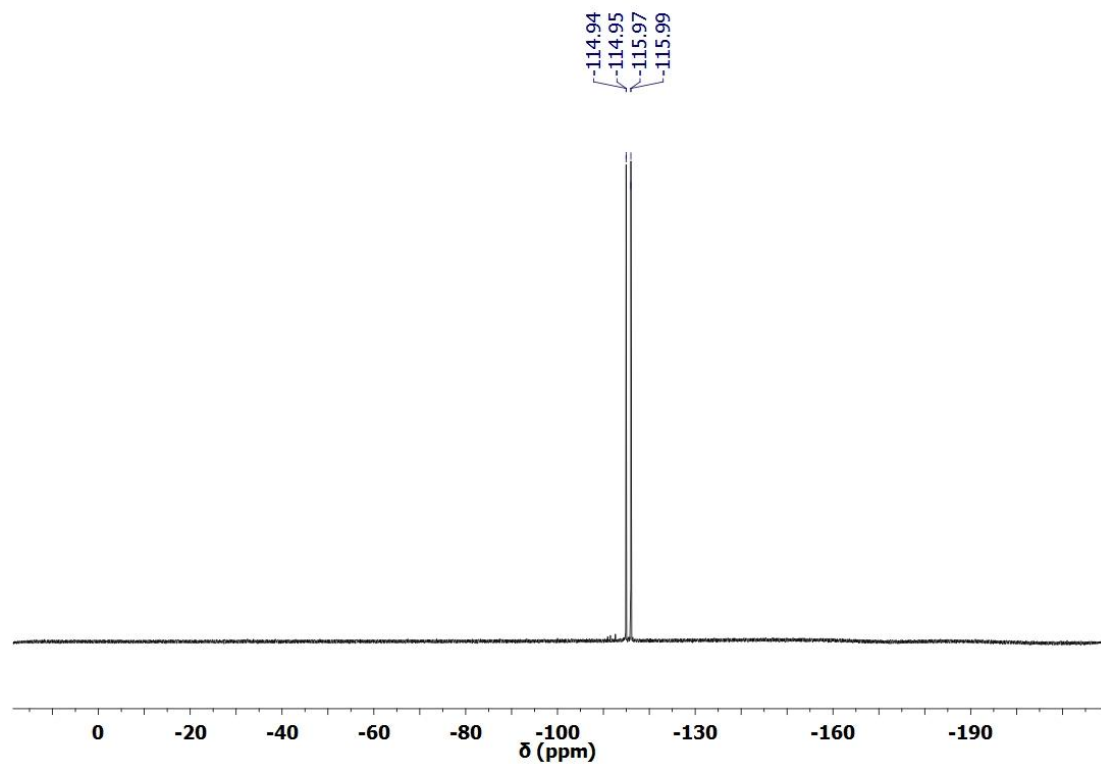

Supplementary Figure 30 |  $^{19}\text{F}$  NMR spectrum ( $\text{C}_6\text{D}_6$ ) of **6**.

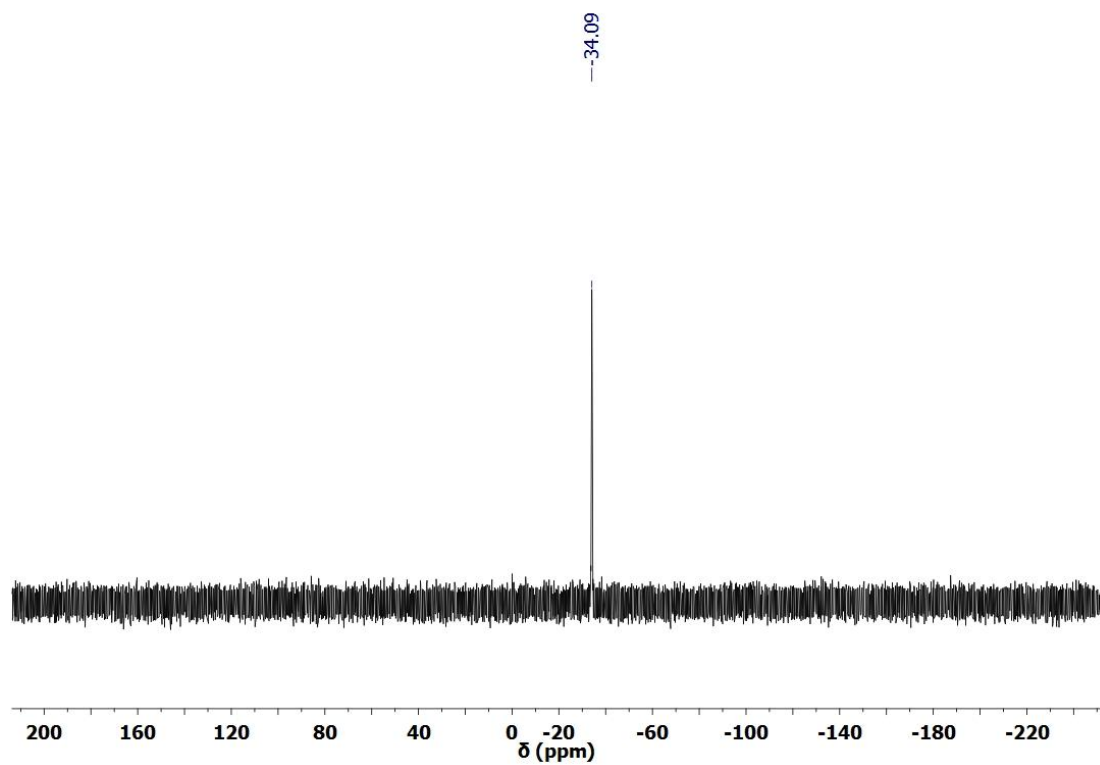

Supplementary Figure 31 | <sup>31</sup>P NMR spectrum (C<sub>6</sub>D<sub>6</sub>) of 6.

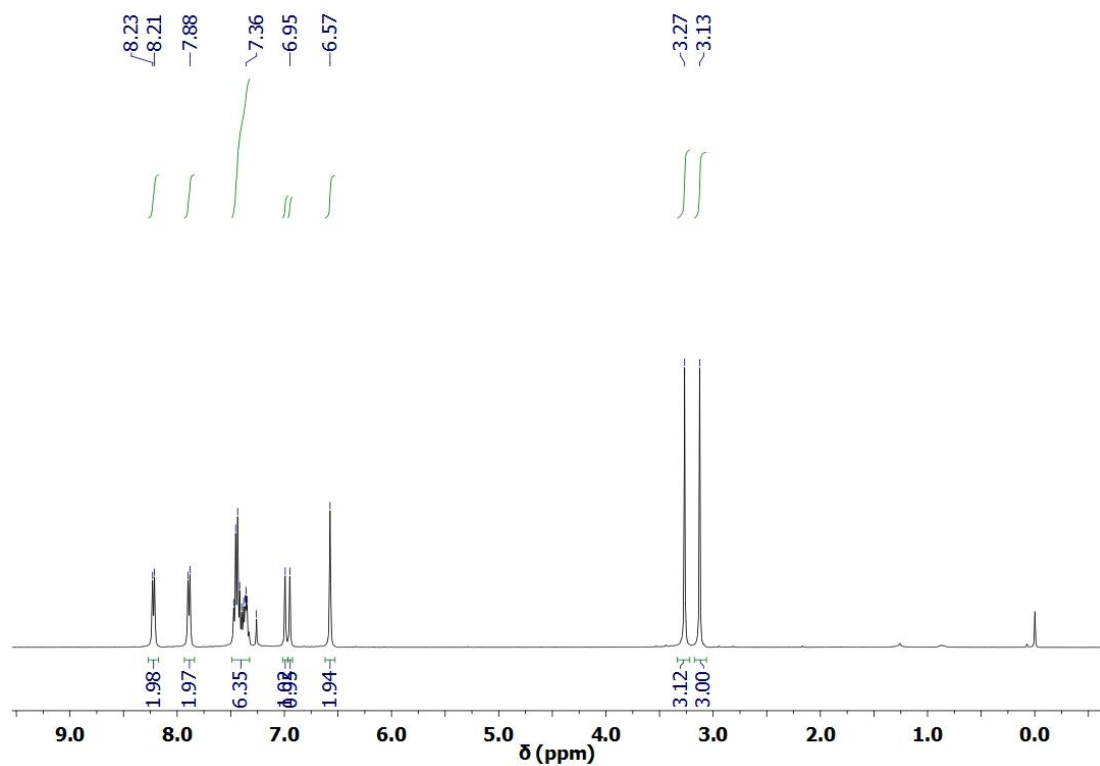

Supplementary Figure 32 | <sup>1</sup>H NMR spectrum (CDCl<sub>3</sub>) of 7.



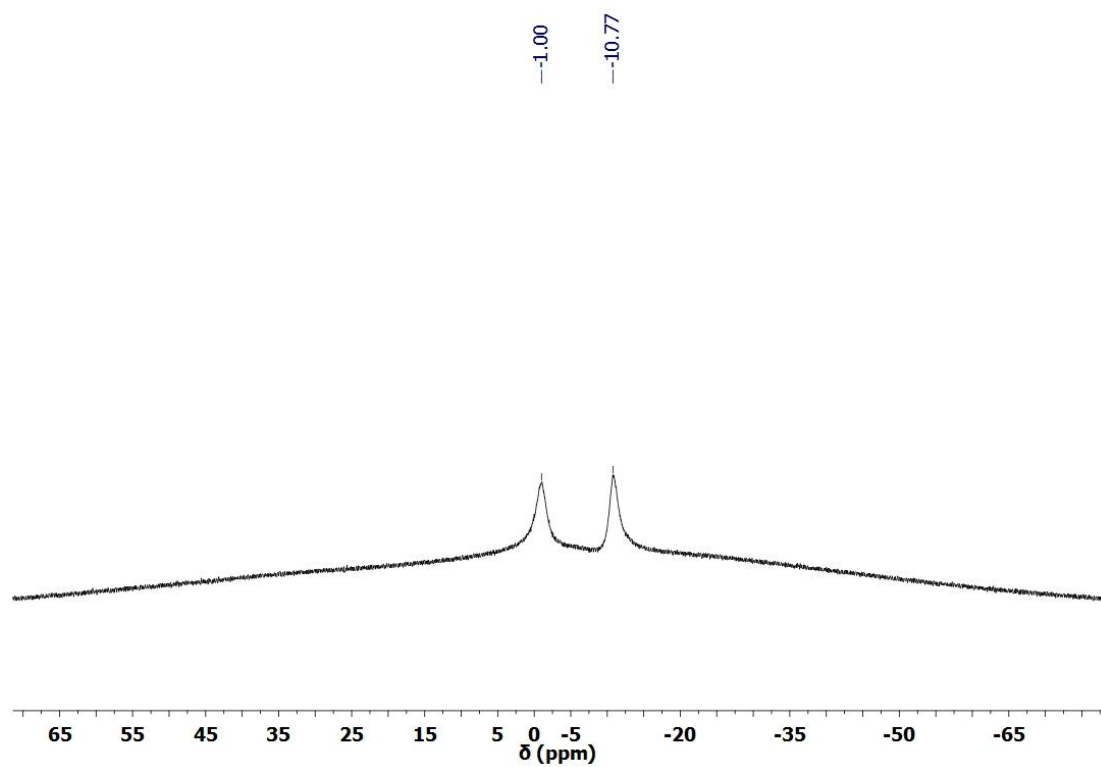

Supplementary Figure 33 |  $^{11}\text{B}\{^1\text{H}\}$  NMR spectrum (CDCl<sub>3</sub>) of 7.

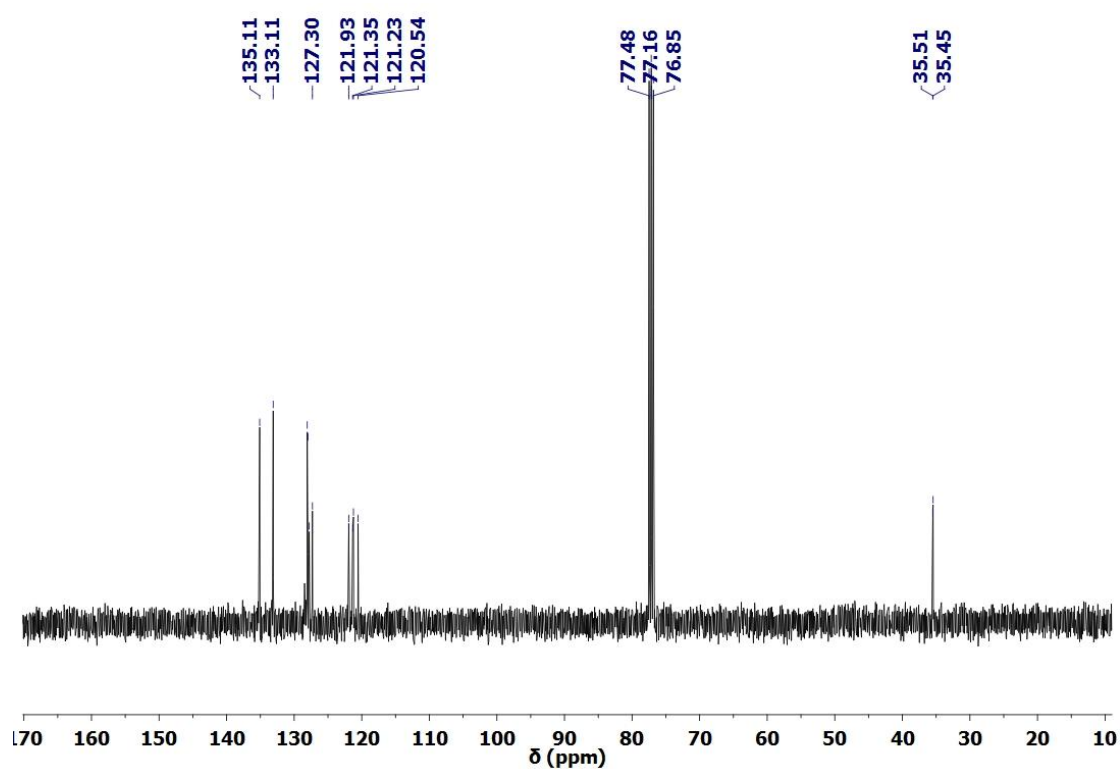

Supplementary Figure 34 |  $^{13}\text{C}$  NMR spectrum (CDCl<sub>3</sub>) of 7.

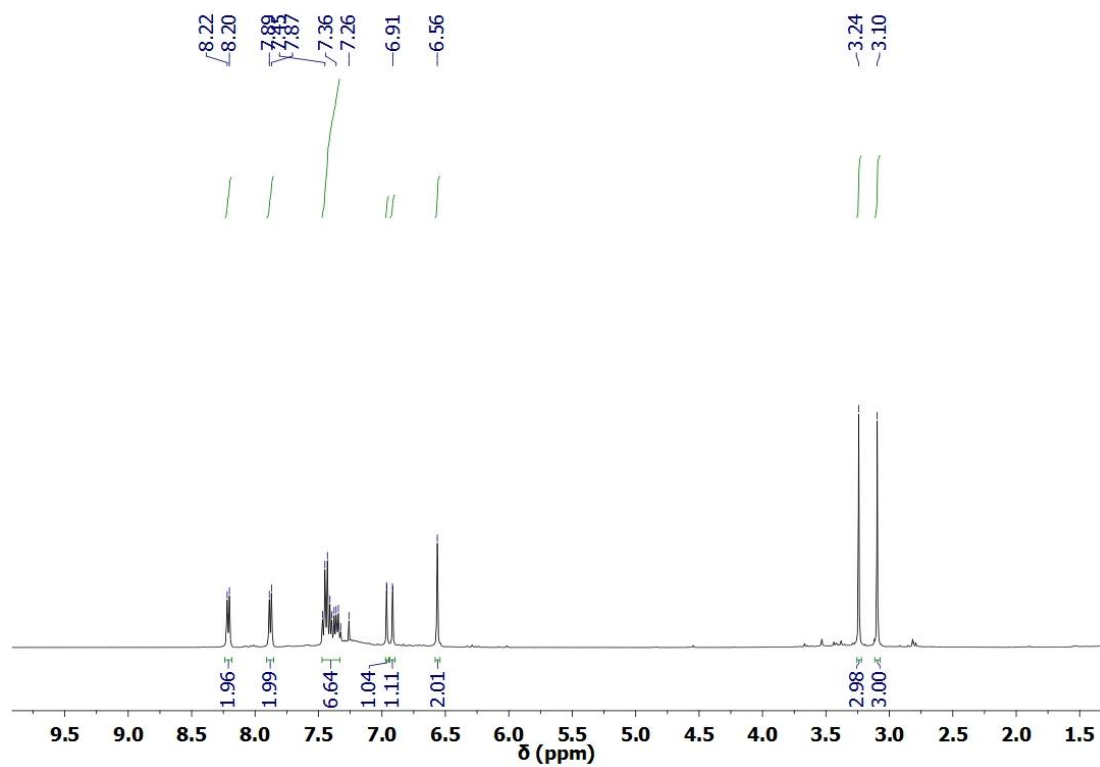

Supplementary Figure 35 |  $^1\text{H}$  NMR spectrum ( $\text{CDCl}_3$ ) of  $7\text{-}^{13}\text{C}$ .

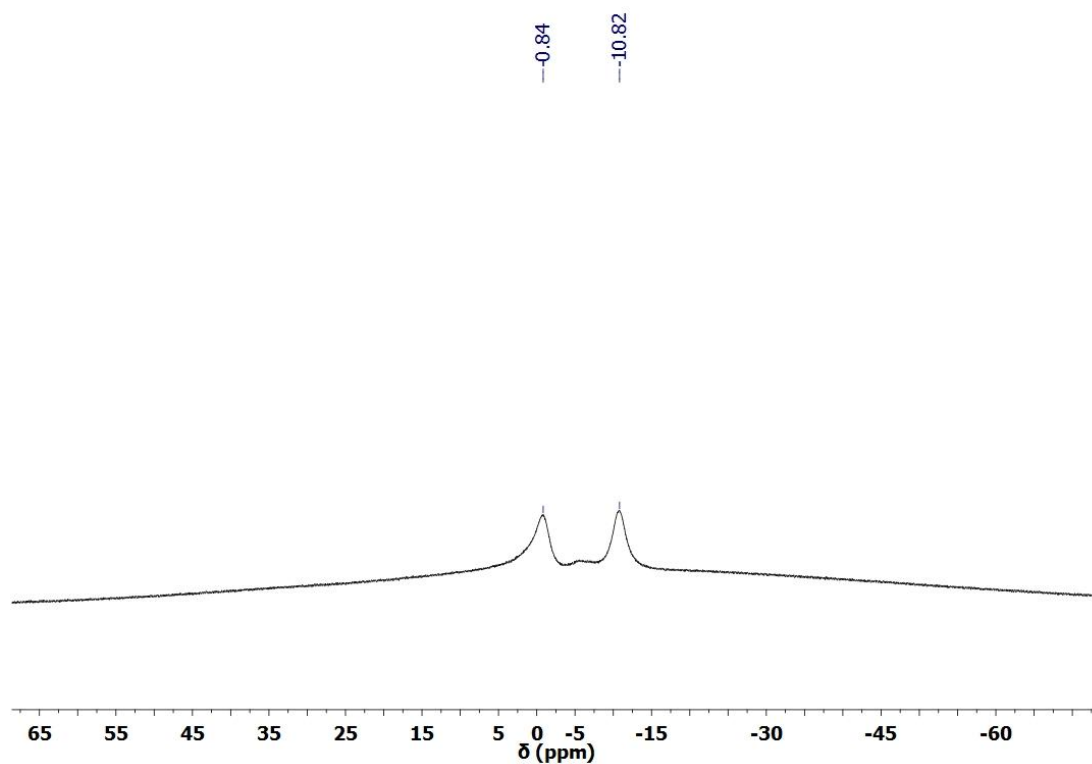

Supplementary Figure 36 |  $^{11}\text{B}\{^1\text{H}\}$  NMR spectrum ( $\text{CDCl}_3$ ) of  $7\text{-}^{13}\text{C}$ .

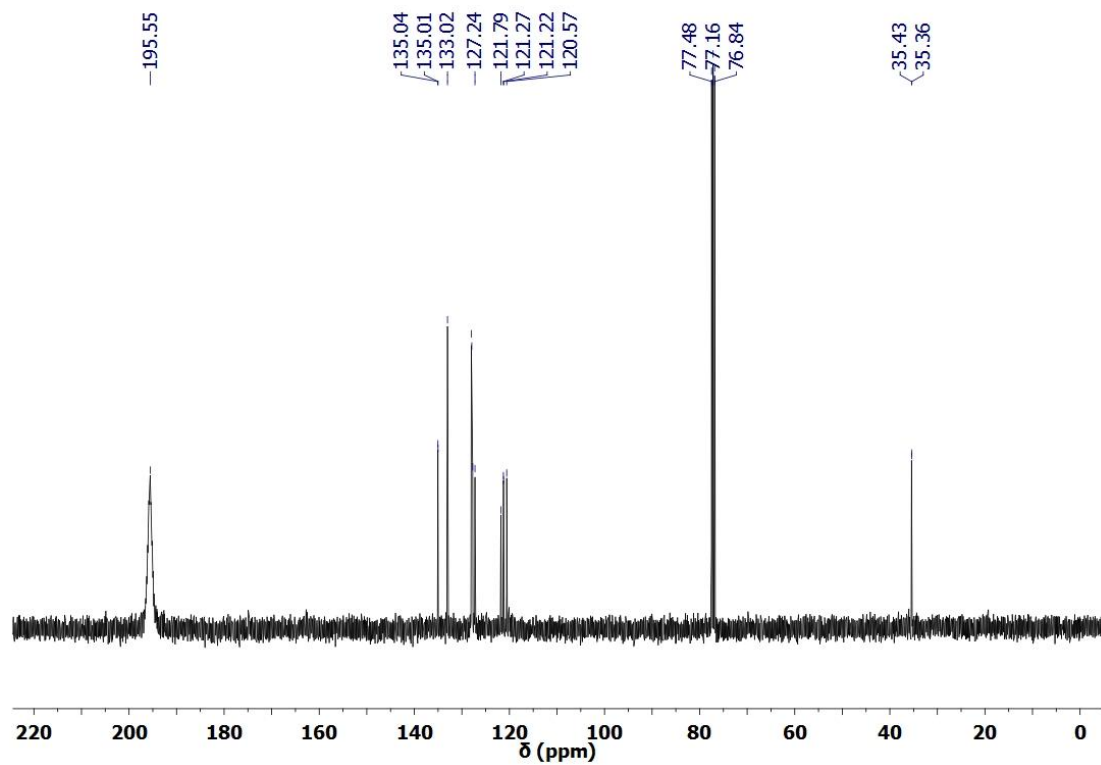

Supplementary Figure 37 |  $^{13}\text{C}$  NMR spectrum ( $\text{CDCl}_3$ ) of  $7\text{-}^{13}\text{C}$ .

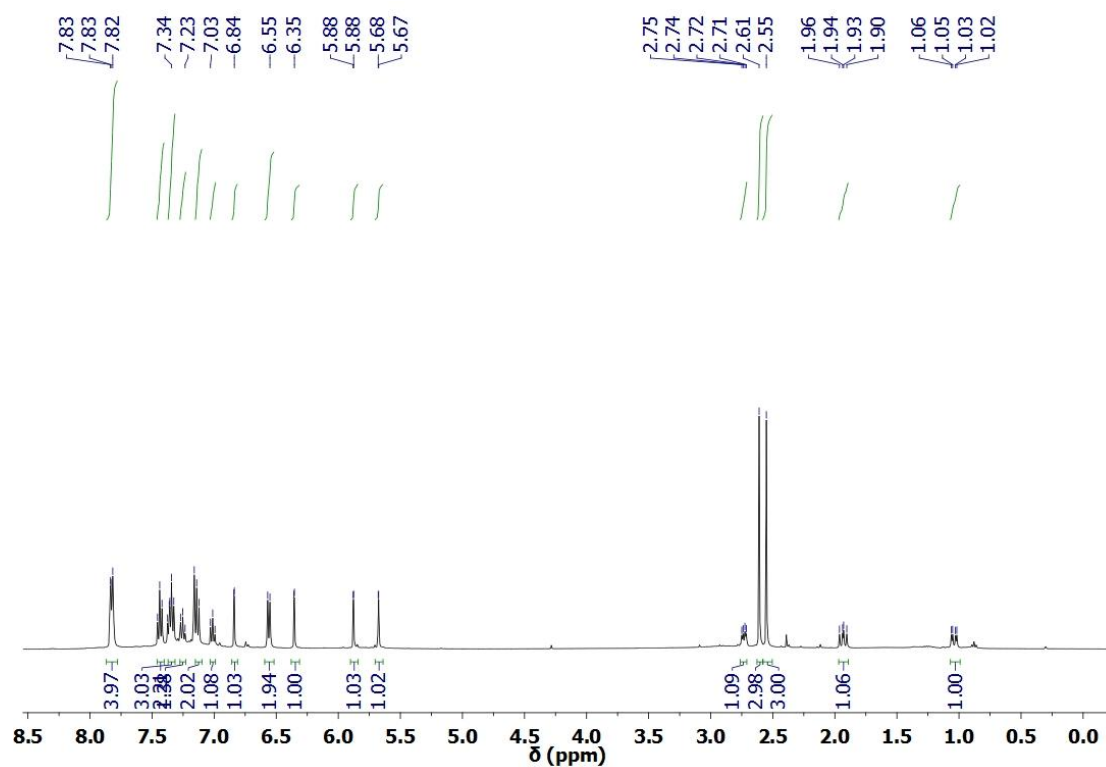

Supplementary Figure 38 |  $^1\text{H}$  NMR spectrum ( $\text{C}_6\text{D}_6$ ) of **8**.

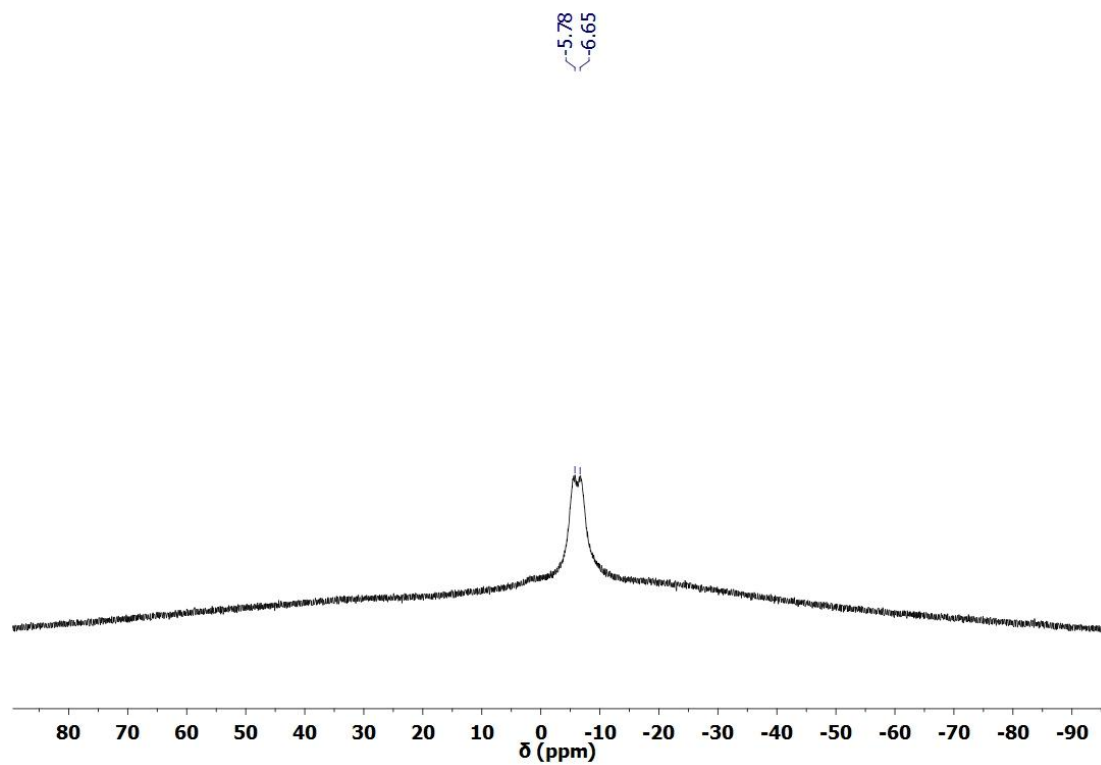

Supplementary Figure 39 |  $^1\text{H}$  NMR spectrum (C<sub>6</sub>D<sub>6</sub>) of 8.

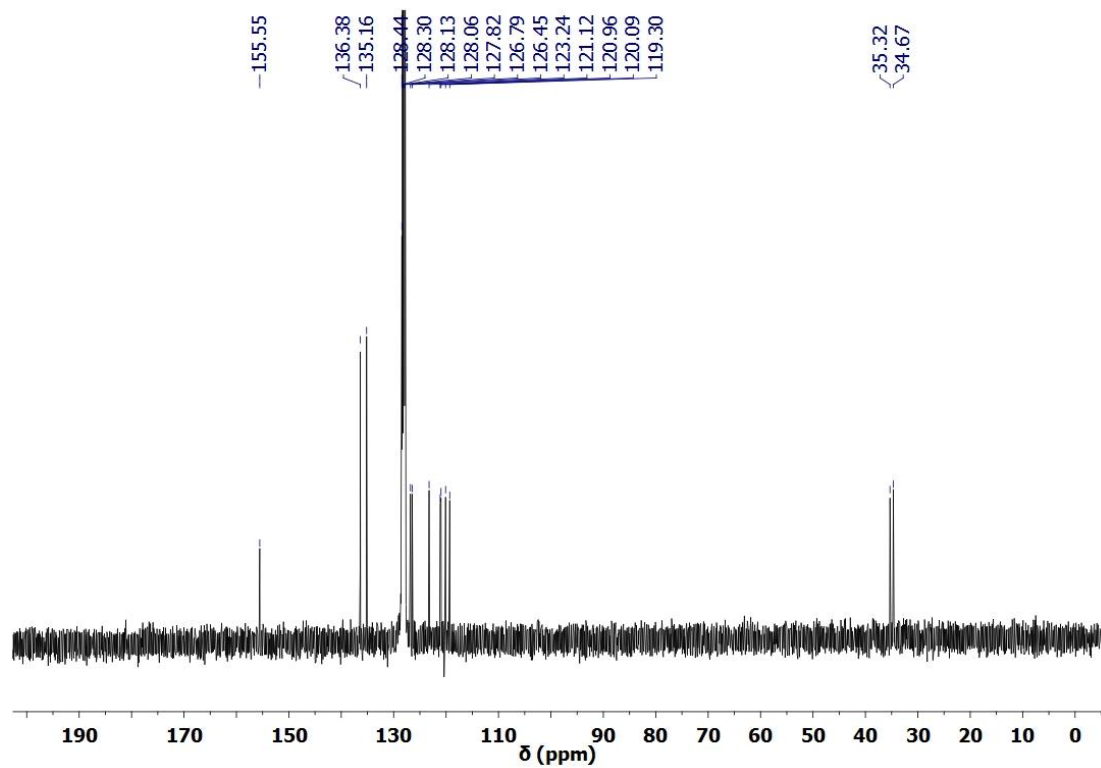

Supplementary Figure 40 |  $^{13}\text{C}$  NMR spectrum (C<sub>6</sub>D<sub>6</sub>) of 8.

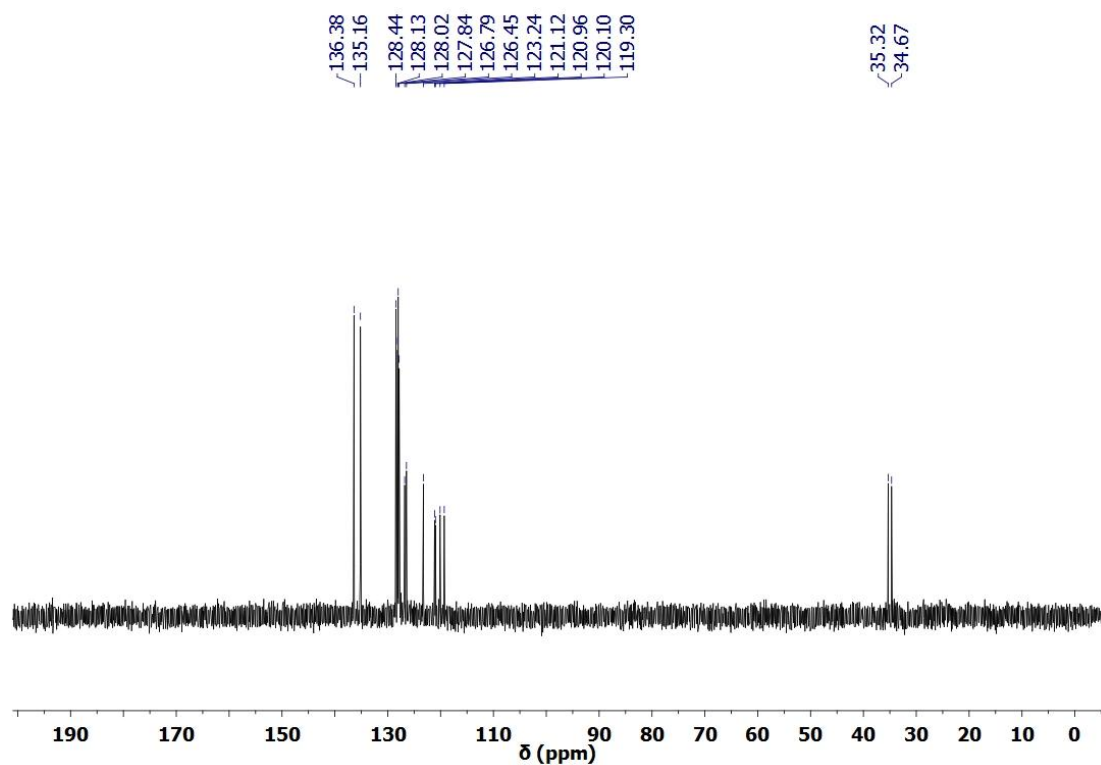

Supplementary Figure 41 |  $^{13}\text{C}$  NMR (DEPT135) spectrum ( $\text{C}_6\text{D}_6$ ) of **8**.

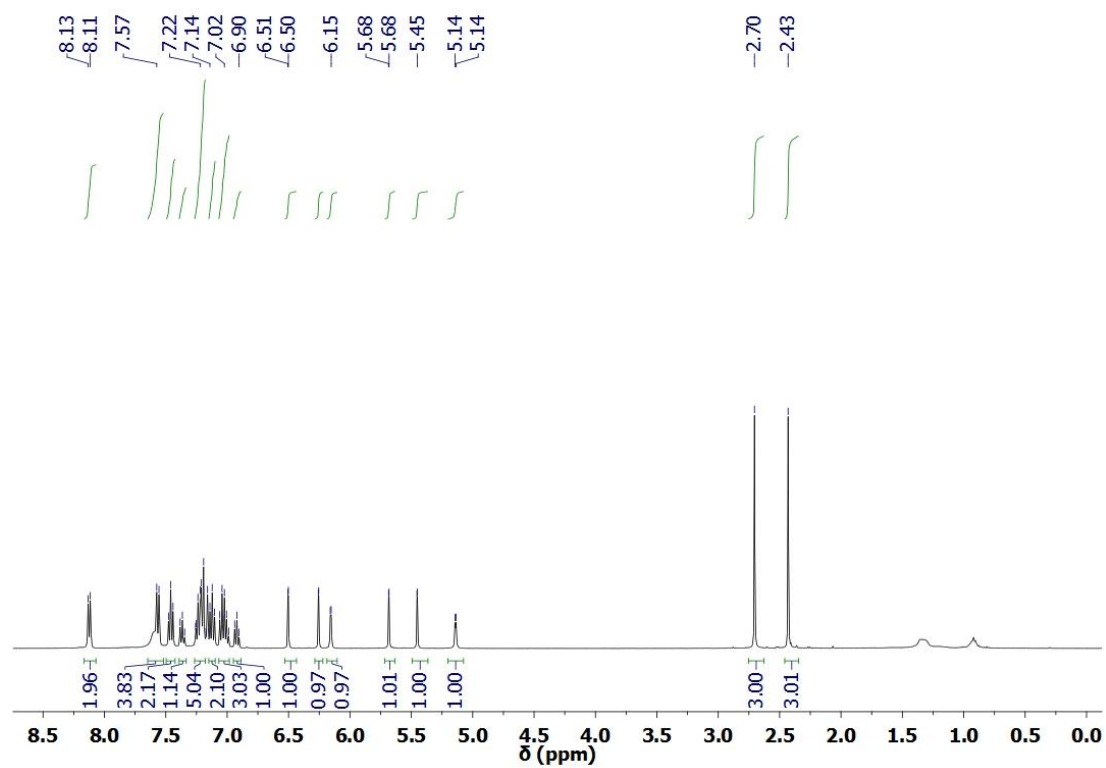

Supplementary Figure 42 |  $^1\text{H}$  NMR spectrum ( $\text{C}_6\text{D}_6$ ) of **9**.

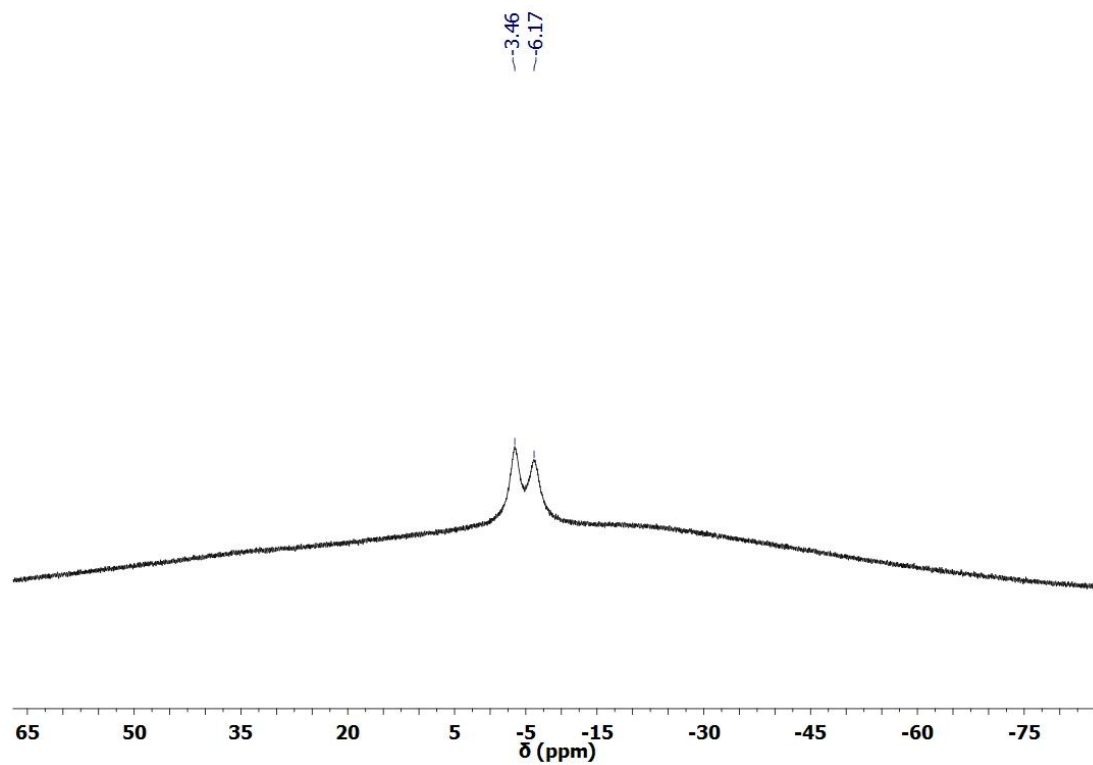

Supplementary Figure 43 |  $^{11}\text{B}\{^1\text{H}\}$  NMR spectrum (C<sub>6</sub>D<sub>6</sub>) of **9**.

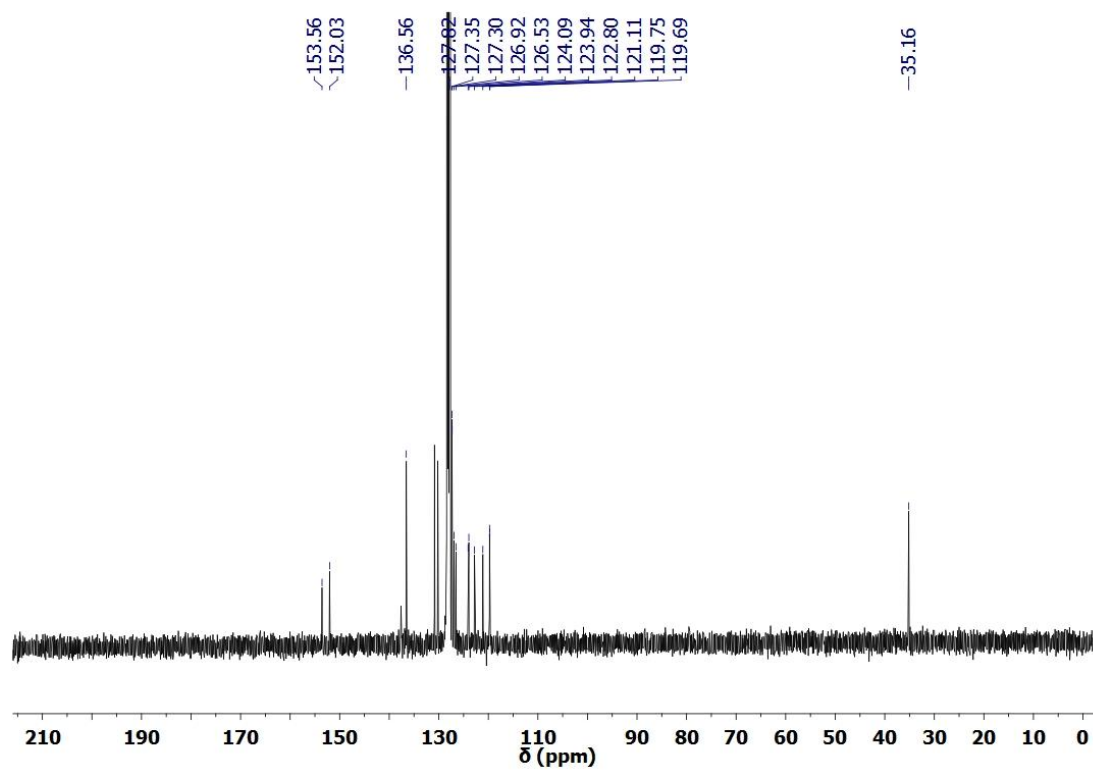

Supplementary Figure 44 |  $^{13}\text{C}$  NMR spectrum (C<sub>6</sub>D<sub>6</sub>) of **9**.

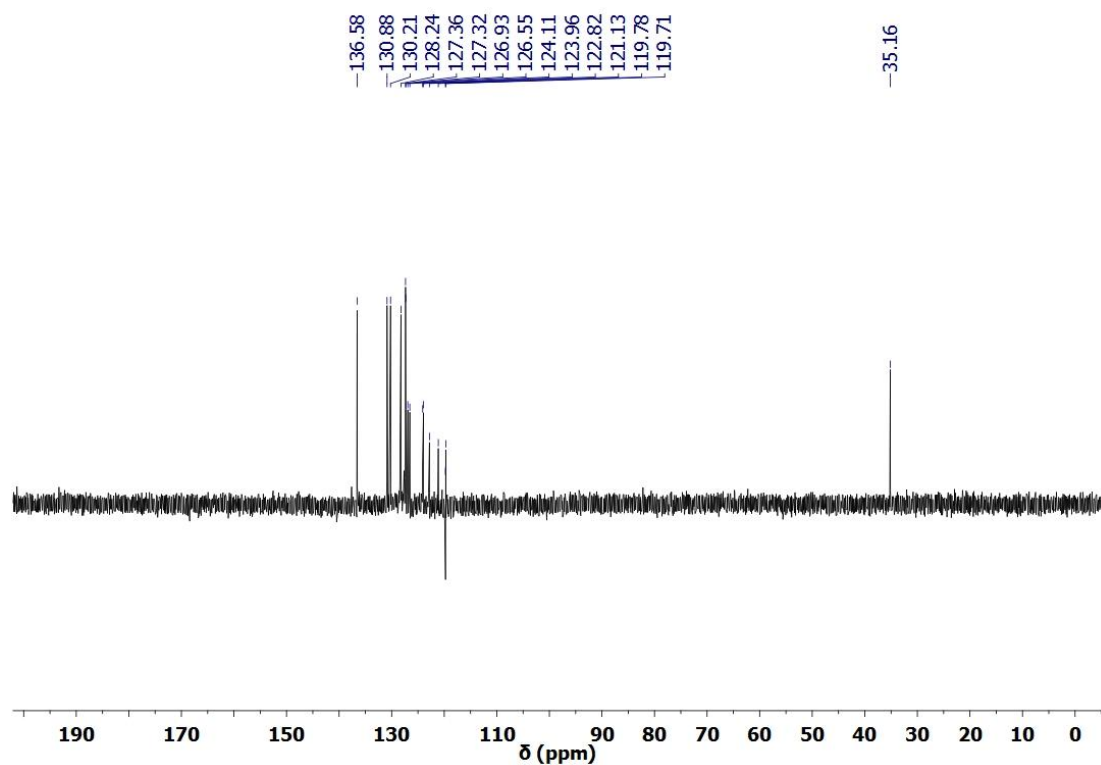

Supplementary Figure 45 |  $^{13}\text{C}$  NMR (DEPT135) spectrum ( $\text{C}_6\text{D}_6$ ) of **9**.

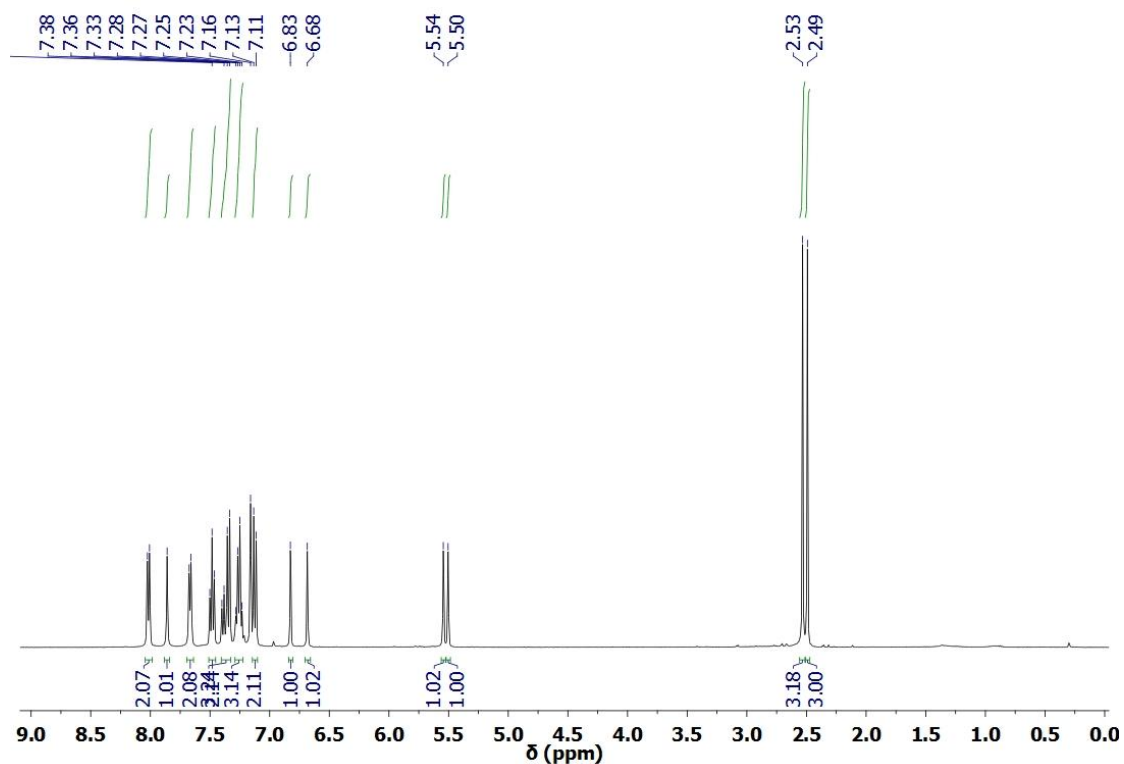

Supplementary Figure 46 |  $^1\text{H}$  NMR spectrum ( $\text{C}_6\text{D}_6$ ) of **10**.

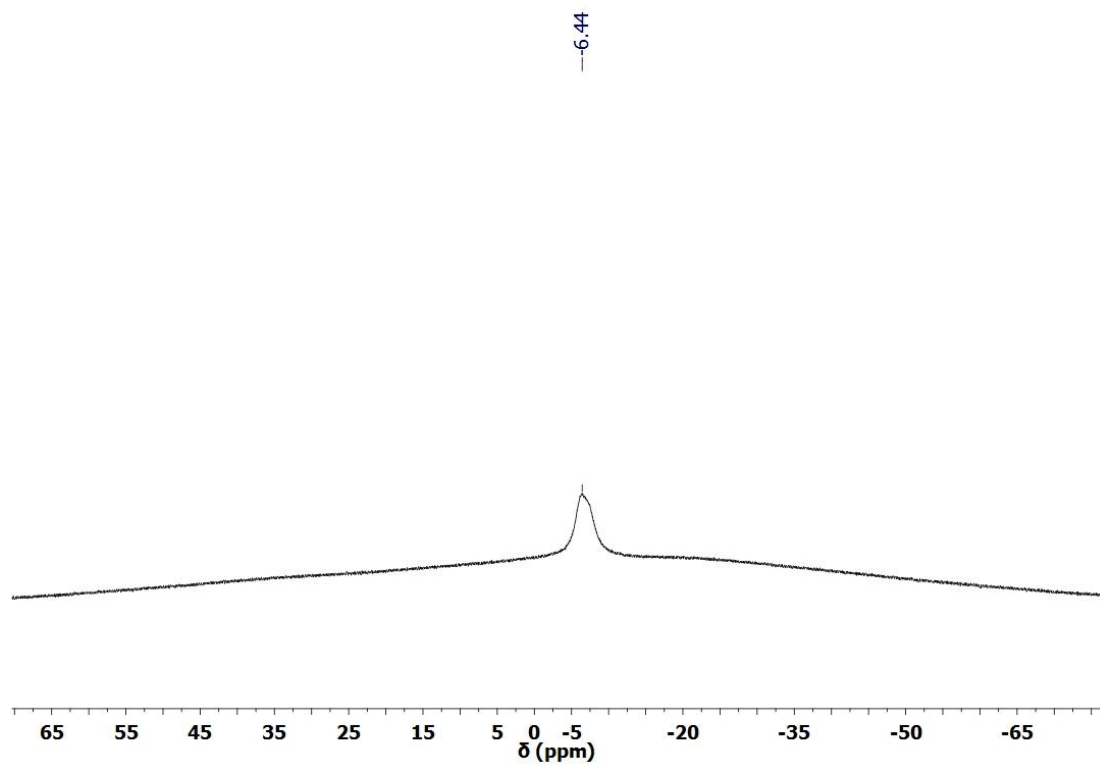

Supplementary Figure 47 | <sup>11</sup>B{<sup>1</sup>H} NMR spectrum (C<sub>6</sub>D<sub>6</sub>) of 10.

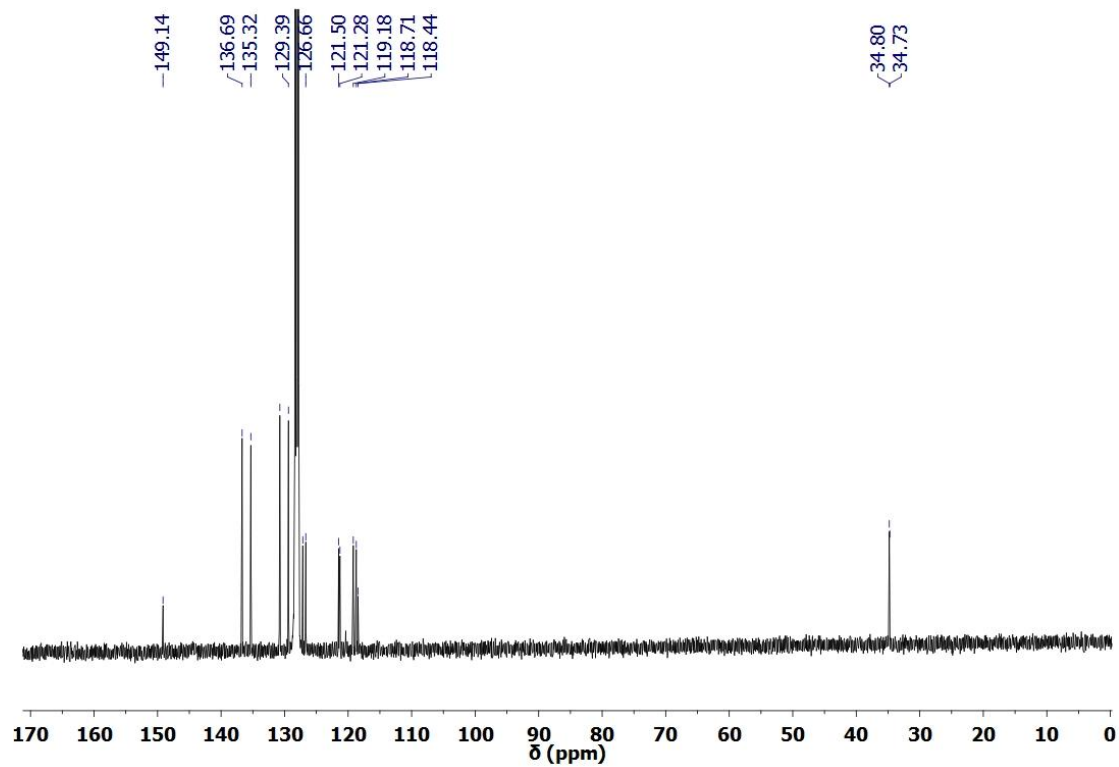

Supplementary Figure 48 | <sup>13</sup>C NMR spectrum (C<sub>6</sub>D<sub>6</sub>) of 10.



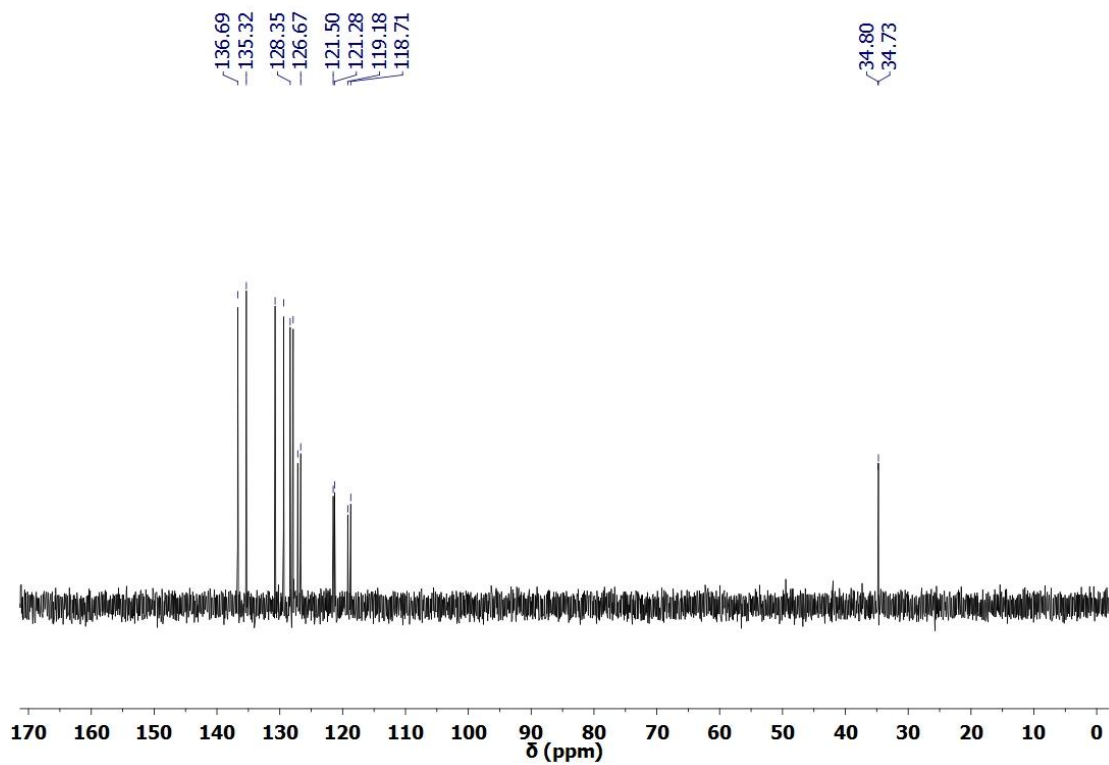

Supplementary Figure 49 |  $^{13}\text{C}$  NMR (DEPT135) spectrum ( $\text{C}_6\text{D}_6$ ) of **10**.

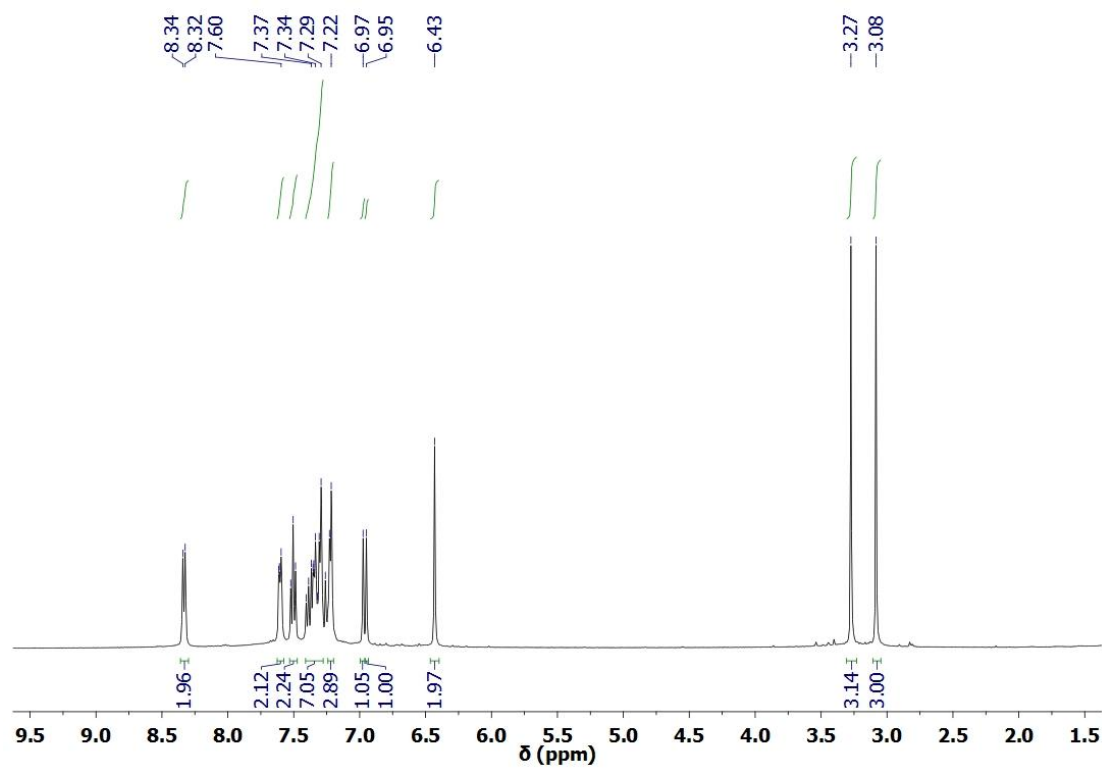

Supplementary Figure 50 |  $^1\text{H}$  NMR spectrum ( $\text{CDCl}_3$ ) of **11a**.

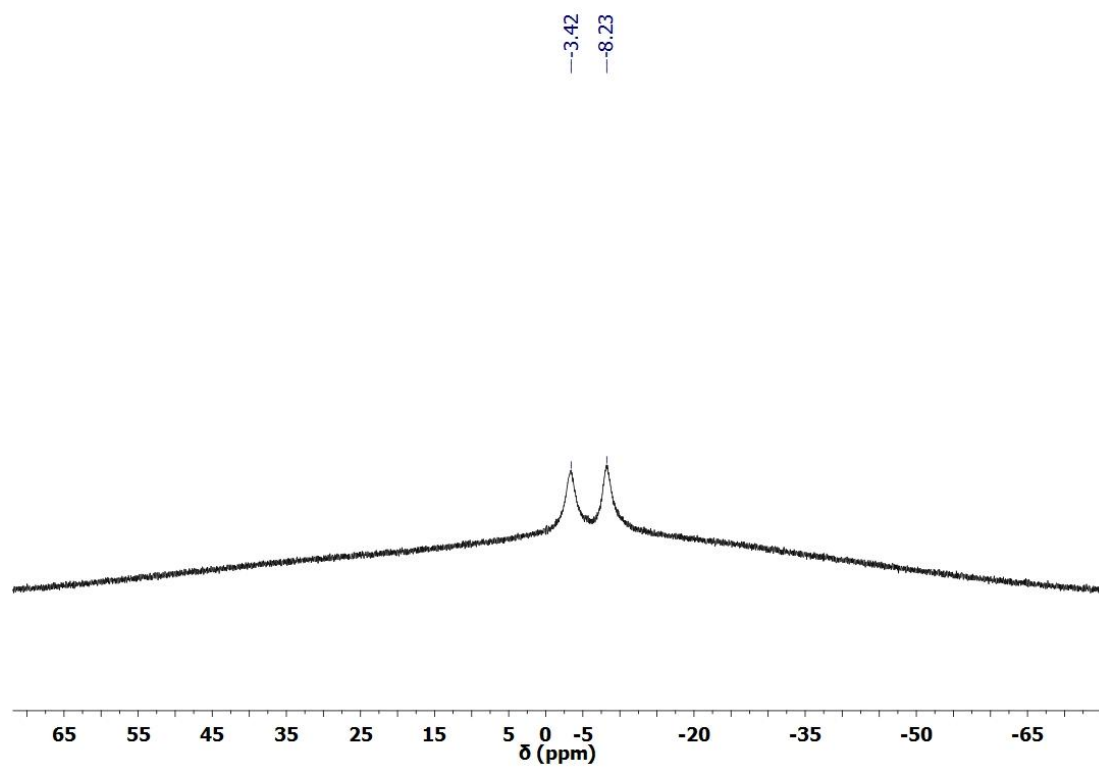

Supplementary Figure 51 |  $^{11}\text{B}\{^1\text{H}\}$  NMR spectrum ( $\text{CDCl}_3$ ) of 11a.

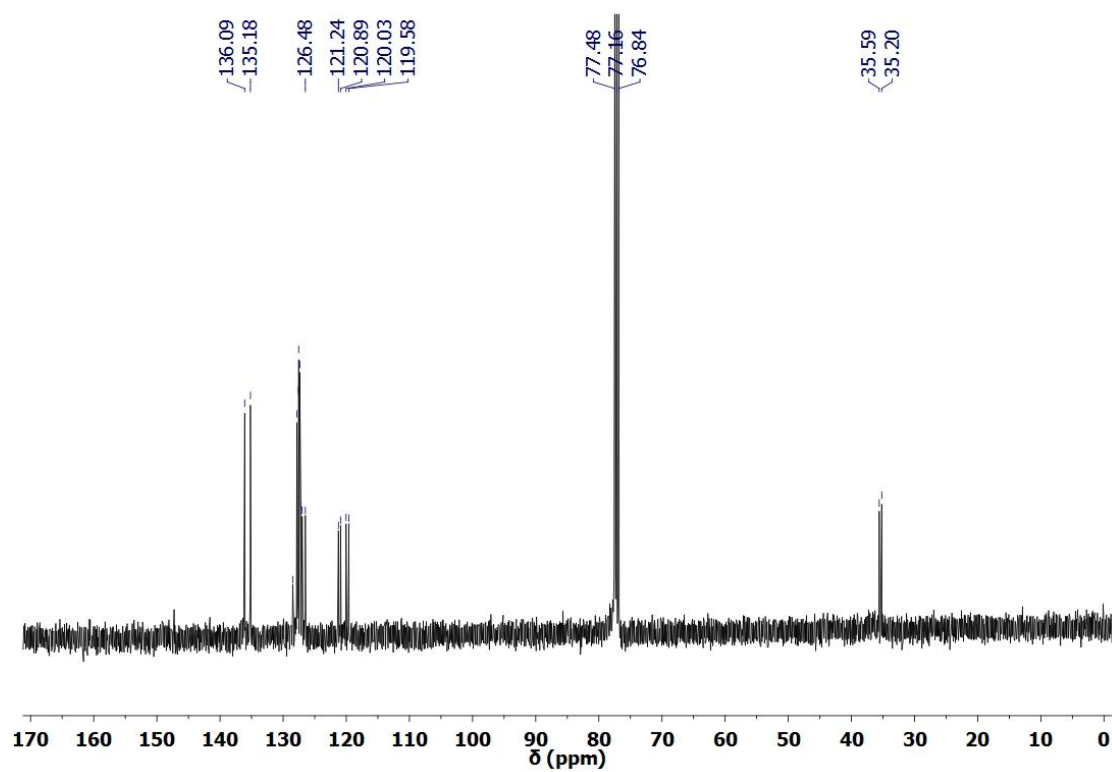

Supplementary Figure 52 |  $^{13}\text{C}$  NMR spectrum ( $\text{CDCl}_3$ ) of 11a.

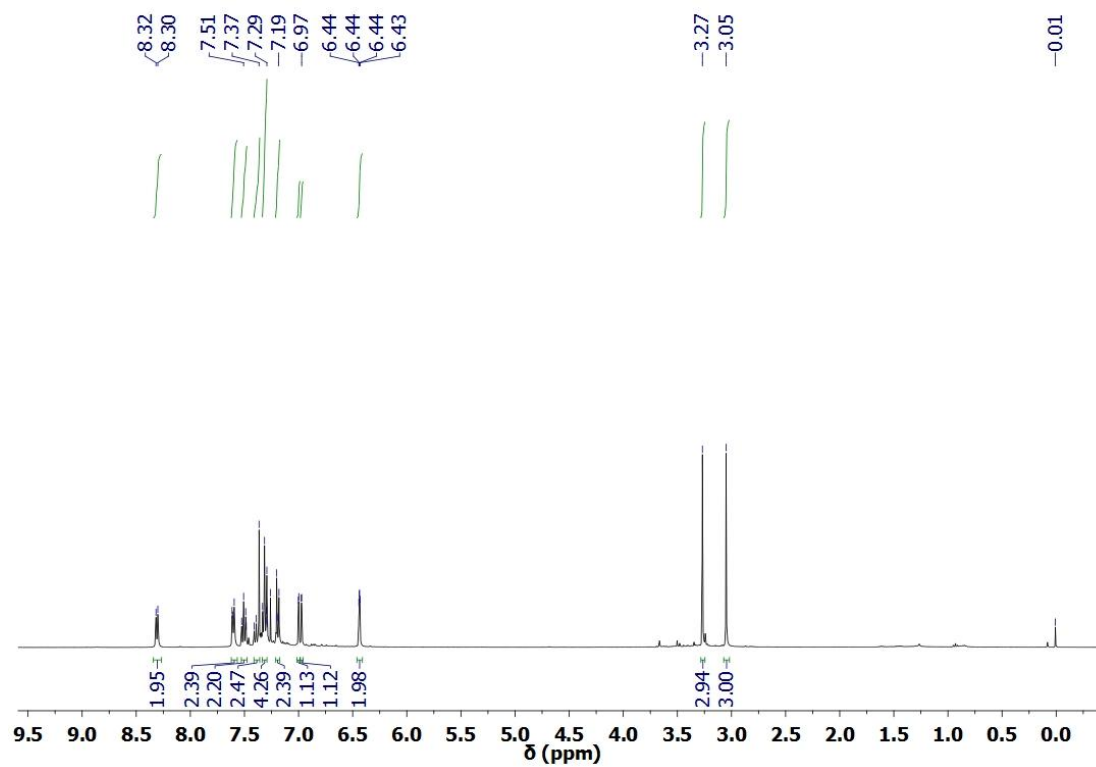

Supplementary Figure 53 |  $^1\text{H}$  NMR spectrum ( $\text{CDCl}_3$ ) of **11b**.

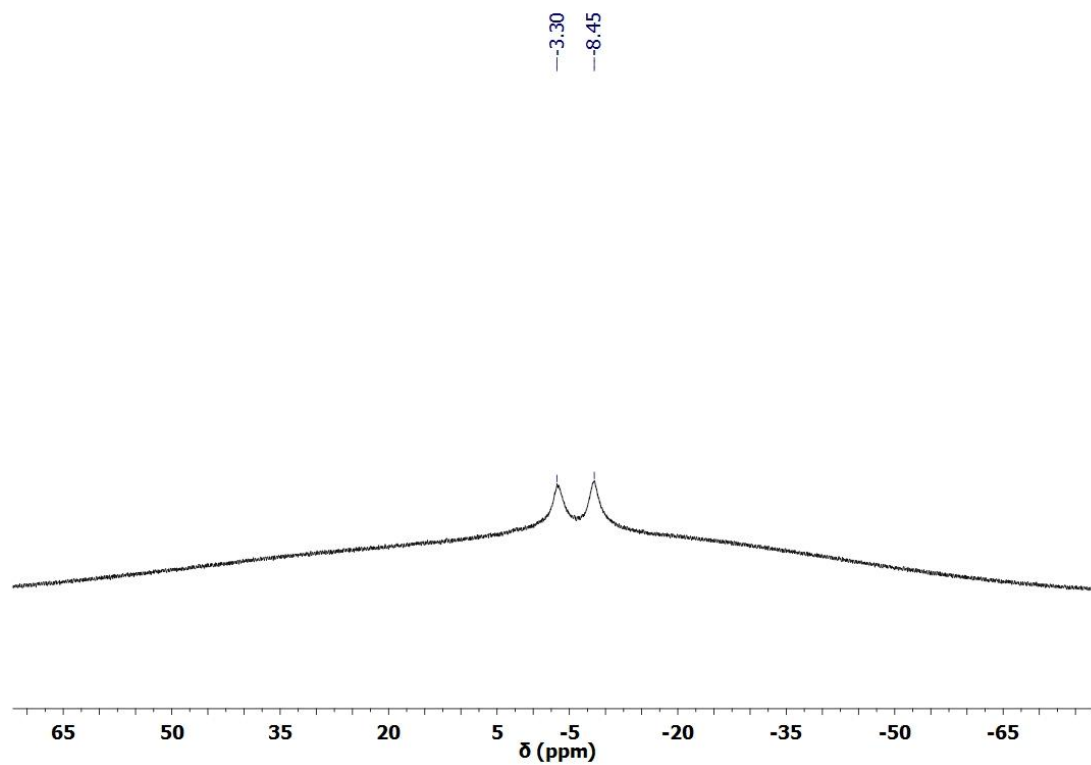

Supplementary Figure 54 |  $^{11}\text{B}\{^1\text{H}\}$  NMR spectrum ( $\text{CDCl}_3$ ) of **11b**.

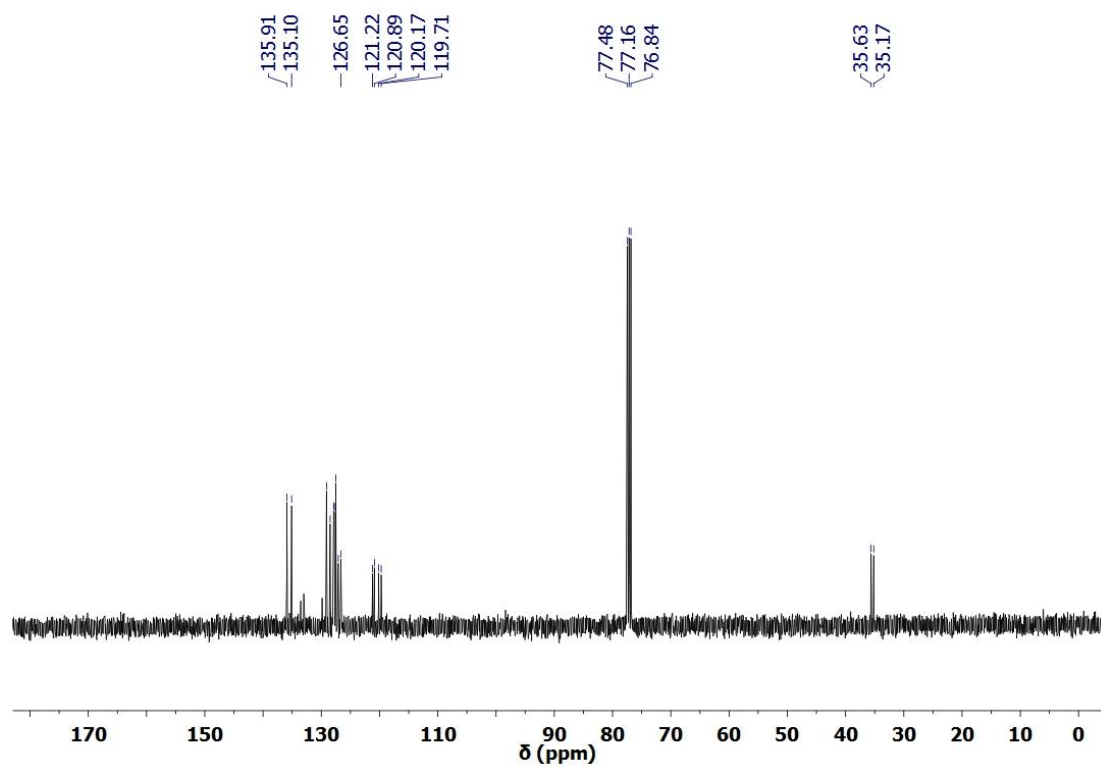

Supplementary Figure 55 | <sup>13</sup>C NMR spectrum (CDCl<sub>3</sub>) of **11b**.

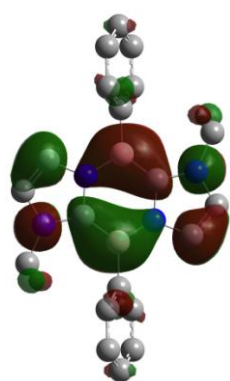

HOMO (- 3.7242)

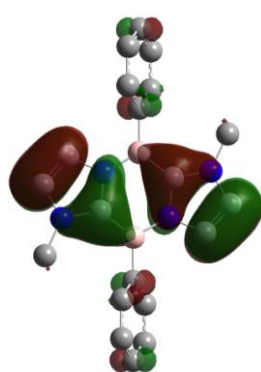

HOMO-1 (- 6.4263)

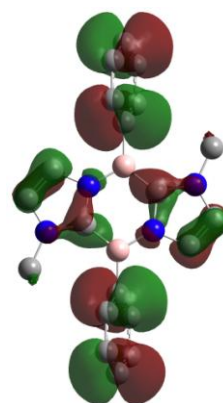

HOMO-2 (- 6.6690)

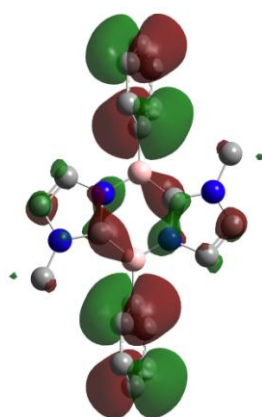

HOMO-3 (- 6.7131)

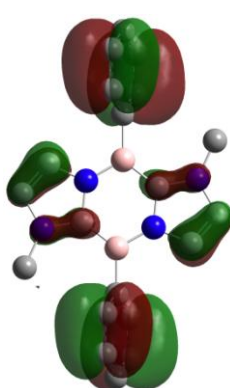

HOMO-4 (- 6.7634)

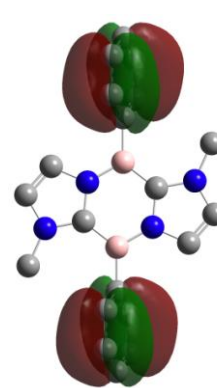

HOMO-5 (- 6.7942)

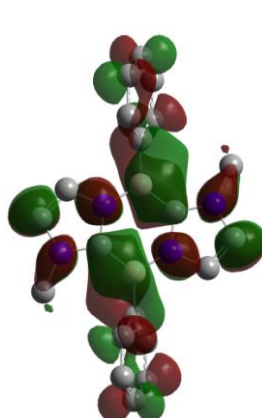

LUMO (- 0.8558)

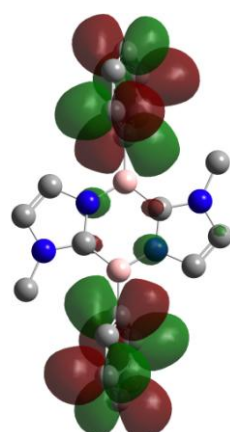

LUMO+1 (- 0.3388)

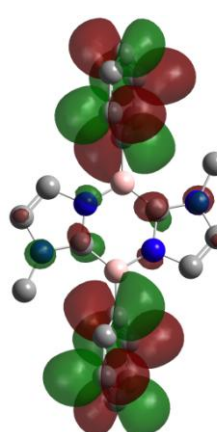

LUMO+2 (- 0.3135)

**Supplementary Figure 56** | Plots of the frontier orbitals of **2** (Hydrogen atoms are omitted for clarity). The eigenvalues (eV) are provided in the parentheses.

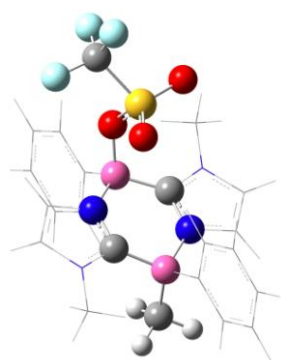

**3A** (0.0 kcal·mol<sup>-1</sup>)

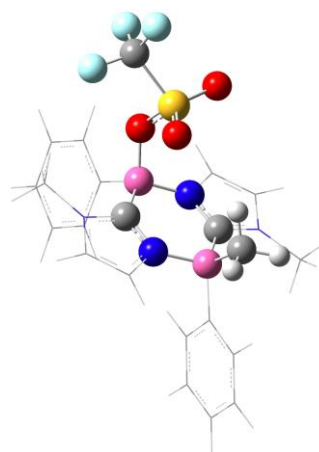

**3B** (0.2 kcal·mol<sup>-1</sup>)

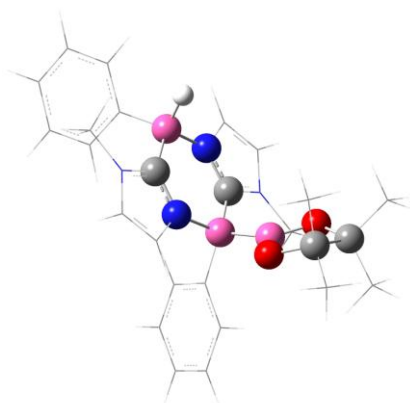

**4** (0.0 kcal·mol<sup>-1</sup>)

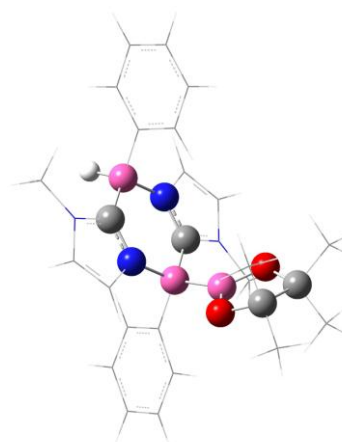

**4\*** (0.4 kcal·mol<sup>-1</sup>)

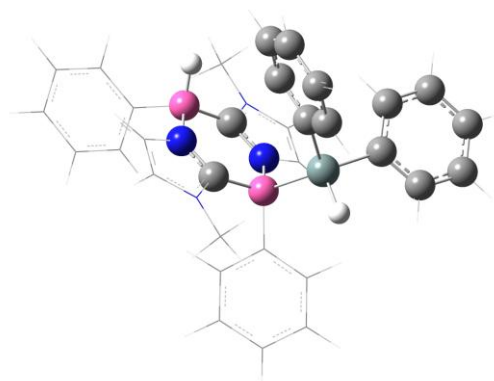

**5a** (0.0 kcal·mol<sup>-1</sup>)

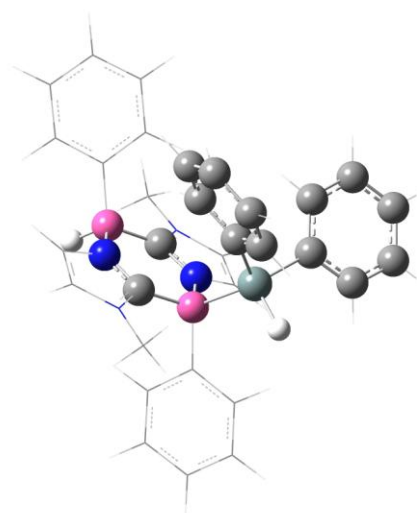

**5a\*** (1.8 kcal·mol<sup>-1</sup>)

**Supplementary Figure 57** | Structures and relative energies of **3A**, **3B**, **4**, **4\***, **5** and **5\***.

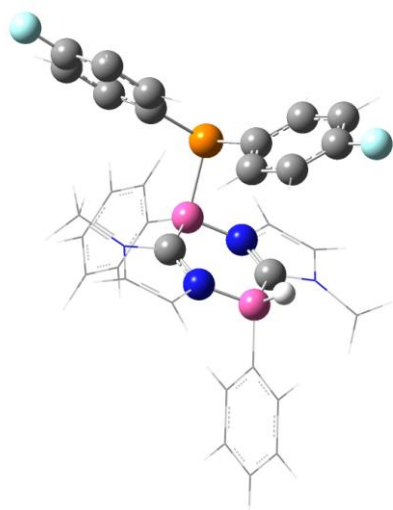

**6** (0.0 kcal·mol<sup>-1</sup>)

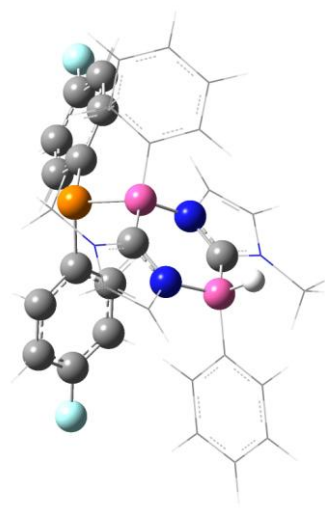

**6\*** (-0.9 kcal·mol<sup>-1</sup>)

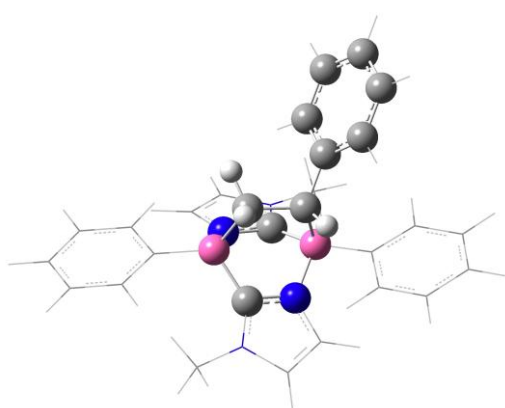

**8** (0.0 kcal·mol<sup>-1</sup>)

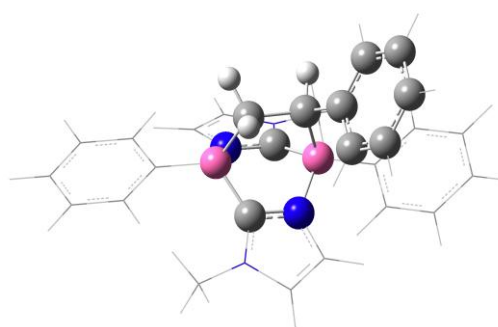

**8\*** (0.6 kcal·mol<sup>-1</sup>)

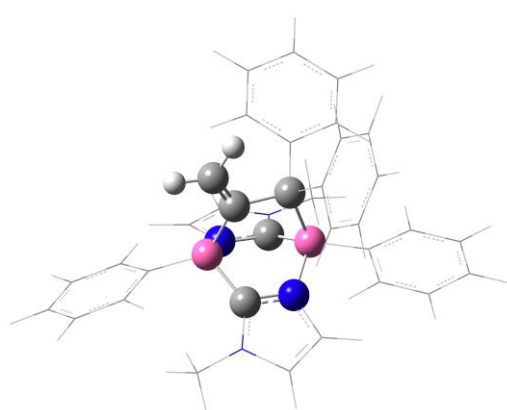

**9** (0.0 kcal·mol<sup>-1</sup>)

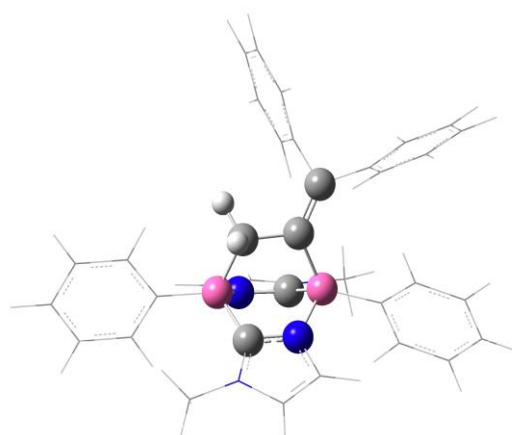

**9\*** (-7.9 kcal·mol<sup>-1</sup>)

**Supplementary Figure 58** | Structures and relative energies of **6**, **6\***, **8**, **8\***, **9** and **9\***.

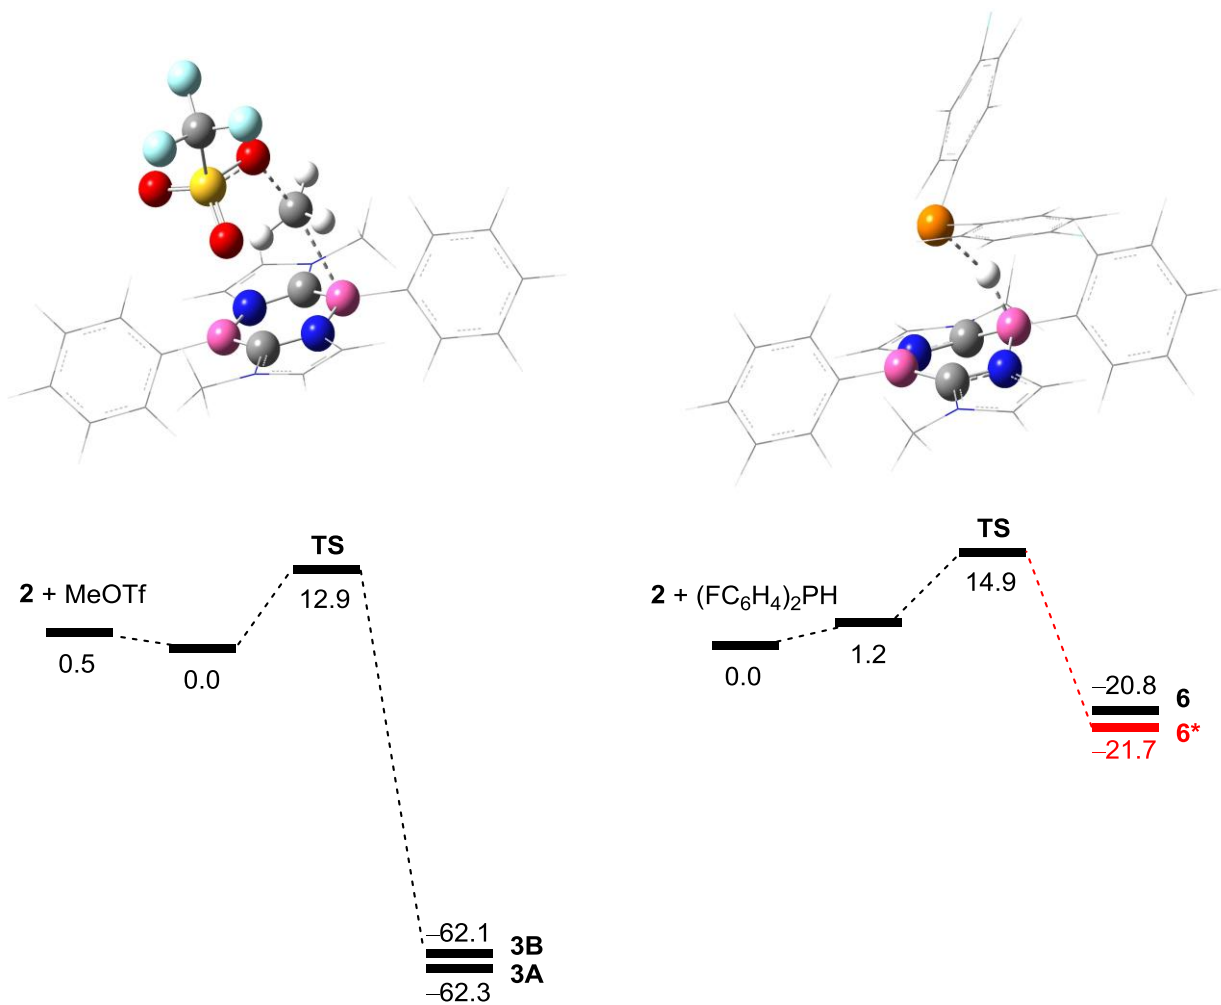

**Supplementary Figure 59** | DFT-calculated free energy profiles of concerted mechanism for the formation of **3B** and **6\*** from **2** with relative Gibbs free energies in kcal·mol<sup>-1</sup>.



## Supplementary Tables

**Supplementary Table 1.** Crystal Data and Structure Refinement of **1-4**.

| Compounds                                         | <b>1</b>                                                                      | <b>2</b>                                                      | <b>3</b>                                                                                      | <b>4</b>                                                                     |
|---------------------------------------------------|-------------------------------------------------------------------------------|---------------------------------------------------------------|-----------------------------------------------------------------------------------------------|------------------------------------------------------------------------------|
| Formula                                           | C <sub>20</sub> H <sub>20</sub> B <sub>2</sub> Cl <sub>2</sub> N <sub>4</sub> | C <sub>20</sub> H <sub>20</sub> B <sub>2</sub> N <sub>4</sub> | C <sub>22</sub> H <sub>23</sub> B <sub>2</sub> F <sub>3</sub> N <sub>4</sub> O <sub>3</sub> S | C <sub>26</sub> H <sub>33</sub> B <sub>3</sub> N <sub>4</sub> O <sub>2</sub> |
| Fw                                                | 408.92                                                                        | 338.02                                                        | 502.12                                                                                        | 465.99                                                                       |
| Cryst syst                                        | triclinic                                                                     | monoclinic                                                    | monoclinic                                                                                    | monoclinic                                                                   |
| Space group                                       | P -1                                                                          | C 1 2/c 1                                                     | P 1 21/c 1                                                                                    | C 1 2/c 1                                                                    |
| Size (mm <sup>3</sup> )                           | 0.150 x 0.180 x<br>0.300                                                      | 0.160 x 0.180 x<br>0.240                                      | 0.040 x 0.120 x<br>0.220                                                                      | 0.080 x 0.100 x<br>0.420                                                     |
| T, K                                              | 103(2)                                                                        | 103(2)                                                        | 153(2)                                                                                        | 103(2)                                                                       |
| a, Å                                              | 6.7243(2)                                                                     | 28.875(4)                                                     | 7.2251(7)                                                                                     | 29.987(3)                                                                    |
| b, Å                                              | 8.4506(4)                                                                     | 8.4730(15)                                                    | 14.5333(12)                                                                                   | 7.0147(7)                                                                    |
| c, Å                                              | 9.7798(4)                                                                     | 19.549(3)                                                     | 22.5468(19)                                                                                   | 25.999(3)                                                                    |
| α, deg                                            | 76.647(3)                                                                     | 90                                                            | 90                                                                                            | 90                                                                           |
| β, deg                                            | 85.978(2)                                                                     | 132.202(4)                                                    | 91.921(5)                                                                                     | 110.164(4)                                                                   |
| γ, deg                                            | 66.7788(19)                                                                   | 90                                                            | 90                                                                                            | 90                                                                           |
| V, Å <sup>3</sup>                                 | 496.77(3)                                                                     | 3543.0(10)                                                    | 2366.2(4)                                                                                     | 5133.7(9)                                                                    |
| Z                                                 | 1                                                                             | 8                                                             | 4                                                                                             | 8                                                                            |
| <i>d</i> <sub>calcd</sub> g·cm <sup>-3</sup>      | 1.367                                                                         | 1.267                                                         | 1.410                                                                                         | 1.206                                                                        |
| μ, mm <sup>-1</sup>                               | 0.340                                                                         | 0.075                                                         | 0.193                                                                                         | 0.075                                                                        |
| Refl collected                                    | 14248                                                                         | 17195                                                         | 23885                                                                                         | 23680                                                                        |
| <i>T</i> <sub>max</sub> / <i>T</i> <sub>min</sub> | 0.9510/0.9050                                                                 | 0.988/0.9820                                                  | 0.9920/0.9590                                                                                 | 0.9940/0.9690                                                                |
| N <sub>measd</sub>                                | 3279                                                                          | 4769                                                          | 4193                                                                                          | 4547                                                                         |
| [R <sub>int</sub> ]                               | 0.0641                                                                        | 0.0649                                                        | 0.1319                                                                                        | 0.0959                                                                       |
| <i>R</i> [I>2σ(I)]                                | 0.0475                                                                        | 0.0538                                                        | 0.0757                                                                                        | 0.0544                                                                       |
| <i>R</i> <sub>w</sub> [I>2σ(I)]                   | 0.1146                                                                        | 0.1094                                                        | 0.1838                                                                                        | 0.1129                                                                       |
| GOF                                               | 1.025                                                                         | 1.015                                                         | 1.016                                                                                         | 1.019                                                                        |
| Largest diff. peak/hole[e·Å <sup>-3</sup> ]       | 0.391/-0.367                                                                  | 0.340/-0.264                                                  | 0.305/-0.501                                                                                  | 0.271/-0.310                                                                 |

**Supplementary Table 2.** Crystal Data and Structure Refinement of **5a**, **6(C<sub>6</sub>H<sub>6</sub>)<sub>1</sub>**, **7**, **8**.

| Compounds                                         | <b>5a</b>                                                        | <b>6(C<sub>6</sub>H<sub>6</sub>)<sub>1</sub></b>                               | <b>7</b>                                                                     | <b>8</b>                                                      |
|---------------------------------------------------|------------------------------------------------------------------|--------------------------------------------------------------------------------|------------------------------------------------------------------------------|---------------------------------------------------------------|
| Formula                                           | C <sub>32</sub> H <sub>32</sub> B <sub>2</sub> N <sub>4</sub> Si | C <sub>35</sub> H <sub>32</sub> B <sub>2</sub> F <sub>2</sub> N <sub>4</sub> P | C <sub>21</sub> H <sub>20</sub> B <sub>2</sub> N <sub>4</sub> O <sub>2</sub> | C <sub>28</sub> H <sub>28</sub> B <sub>2</sub> N <sub>4</sub> |
| Fw                                                | 522.32                                                           | 599.23                                                                         | 382.03                                                                       | 442.16                                                        |
| Cryst syst                                        | monoclinic                                                       | triclinic                                                                      | orthorhombic                                                                 | monoclinic                                                    |
| Space group                                       | P 1 21/c 1                                                       | P -1                                                                           | P n a 21                                                                     | P 1 21/n 1                                                    |
| Size (mm <sup>3</sup> )                           | 0.020 x 0.180 x<br>0.340                                         | 0.280 x 0.320 x<br>0.400                                                       | 0.060 x 0.220 x<br>0.230                                                     | 0.100 x 0.220 x<br>0.400                                      |
| T, K                                              | 103(2)                                                           | 103(2)                                                                         | 103(2)                                                                       | 103(2)                                                        |
| <i>a</i> , Å                                      | 20.534(8)                                                        | 8.1150(8)                                                                      | 15.071(5)                                                                    | 8.2613(14)                                                    |
| <i>b</i> , Å                                      | 18.455(7)                                                        | 13.1620(13)                                                                    | 8.378(3)                                                                     | 23.616(4)                                                     |
| <i>c</i> , Å                                      | 7.417(3)                                                         | 16.2320(16)                                                                    | 14.966(5)                                                                    | 12.724(3)                                                     |
| α, deg                                            | 90                                                               | 106.603(3)                                                                     | 90                                                                           | 90                                                            |
| β, deg                                            | 94.979(9)                                                        | 102.639(3)                                                                     | 90                                                                           | 106.778(5)                                                    |
| γ, deg                                            | 90                                                               | 104.799(3)                                                                     | 90                                                                           | 90                                                            |
| V, Å <sup>3</sup>                                 | 2800.1(19)                                                       | 1524.6(3)                                                                      | 1889.7(11)                                                                   | 2376.8(8)                                                     |
| Z                                                 | 4                                                                | 2                                                                              | 4                                                                            | 4                                                             |
| <i>d</i> <sub>calcd</sub> g·cm <sup>-3</sup>      | 1.239                                                            | 1.305                                                                          | 1.343                                                                        | 1.236                                                         |
| μ, mm <sup>-1</sup>                               | 0.113                                                            | 0.135                                                                          | 0.087                                                                        | 0.073                                                         |
| Refl collected                                    | 34178                                                            | 43901                                                                          | 13022                                                                        | 20107                                                         |
| <i>T</i> <sub>max</sub> / <i>T</i> <sub>min</sub> | 0.9980/0.9630                                                    | 0.9630/0.9480                                                                  | 0.9950/0.9800                                                                | 0.9930/0.9720                                                 |
| N <sub>measd</sub>                                | 5355                                                             | 10572                                                                          | 3319                                                                         | 4672                                                          |
| [R] <sub>int</sub>                                | 0.2111                                                           | 0.1015                                                                         | 0.1858                                                                       | 0.1015                                                        |
| <i>R</i> [I>2σ(I)]                                | 0.0752                                                           | 0.0635                                                                         | 0.0847                                                                       | 0.0630                                                        |
| <i>R</i> <sub>w</sub> [I>2σ(I)]                   | 0.1387                                                           | 0.1222                                                                         | 0.1460                                                                       | 0.1307                                                        |
| GOF                                               | 0.989                                                            | 1.037                                                                          | 1.013                                                                        | 1.008                                                         |
| Largest diff.<br>peak/hole[e·Å <sup>-3</sup> ]    | 0.275/-0.367                                                     | 0.416/-0.391                                                                   | 0.255/-0.273                                                                 | 0.242/-0.262                                                  |

**Supplementary Table 3.** Crystal Data and Structure Refinement of **9**, **10**(C<sub>7</sub>H<sub>8</sub>)<sub>0.5</sub>, **11b**(THF).

| Compounds                                         | <b>9</b>                                                      | <b>10</b> ·(C <sub>7</sub> H <sub>8</sub> ) <sub>0.5</sub>         | <b>11b</b> ·(THF) <sub>1</sub>                                    |
|---------------------------------------------------|---------------------------------------------------------------|--------------------------------------------------------------------|-------------------------------------------------------------------|
| Formula                                           | C <sub>35</sub> H <sub>32</sub> B <sub>2</sub> N <sub>4</sub> | C <sub>31.50</sub> H <sub>29</sub> B <sub>2</sub> BrN <sub>4</sub> | C <sub>31</sub> H <sub>32</sub> B <sub>2</sub> ClN <sub>5</sub> O |
| Fw                                                | 530.26                                                        | 565.12                                                             | 547.68                                                            |
| Cryst syst                                        | monoclinic                                                    | monoclinic                                                         | monoclinic                                                        |
| Space group                                       | P 1 21 1                                                      | P 1 21/n 1                                                         | P 1 21/c 1                                                        |
| Size (mm <sup>3</sup> )                           | 0.300 x 0.320 x<br>0.420                                      | 0.100 x 0.160 x<br>0.200                                           | 0.060 x 0.120 x<br>0.240                                          |
| T, K                                              | 103(2)                                                        | 103(2)                                                             | 103(2)                                                            |
| <i>a</i> , Å                                      | 9.1900(10)                                                    | 7.4966(7)                                                          | 7.5717(11)                                                        |
| <i>b</i> , Å                                      | 30.098(3)                                                     | 14.1674(14)                                                        | 13.808(2)                                                         |
| <i>c</i> , Å                                      | 10.4179(11)                                                   | 26.033(2)                                                          | 27.350(4)                                                         |
| α, deg                                            | 90                                                            | 90                                                                 | 90                                                                |
| β, deg                                            | 102.688(3)                                                    | 95.734(3)                                                          | 96.647(5)                                                         |
| γ, deg                                            | 90                                                            | 90                                                                 | 90                                                                |
| V, Å <sup>3</sup>                                 | 2811.2(5)                                                     | 2751.1(5)                                                          | 2840.2(8)                                                         |
| Z                                                 | 4                                                             | 4                                                                  | 4                                                                 |
| <i>d</i> <sub>calcd</sub> g·cm <sup>-3</sup>      | 1.253                                                         | 1.364                                                              | 1.281                                                             |
| μ, mm <sup>-1</sup>                               | 0.073                                                         | 1.523                                                              | 0.169                                                             |
| Refl collected                                    | 26341                                                         | 39348                                                              | 14028                                                             |
| <i>T</i> <sub>max</sub> / <i>T</i> <sub>min</sub> | 0.9780/0.9700                                                 | 0.8630/0.7500                                                      | 0.9900/0.9610                                                     |
| N <sub>measd</sub>                                | 14158                                                         | 6552                                                               | 5258                                                              |
| [R] <sub>int</sub>                                | 0.0598                                                        | 0.1068                                                             | 0.0795                                                            |
| <i>R</i> [I>2σ(I)]                                | 0.0665                                                        | 0.0546                                                             | 0.0695                                                            |
| <i>R</i> <sub>w</sub> [I>2σ(I)]                   | 0.1485                                                        | 0.0985                                                             | 0.1359                                                            |
| GOF                                               | 1.009                                                         | 1.064                                                              | 1.024                                                             |
| Largest diff.<br>peak/hole[e·Å <sup>-3</sup> ]    | 0.389/-0.284                                                  | 0.567/-0.537                                                       | 0.290/-0.435                                                      |

**Supplementary Table 4.** Relative resonance stabilization energy calculation

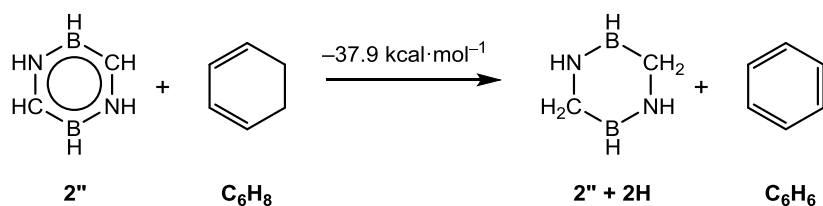

|                                   | E (au)      | ZPE (au) | E+ZPE (au)  |
|-----------------------------------|-------------|----------|-------------|
| <b>2''</b>                        | -239.163239 | 0.095022 | -239.068217 |
| <b>C<sub>6</sub>H<sub>8</sub></b> | -233.483882 | 0.121809 | -233.362073 |
| <b>2'' + 2H</b>                   | -240.396242 | 0.116549 | -240.279693 |
| <b>C<sub>6</sub>H<sub>6</sub></b> | -232.311245 | 0.100159 | -232.211086 |
|                                   |             |          |             |
| RSE (kcal/mol)                    | -37.9       |          | -38.0       |

**Supplementary Table 5.** The NPA charges of **2**.

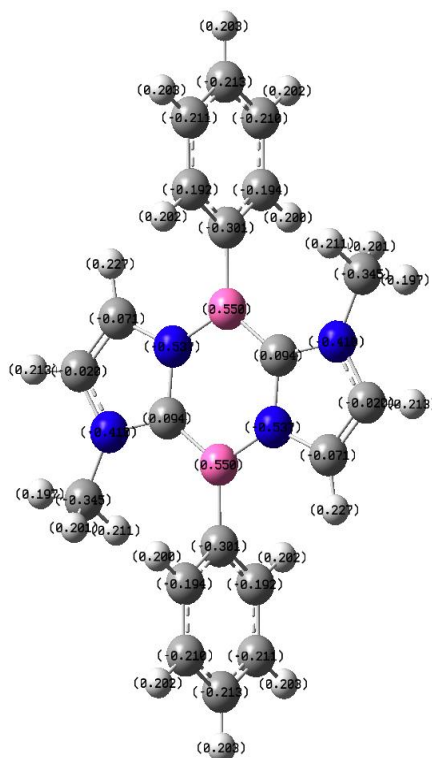

| Atom | No | Natural Charge | Core    | Valence | Rydberg | Total   |
|------|----|----------------|---------|---------|---------|---------|
| B    | 1  | 0.55035        | 1.99880 | 2.43350 | 0.01735 | 4.44965 |
| C    | 2  | 0.09396        | 1.99887 | 3.88105 | 0.02612 | 5.90604 |
| C    | 3  | -0.07061       | 1.99914 | 4.05032 | 0.02115 | 6.07061 |
| H    | 4  | 0.22688        | 0.00000 | 0.77166 | 0.00146 | 0.77312 |

|           |    |          |          |           |         |           |
|-----------|----|----------|----------|-----------|---------|-----------|
| C         | 5  | -0.01953 | 1.99914  | 4.00072   | 0.01967 | 6.01953   |
| H         | 6  | 0.21273  | 0.00000  | 0.78584   | 0.00143 | 0.78727   |
| C         | 7  | -0.34466 | 1.99934  | 4.33291   | 0.01242 | 6.34466   |
| H         | 8  | 0.19671  | 0.00000  | 0.80211   | 0.00118 | 0.80329   |
| H         | 9  | 0.21089  | 0.00000  | 0.78713   | 0.00197 | 0.78911   |
| H         | 10 | 0.20113  | 0.00000  | 0.79670   | 0.00218 | 0.79887   |
| C         | 11 | -0.30129 | 1.99900  | 4.28241   | 0.01988 | 6.30129   |
| C         | 12 | -0.19402 | 1.99908  | 4.17721   | 0.01773 | 6.19402   |
| H         | 13 | 0.20040  | 0.00000  | 0.79790   | 0.00170 | 0.79960   |
| C         | 14 | -0.20986 | 1.99914  | 4.19196   | 0.01876 | 6.20986   |
| H         | 15 | 0.20235  | 0.00000  | 0.79605   | 0.00160 | 0.79765   |
| C         | 16 | -0.21277 | 1.99915  | 4.19496   | 0.01866 | 6.21277   |
| H         | 17 | 0.20296  | 0.00000  | 0.79559   | 0.00145 | 0.79704   |
| C         | 18 | -0.21061 | 1.99915  | 4.19258   | 0.01888 | 6.21061   |
| H         | 19 | 0.20262  | 0.00000  | 0.79576   | 0.00162 | 0.79738   |
| C         | 20 | -0.19242 | 1.99908  | 4.17615   | 0.01718 | 6.19242   |
| H         | 21 | 0.20150  | 0.00000  | 0.79695   | 0.00156 | 0.79850   |
| N         | 22 | -0.53693 | 1.99923  | 5.52196   | 0.01573 | 7.53693   |
| N         | 23 | -0.40978 | 1.99925  | 5.39554   | 0.01498 | 7.40978   |
| C         | 24 | 0.09396  | 1.99887  | 3.88105   | 0.02612 | 5.90604   |
| B         | 25 | 0.55035  | 1.99880  | 2.43350   | 0.01735 | 4.44965   |
| N         | 26 | -0.53693 | 1.99923  | 5.52196   | 0.01573 | 7.53693   |
| N         | 27 | -0.40978 | 1.99925  | 5.39554   | 0.01498 | 7.40978   |
| C         | 28 | -0.30129 | 1.99900  | 4.28241   | 0.01988 | 6.30129   |
| C         | 29 | -0.07061 | 1.99914  | 4.05032   | 0.02115 | 6.07061   |
| C         | 30 | -0.01953 | 1.99914  | 4.00072   | 0.01967 | 6.01953   |
| C         | 31 | -0.34466 | 1.99934  | 4.33291   | 0.01242 | 6.34466   |
| C         | 32 | -0.19401 | 1.99908  | 4.17720   | 0.01773 | 6.19401   |
| C         | 33 | -0.19242 | 1.99908  | 4.17615   | 0.01718 | 6.19242   |
| H         | 34 | 0.22688  | 0.00000  | 0.77166   | 0.00146 | 0.77312   |
| H         | 35 | 0.21273  | 0.00000  | 0.78584   | 0.00143 | 0.78727   |
| H         | 36 | 0.19671  | 0.00000  | 0.80211   | 0.00118 | 0.80329   |
| H         | 37 | 0.21089  | 0.00000  | 0.78713   | 0.00197 | 0.78911   |
| H         | 38 | 0.20113  | 0.00000  | 0.79670   | 0.00218 | 0.79887   |
| H         | 39 | 0.20040  | 0.00000  | 0.79790   | 0.00170 | 0.79960   |
| C         | 40 | -0.20986 | 1.99914  | 4.19196   | 0.01876 | 6.20986   |
| C         | 41 | -0.21061 | 1.99915  | 4.19258   | 0.01888 | 6.21061   |
| H         | 42 | 0.20150  | 0.00000  | 0.79695   | 0.00156 | 0.79850   |
| H         | 43 | 0.20235  | 0.00000  | 0.79605   | 0.00160 | 0.79765   |
| C         | 44 | -0.21277 | 1.99915  | 4.19496   | 0.01866 | 6.21277   |
| H         | 45 | 0.20262  | 0.00000  | 0.79575   | 0.00162 | 0.79738   |
| H         | 46 | 0.20296  | 0.00000  | 0.79559   | 0.00145 | 0.79704   |
| =====     |    |          |          |           |         |           |
| * Total * |    | 0.00000  | 51.97675 | 125.51388 | 0.50937 | 178.00000 |

## Supplementary Table 6. Raw energy data.

### (a) Formation of **3B**

|                  | E [au]       | ZPE [au] | Gcorr [au] | Edisp [au] | E(SCRF) [au] | $\Delta G$ (w/o Edisp) [kcal/mol] | $\Delta G$ (w/ Edisp) [kcal/mol] |
|------------------|--------------|----------|------------|------------|--------------|-----------------------------------|----------------------------------|
| <b>2</b>         | -1043.229025 | 0.370255 | 0.316126   | -0.108983  | -1043.232870 |                                   |                                  |
| MeOTf            | -1001.528510 | 0.066268 | 0.030242   | -0.018546  | -1001.531984 |                                   |                                  |
| <b>2 + MeOTf</b> | -2044.757535 | 0.436523 | 0.346368   | -0.127529  | -2044.764854 | 0.0                               | 0.5                              |
| RC               | -2044.763433 | 0.437438 | 0.363227   | -0.141308  | -2044.768754 | 8.1                               | 0.0                              |
| TS- <b>3B</b>    | -2044.736154 | 0.435668 | 0.365274   | -0.146309  | -2044.745220 | 24.2                              | 12.9                             |
| <b>3B</b>        | -2044.859583 | 0.438709 | 0.372712   | -0.152146  | -2044.866313 | -47.1                             | -62.1                            |
| <b>3A</b>        | -2044.860686 | 0.438729 | 0.373132   | -0.152292  | -2044.867016 | -47.3                             | -62.3                            |

### (b) Formation of **4**

|                  | E [au]       | ZPE [au] | Gcorr [au] | Edisp [au] | E(SCRF) [au] | $\Delta G$ (w/o Edisp) [kcal/mol] | $\Delta G$ (w/ Edisp) [kcal/mol] |
|------------------|--------------|----------|------------|------------|--------------|-----------------------------------|----------------------------------|
| <b>2</b>         | -1043.229025 | 0.370255 | 0.316126   | -0.108983  | -1043.232870 |                                   |                                  |
| HBpin            | -411.987602  | 0.189404 | 0.156227   | -0.036377  | -411.989922  |                                   |                                  |
| <b>2 + HBpin</b> | -1455.216627 | 0.559659 | 0.472353   | -0.145360  | -1455.222792 | 0.0                               | 0.0                              |
| RC               | -1455.218219 | 0.560385 | 0.488846   | -0.154543  | -1455.223679 | 9.8                               | 4.0                              |
| TS- <b>4</b>     | -1455.181360 | 0.559012 | 0.495583   | -0.169056  | -1455.187213 | 36.9                              | 22.0                             |
| <b>4</b>         | -1455.241014 | 0.561751 | 0.494456   | -0.164307  | -1455.246579 | -1.1                              | -12.9                            |
| <b>4*</b>        | -1455.241411 | 0.562143 | 0.496233   | -0.164924  | -1455.247033 | -0.2                              | -12.5                            |

### (c) Formation of **5a**

|                                  | E [au]       | ZPE [au] | Gcorr [au] | Edisp [au] | E(SCRF) [au] | $\Delta G$ (w/o Edisp) [kcal/mol] | $\Delta G$ (w/ Edisp) [kcal/mol] |
|----------------------------------|--------------|----------|------------|------------|--------------|-----------------------------------|----------------------------------|
| <b>2</b>                         | -1043.229025 | 0.370255 | 0.316126   | -0.108983  | -1043.232870 |                                   |                                  |
| Ph <sub>2</sub> SiH <sub>2</sub> | -754.146726  | 0.197951 | 0.157549   | -0.053425  | -754.148637  |                                   |                                  |
| <b>2 + substrate</b>             | -1797.375751 | 0.568206 | 0.473675   | -0.162408  | -1797.381507 | 0.0                               | 0.0                              |
| RC                               | -1797.377001 | 0.568738 | 0.489124   | -0.173167  | -1797.382180 | 9.3                               | 2.5                              |
| TS- <b>5a</b>                    | -1797.340509 | 0.567725 | 0.497180   | -0.194173  | -1797.346572 | 36.7                              | 16.7                             |
| <b>5a</b>                        | -1797.398588 | 0.572108 | 0.501486   | -0.194300  | -1797.404261 | 3.2                               | -16.8                            |
| <b>5a*</b>                       | -1797.396976 | 0.572135 | 0.501889   | -0.193273  | -1797.402684 | 4.4                               | -15.0                            |

### (d) Formation of **6\***

|                                                        | E [au]       | ZPE [au] | Gcorr [au] | Edisp [au] | E(SCRF) [au] | $\Delta G$ (w/o Edisp) [kcal/mol] | $\Delta G$ (w/ Edisp) [kcal/mol] |
|--------------------------------------------------------|--------------|----------|------------|------------|--------------|-----------------------------------|----------------------------------|
| <b>2</b>                                               | -1043.229025 | 0.370255 | 0.316126   | -0.108983  | -1043.232870 |                                   |                                  |
| (FC <sub>6</sub> H <sub>4</sub> ) <sub>2</sub> PH      | -1003.926755 | 0.173859 | 0.131822   | -0.054273  | -1003.929661 |                                   |                                  |
| <b>2 + (FC<sub>6</sub>H<sub>4</sub>)<sub>2</sub>PH</b> | -2047.155780 | 0.544114 | 0.447948   | -0.163256  | -2047.162531 | 0.0                               | 0.0                              |
| RC                                                     | -2047.158100 | 0.544862 | 0.464108   | -0.175946  | -2047.164115 | 9.1                               | 1.2                              |
| TS- <b>6*</b>                                          | -2047.123454 | 0.542733 | 0.470198   | -0.193611  | -2047.130628 | 34.0                              | 14.9                             |
| <b>6*</b>                                              | -2047.181374 | 0.547777 | 0.476204   | -0.200318  | -2047.188327 | 1.5                               | -21.7                            |
| <b>6</b>                                               | -2047.183005 | 0.548143 | 0.478012   | -0.199325  | -2047.189700 | 1.8                               | -20.8                            |

### (e) Formation of **8** and **8\***

|                    | E [au]       | ZPE [au] | Gcorr [au] | Edisp [au] | E(SCRF) [au] | $\Delta G$ (w/o Edisp) [kcal/mol] | $\Delta G$ (w/ Edisp) [kcal/mol] |
|--------------------|--------------|----------|------------|------------|--------------|-----------------------------------|----------------------------------|
| <b>2</b>           | -1043.229025 | 0.370255 | 0.316126   | -0.108983  | -1043.232870 |                                   |                                  |
| styrene            | -309.730763  | 0.132766 | 0.101219   | -0.027609  | -309.732306  |                                   |                                  |
| <b>2 + styrene</b> | -1352.959788 | 0.503021 | 0.417345   | -0.136592  | -1352.965176 | 0.0                               | 0.0                              |
| RC                 | -1352.961548 | 0.503482 | 0.431967   | -0.146593  | -1352.966325 | 8.5                               | 2.2                              |
| TS- <b>8</b>       | -1352.940829 | 0.504400 | 0.442929   | -0.167506  | -1352.945744 | 28.2                              | 8.8                              |
| TS- <b>8*</b>      | -1352.940651 | 0.504497 | 0.443736   | -0.165048  | -1352.946034 | 28.6                              | 10.7                             |
| <b>8</b>           | -1352.993330 | 0.507888 | 0.447886   | -0.165025  | -1352.998306 | -1.6                              | -19.5                            |
| <b>8*</b>          | -1352.991823 | 0.507796 | 0.447185   | -0.164672  | -1352.996984 | -1.2                              | -18.9                            |

### (f) Formation of **9** and **9\***

|                                           | E [au]       | ZPE [au] | Gcorr [au] | Edisp [au] | E(SCRF) [au] | $\Delta G$ (w/o Edisp) [kcal/mol] | $\Delta G$ (w/ Edisp) [kcal/mol] |
|-------------------------------------------|--------------|----------|------------|------------|--------------|-----------------------------------|----------------------------------|
| <b>2</b>                                  | -1043.229025 | 0.370255 | 0.316126   | -0.108983  | -1043.232870 |                                   |                                  |
| H <sub>2</sub> CCCPh <sub>2</sub>         | -578.916410  | 0.217713 | 0.177842   | -0.058059  | -578.918521  |                                   |                                  |
| <b>2 + H<sub>2</sub>CCCPh<sub>2</sub></b> | -1622.145435 | 0.587968 | 0.493968   | -0.167043  | -1622.151391 | 0.0                               | 0.0                              |
| RC                                        | -1622.146926 | 0.588549 | 0.509678   | -0.177508  | -1622.152256 | 9.3                               | 2.7                              |
| TS- <b>9</b>                              | -1622.108712 | 0.590454 | 0.524008   | -0.210056  | -1622.114327 | 42.1                              | 15.1                             |
| TS- <b>9*</b>                             | -1622.110573 | 0.589074 | 0.518893   | -0.201598  | -1622.116154 | 37.8                              | 16.1                             |
| <b>9</b>                                  | -1622.163174 | 0.593918 | 0.528919   | -0.217056  | -1622.168582 | 11.1                              | -20.2                            |
| <b>9*</b>                                 | -1622.186882 | 0.593054 | 0.525636   | -0.202141  | -1622.192790 | -6.1                              | -28.1                            |

**Supplementary Table 7.** Calculated geometries (atom, x-, y-, z-positions in Å) utilized for mechanism study.

|           |           |           |           |                        |           |           |           |
|-----------|-----------|-----------|-----------|------------------------|-----------|-----------|-----------|
| === 2 === |           |           |           | H                      | 1.340791  | 1.425065  | 2.891748  |
| N         | -2.296552 | -0.800973 | -2.217042 | H                      | 0.422254  | 2.223249  | 4.185522  |
| C         | -1.167135 | -0.634504 | -2.979503 | H                      | 0.656865  | 3.034967  | 2.620880  |
| C         | -0.226824 | -0.006209 | -2.233746 | H                      | -3.349632 | -1.865744 | -3.651451 |
| N         | -0.744345 | 1.456581  | 2.651785  | H                      | -3.825142 | -2.221166 | -1.977145 |
| C         | -1.876517 | 1.297230  | 3.411693  | H                      | -4.339468 | -0.706951 | -2.735460 |
| C         | -2.827611 | 0.697898  | 2.655874  |                        |           |           |           |
| C         | -4.451253 | -0.656601 | 0.410739  | <b>Formation of 3B</b> |           |           |           |
| C         | 1.381342  | 1.389798  | -0.000089 | === MeOTf ===          |           |           |           |
| C         | 1.679555  | 2.753995  | -0.166660 | C                      | -0.932551 | -3.125756 | 1.445392  |
| C         | 2.991270  | 3.207668  | -0.310891 | O                      | -0.264319 | -4.340698 | 0.990227  |
| C         | 4.049715  | 2.300966  | -0.298019 | C                      | 1.288370  | -3.969686 | -1.170877 |
| C         | 3.783834  | 0.940630  | -0.144599 | F                      | 1.260242  | -2.652727 | -0.934411 |
| C         | 2.469274  | 0.497256  | -0.000371 | F                      | 1.406492  | -4.178429 | -2.478268 |
| C         | -5.530712 | 0.059712  | -0.136564 | F                      | 2.325581  | -4.504104 | -0.537023 |
| C         | -6.849478 | -0.372676 | 0.008947  | S                      | -0.323865 | -4.754902 | -0.569446 |
| C         | -7.128070 | -1.540798 | 0.716371  | O                      | -0.137999 | -6.182562 | -0.632916 |
| C         | -6.078726 | -2.266884 | 1.278836  | O                      | -1.407246 | -4.060456 | -1.235995 |
| C         | -4.764011 | -1.826608 | 1.127324  | H                      | -1.964472 | -3.111958 | 1.099869  |
| C         | 0.487921  | 2.070735  | 3.107960  | H                      | -0.888725 | -3.191910 | 2.529743  |
| C         | -3.523188 | -1.430742 | -2.666933 | H                      | -0.393952 | -2.246783 | 1.092717  |
| N         | -0.767105 | 0.232312  | -0.963490 |                        |           |           |           |
| B         | -0.107277 | 0.875559  | 0.161209  | === RC ===             |           |           |           |
| C         | -0.977755 | 0.956439  | 1.372381  | N                      | -2.025675 | 0.956504  | -3.042462 |
| N         | -2.290228 | 0.467354  | 1.382978  | C                      | -1.017007 | 1.272382  | -3.917853 |
| B         | -2.955454 | -0.162134 | 0.253344  | C                      | 0.069031  | 1.666913  | -3.211181 |
| C         | -2.079311 | -0.257648 | -0.952528 | N                      | 0.416608  | 1.878981  | 1.900785  |
| H         | -1.118083 | -0.979766 | -3.999256 | C                      | -0.588890 | 1.559478  | 2.777734  |
| H         | 0.775432  | 0.289672  | -2.485454 | C                      | -1.677535 | 1.176114  | 2.069573  |
| H         | -1.917855 | 1.621573  | 4.438630  | C                      | -3.712880 | 0.454153  | -0.124093 |
| H         | -3.832472 | 0.408810  | 2.905057  | C                      | 2.116711  | 2.350507  | -1.011602 |
| H         | 0.868065  | 3.475310  | -0.188545 | C                      | 2.404153  | 3.598187  | -1.596838 |
| H         | 3.186509  | 4.267612  | -0.437019 | C                      | 3.712333  | 4.001942  | -1.860911 |
| H         | 5.070728  | 2.649743  | -0.408991 | C                      | 4.780266  | 3.160717  | -1.549008 |
| H         | 4.600323  | 0.225974  | -0.133805 | C                      | 4.525494  | 1.916095  | -0.975894 |
| H         | 2.283795  | -0.565774 | 0.122983  | C                      | 3.213426  | 1.519978  | -0.714840 |
| H         | -5.335812 | 0.977627  | -0.683225 | C                      | -4.833069 | 1.255642  | -0.409218 |
| H         | -7.659024 | 0.204222  | -0.426221 | C                      | -6.133105 | 0.822027  | -0.147090 |
| H         | -8.151804 | -1.880243 | 0.831072  | C                      | -6.350093 | -0.433447 | 0.417756  |
| H         | -6.284267 | -3.177046 | 1.832781  | C                      | -5.257380 | -1.244736 | 0.723520  |
| H         | -3.960778 | -2.408676 | 1.569650  | C                      | -3.961403 | -0.803657 | 0.458724  |

|               |           |           |           |   |           |           |           |
|---------------|-----------|-----------|-----------|---|-----------|-----------|-----------|
| C             | 1.750493  | 2.299152  | 2.292210  | C | -0.514266 | 0.257897  | -2.529826 |
| C             | -3.336935 | 0.468133  | -3.424010 | N | -0.418049 | 0.681411  | 2.576680  |
| N             | -0.252409 | 1.606722  | -1.847085 | C | -1.443939 | 0.378538  | 3.427400  |
| B             | 0.629847  | 1.894488  | -0.728211 | C | -2.510823 | -0.024601 | 2.686278  |
| C             | -0.031796 | 1.682912  | 0.599624  | C | -4.440563 | -0.859503 | 0.415458  |
| N             | -1.354900 | 1.242057  | 0.709922  | C | 1.362773  | 1.161357  | -0.263054 |
| B             | -2.238128 | 0.945119  | -0.412389 | C | 1.581144  | 2.517393  | -0.565222 |
| C             | -1.578892 | 1.159704  | -1.735084 | C | 2.866379  | 3.017323  | -0.773866 |
| C             | 0.694964  | -1.814852 | -1.059070 | C | 3.966741  | 2.165582  | -0.688943 |
| O             | 1.524877  | -1.762940 | 0.148085  | C | 3.772453  | 0.816433  | -0.396826 |
| C             | 1.702141  | -3.976529 | 1.639480  | C | 2.486321  | 0.318463  | -0.186479 |
| F             | 1.334576  | -4.694135 | 0.572664  | C | -5.351062 | 0.180923  | 0.685980  |
| F             | 1.278756  | -4.585606 | 2.744635  | C | -6.710896 | -0.061374 | 0.873039  |
| F             | 3.027646  | -3.880412 | 1.665359  | C | -7.205353 | -1.363189 | 0.797835  |
| S             | 0.917139  | -2.259515 | 1.551628  | C | -6.327382 | -2.413323 | 0.539835  |
| O             | 1.537222  | -1.472978 | 2.591612  | C | -4.967212 | -2.160872 | 0.355926  |
| O             | -0.514909 | -2.459853 | 1.453140  | C | 0.950694  | 0.950849  | 3.009593  |
| H             | -1.148687 | 1.190547  | -4.984512 | C | -3.864196 | -1.078094 | -2.837608 |
| H             | 1.038710  | 1.983898  | -3.549764 | N | -0.901007 | 0.223991  | -1.181191 |
| H             | -0.450110 | 1.626705  | 3.843979  | B | -0.097209 | 0.615271  | -0.037791 |
| H             | -2.649079 | 0.862632  | 2.405010  | C | -0.827779 | 0.455722  | 1.280411  |
| H             | 1.587738  | 4.271814  | -1.840692 | N | -2.135454 | 0.007622  | 1.350642  |
| H             | 3.899270  | 4.974277  | -2.304846 | B | -2.907597 | -0.516212 | 0.200421  |
| H             | 5.799209  | 3.472239  | -1.751566 | C | -2.202541 | -0.288128 | -1.111298 |
| H             | 5.348606  | 1.251660  | -0.733997 | C | -1.485902 | -2.614323 | 0.397755  |
| H             | 3.036747  | 0.545055  | -0.271156 | O | -0.200145 | -3.963365 | 0.919766  |
| H             | -4.684312 | 2.243107  | -0.835928 | C | 1.551064  | -5.013226 | 2.581469  |
| H             | -6.975336 | 1.466468  | -0.377163 | F | 0.579353  | -5.458771 | 3.385223  |
| H             | -7.359137 | -0.774323 | 0.622883  | F | 2.633106  | -4.752683 | 3.325620  |
| H             | -5.414778 | -2.222427 | 1.167106  | F | 1.856630  | -5.972480 | 1.703724  |
| H             | -3.125073 | -1.450674 | 0.706425  | S | 1.010270  | -3.437231 | 1.692544  |
| H             | 2.477216  | 1.497217  | 2.142889  | O | 2.130314  | -3.064180 | 0.827727  |
| H             | 1.731658  | 2.566734  | 3.348799  | O | 0.638925  | -2.492097 | 2.752848  |
| H             | 2.060168  | 3.167592  | 1.710151  | H | -1.635613 | -0.321780 | -4.333490 |
| H             | -3.333453 | 0.263868  | -4.495038 | H | 0.458335  | 0.606396  | -2.826533 |
| H             | -3.575667 | -0.451600 | -2.886222 | H | -1.336083 | 0.459499  | 4.495911  |
| H             | -4.116391 | 1.202107  | -3.204233 | H | -3.492820 | -0.336837 | 2.992963  |
| H             | 0.456731  | -2.849966 | -1.301068 | H | 0.735882  | 3.196251  | -0.634577 |
| H             | -0.206964 | -1.222387 | -0.917879 | H | 3.007817  | 4.068498  | -1.001701 |
| H             | 1.326011  | -1.373668 | -1.825978 | H | 4.967752  | 2.550824  | -0.849819 |
|               |           |           |           | H | 4.622353  | 0.146038  | -0.330013 |
|               |           |           |           | H | 2.363743  | -0.734937 | 0.045884  |
| === TS-3B === |           |           |           | H | -4.988808 | 1.203246  | 0.743968  |
| N             | -2.588603 | -0.523103 | -2.415705 | H | -7.384647 | 0.764859  | 1.074009  |
| C             | -1.547570 | -0.201917 | -3.266547 |   |           |           |           |



|            |           |           |           |            |           |           |           |
|------------|-----------|-----------|-----------|------------|-----------|-----------|-----------|
| H          | -8.262513 | -1.556343 | 0.942620  | F          | 4.707203  | -1.931022 | 0.239123  |
| H          | -6.698583 | -3.431290 | 0.487770  | F          | 3.663109  | -2.458489 | -1.593028 |
| H          | -4.306299 | -2.999674 | 0.165458  | S          | 2.051586  | -2.010938 | 0.480653  |
| H          | 1.539489  | 0.033257  | 2.954594  | O          | 2.169996  | -0.523070 | 0.011201  |
| H          | 0.920279  | 1.303345  | 4.040297  | O          | 2.200010  | -2.119992 | 1.924255  |
| H          | 1.399112  | 1.716875  | 2.380776  | H          | -0.228634 | -0.587434 | -4.610713 |
| H          | -3.937860 | -0.991336 | -3.921372 | H          | 1.779861  | 0.252069  | -2.910378 |
| H          | -3.948067 | -2.131982 | -2.558393 | H          | -0.824075 | 0.938558  | 4.180240  |
| H          | -4.688442 | -0.532478 | -2.378771 | H          | -2.873856 | 0.188159  | 2.484745  |
| H          | -1.833401 | -3.229152 | -0.416141 | H          | -0.079337 | 3.059104  | -0.341840 |
| H          | -1.997894 | -2.651183 | 1.343064  | H          | 0.968451  | 5.241713  | -0.749721 |
| H          | -0.738609 | -1.865694 | 0.210649  | H          | 3.428514  | 5.411174  | -1.059326 |
|            |           |           |           | H          | 4.819749  | 3.357375  | -0.948173 |
|            |           |           |           | H          | 3.770249  | 1.168808  | -0.530085 |
| === 3B === |           |           |           | H          | -2.213051 | 2.345105  | -1.131416 |
| N          | -1.373771 | -0.553120 | -2.779940 | H          | -4.098340 | 3.886903  | -1.423765 |
| C          | -0.231724 | -0.399474 | -3.550925 | H          | -6.417837 | 3.137064  | -0.936632 |
| C          | 0.750936  | 0.007563  | -2.713661 | H          | -6.809580 | 0.812056  | -0.154072 |
| N          | 0.316528  | 0.819677  | 2.358857  | H          | -4.923632 | -0.733239 | 0.135356  |
| C          | -0.826068 | 0.728816  | 3.124479  | H          | 2.182152  | 0.179703  | 3.085248  |
| C          | -1.828961 | 0.350783  | 2.286973  | H          | 1.536894  | 1.677921  | 3.812889  |
| C          | -3.400470 | 0.670891  | -0.462005 | H          | 2.205714  | 1.707588  | 2.169516  |
| C          | 1.759806  | 1.930014  | -0.412253 | H          | -2.766097 | -0.652145 | -4.329303 |
| C          | 0.997334  | 3.108181  | -0.476804 | H          | -2.698901 | -2.105794 | -3.302373 |
| C          | 1.585202  | 4.350197  | -0.706816 | H          | -3.462660 | -0.614090 | -2.699476 |
| C          | 2.965872  | 4.446814  | -0.880040 | H          | -3.126874 | -2.329630 | -0.738826 |
| C          | 3.744517  | 3.293703  | -0.817784 | H          | -3.133538 | -1.975367 | 0.979605  |
| C          | 3.146752  | 2.053728  | -0.584267 | H          | -1.647823 | -2.513440 | 0.200671  |
| C          | -3.216247 | 1.992661  | -0.907083 |            |           |           |           |
| C          | -4.281531 | 2.874669  | -1.077756 |            |           |           |           |
| C          | -5.584156 | 2.455723  | -0.805704 | === 3A === |           |           |           |
| C          | -5.801132 | 1.151951  | -0.367072 | B          | -2.182572 | -1.203385 | -0.052388 |
| C          | -4.723237 | 0.278487  | -0.201698 | B          | 1.023351  | -0.653655 | 0.008066  |
| C          | 1.649056  | 1.111096  | 2.889242  | C          | -2.571015 | -2.781343 | -0.215786 |
| C          | -2.655454 | -1.015084 | -3.307303 | C          | -3.462218 | -0.206449 | 0.131098  |
| N          | 0.207853  | 0.089784  | -1.441901 | C          | -4.772667 | -0.685771 | 0.289663  |
| B          | 1.022638  | 0.509046  | -0.182143 | C          | -5.857590 | 0.175555  | 0.472854  |
| C          | 0.015812  | 0.489988  | 1.075603  | C          | -5.657021 | 1.553343  | 0.501290  |
| N          | -1.295121 | 0.201854  | 1.025975  | C          | -4.365459 | 2.058259  | 0.346552  |
| B          | -2.129092 | -0.335450 | -0.234212 | C          | -3.289924 | 1.190384  | 0.165701  |
| C          | -1.095808 | -0.258172 | -1.487019 | C          | -1.228724 | -0.761294 | -1.294213 |
| C          | -2.532654 | -1.884730 | 0.066953  | C          | -2.947610 | -0.743151 | -3.132059 |
| O          | 0.987483  | -2.731340 | -0.198514 | C          | -0.481102 | -0.337485 | -3.365000 |
| C          | 3.675646  | -2.610240 | -0.266341 | C          | 0.582641  | -0.333226 | -2.528095 |
| F          | 3.823430  | -3.904474 | 0.021010  | C          | 0.068490  | -0.859104 | 1.289700  |

|   |           |           |           | Formation of 4  |           |           |           |
|---|-----------|-----------|-----------|-----------------|-----------|-----------|-----------|
| C | 1.798241  | -0.652151 | 3.111738  | ==== HBpin ==== |           |           |           |
| C | -0.662872 | -1.095603 | 3.380901  | B               | 1.040554  | -2.152497 | -1.180585 |
| C | -1.723981 | -1.207400 | 2.537527  | C               | 2.811280  | -1.668760 | 0.181719  |
| C | 2.172316  | -1.779667 | -0.145618 | C               | 4.071888  | -2.298765 | -0.419908 |
| C | 1.810448  | -3.136059 | -0.202889 | C               | 3.183815  | -0.458390 | 1.031666  |
| C | 2.762366  | -4.142118 | -0.352333 | C               | 1.853755  | -2.713831 | 0.880484  |
| C | 4.114974  | -3.814736 | -0.448699 | C               | 2.542610  | -3.955816 | 1.436892  |
| C | 4.499277  | -2.477391 | -0.394183 | C               | 0.942095  | -2.094000 | 1.945197  |
| C | 3.538307  | -1.475696 | -0.242945 | O               | 1.999677  | -1.208631 | -0.945236 |
| C | 2.549737  | 3.120163  | -0.427845 | O               | 0.983640  | -3.123671 | -0.221547 |
| F | 2.548271  | 2.851113  | -1.736060 | H               | 0.326863  | -2.130692 | -2.125101 |
| F | 3.755352  | 2.842867  | 0.071901  | H               | 3.829815  | -3.159527 | -1.046636 |
| F | 2.291822  | 4.416544  | -0.250992 | H               | 4.769664  | -2.618963 | 0.357557  |
| N | -1.598469 | -0.603774 | -2.588380 | H               | 4.571569  | -1.556705 | -1.045947 |
| N | 0.110235  | -0.591625 | -1.252070 | H               | 3.819523  | 0.212244  | 0.449590  |
| N | 0.449696  | -0.887928 | 2.593328  | H               | 3.740518  | -0.765181 | 1.921780  |
| N | -1.258736 | -1.060508 | 1.249368  | H               | 2.303400  | 0.101345  | 1.346147  |
| O | 1.785904  | 0.703221  | 0.103545  | H               | 1.793843  | -4.623666 | 1.868315  |
| O | -0.035729 | 2.403798  | -0.228769 | H               | 3.250710  | -3.686150 | 2.225686  |
| O | 1.356309  | 2.408182  | 1.870668  | H               | 3.075756  | -4.504290 | 0.660851  |
| S | 1.217394  | 2.117336  | 0.451676  | H               | 0.427082  | -1.209918 | 1.564055  |
| H | -1.684155 | -3.414998 | -0.327810 | H               | 1.503488  | -1.811664 | 2.839054  |
| H | -3.207425 | -2.968888 | -1.087754 | H               | 0.185884  | -2.827803 | 2.231223  |
| H | -3.118175 | -3.155798 | 0.657116  | ==== RC ====    |           |           |           |
| H | -4.960061 | -1.754572 | 0.268239  | B               | -1.988350 | 0.148304  | 0.321433  |
| H | -6.856814 | -0.230829 | 0.592992  | B               | 0.347306  | 1.834073  | -0.637200 |
| H | -6.495685 | 2.226716  | 0.642561  | B               | 2.605692  | -2.484056 | -1.782302 |
| H | -4.195206 | 3.129754  | 0.368080  | C               | -3.186551 | -0.686368 | 0.929962  |
| H | -2.296264 | 1.612139  | 0.051722  | C               | -3.119203 | -2.083327 | 1.081311  |
| H | -3.097747 | -1.750476 | -3.526288 | C               | -4.175592 | -2.817117 | 1.622020  |
| H | -3.081011 | -0.016933 | -3.934228 | C               | -5.337793 | -2.168652 | 2.035615  |
| H | -3.675027 | -0.544074 | -2.349656 | C               | -5.430303 | -0.782890 | 1.906867  |
| H | -0.550092 | -0.169089 | -4.425848 | C               | -4.369347 | -0.058590 | 1.364639  |
| H | 1.625807  | -0.159465 | -2.725161 | C               | -1.511385 | 0.171689  | -1.095711 |
| H | 2.528872  | -1.098896 | 2.440538  | C               | -3.115410 | -1.361373 | -2.316624 |
| H | 1.878308  | -1.124512 | 4.090305  | C               | -1.207500 | -0.083369 | -3.314817 |
| H | 1.983831  | 0.418960  | 3.196842  | C               | -0.255347 | 0.776743  | -2.882277 |
| H | -0.602552 | -1.134973 | 4.454860  | C               | -0.127652 | 1.807294  | 0.779405  |
| H | -2.767175 | -1.363091 | 2.749779  | C               | 1.467687  | 3.354734  | 1.994329  |
| H | 0.763554  | -3.416435 | -0.130801 | C               | -0.432033 | 2.067761  | 2.998905  |
| H | 2.450409  | -5.180437 | -0.392509 | C               | -1.381112 | 1.202275  | 2.569034  |
| H | 4.859602  | -4.594708 | -0.564274 | C               | 1.524263  | 2.693446  | -1.251966 |
| H | 5.548362  | -2.210607 | -0.467938 |                 |           |           |           |
| H | 3.857781  | -0.440956 | -0.197793 |                 |           |           |           |

|   |           |           |           |              |           |           |           |
|---|-----------|-----------|-----------|--------------|-----------|-----------|-----------|
| C | 1.406362  | 4.085180  | -1.420753 | H            | 2.104797  | -5.090184 | 1.203415  |
| C | 2.435623  | 4.849043  | -1.972038 | H            | 3.332041  | -4.217004 | 2.130372  |
| C | 3.619487  | 4.235626  | -2.378075 | H            | 3.751605  | -4.968612 | 0.579006  |
| C | 3.760135  | 2.855731  | -2.231876 | H            | 1.006597  | -1.625298 | 0.569722  |
| C | 2.727070  | 2.098633  | -1.679064 | H            | 1.521808  | -2.301499 | 2.125721  |
| C | 3.737236  | -2.112205 | 0.170139  | H            | 0.515872  | -3.258817 | 1.029173  |
| C | 5.119799  | -2.763409 | 0.057646  |              |           |           |           |
| C | 3.781789  | -0.950592 | 1.157472  | === TS-4 === |           |           |           |
| C | 2.566921  | -3.147013 | 0.405341  | B            | -1.764448 | -0.381661 | 0.088384  |
| C | 2.972537  | -4.432263 | 1.120058  | B            | 0.539337  | 1.290564  | -0.463364 |
| C | 1.332850  | -2.535920 | 1.075529  | B            | 1.179551  | -0.624614 | 0.124555  |
| N | -1.984272 | -0.455936 | -2.245571 | C            | -2.844618 | -1.469924 | 0.475397  |
| N | -0.424464 | 0.954967  | -1.503857 | C            | -2.579730 | -2.842936 | 0.336016  |
| N | 0.342497  | 2.441722  | 1.929014  | C            | -3.538894 | -3.807727 | 0.642892  |
| N | -1.213062 | 1.020873  | 1.189801  | C            | -4.797879 | -3.423259 | 1.101375  |
| O | 3.421099  | -1.581493 | -1.157731 | C            | -5.086796 | -2.067659 | 1.251717  |
| O | 2.173025  | -3.487144 | -0.963377 | C            | -4.121617 | -1.109115 | 0.943590  |
| H | 2.308772  | -2.405252 | -2.925594 | C            | -1.478006 | 0.079531  | -1.352330 |
| H | -2.218976 | -2.606961 | 0.774331  | C            | -3.169470 | -1.099313 | -2.809654 |
| H | -4.089623 | -3.894043 | 1.724320  | C            | -1.268094 | 0.365819  | -3.558248 |
| H | -6.161411 | -2.735564 | 2.455865  | C            | -0.269681 | 1.059368  | -2.949033 |
| H | -6.330757 | -0.267432 | 2.224674  | C            | -0.237989 | 1.420867  | 0.865059  |
| H | -4.465325 | 1.018925  | 1.267142  | C            | 1.219561  | 2.854935  | 2.342947  |
| H | -2.893949 | -2.316574 | -1.833353 | C            | -0.809495 | 1.552701  | 3.035274  |
| H | -3.350205 | -1.541144 | -3.366001 | C            | -1.679899 | 0.704411  | 2.443824  |
| H | -3.986820 | -0.923285 | -1.827310 | C            | 1.661572  | 2.328429  | -0.940037 |
| H | -1.396163 | -0.457655 | -4.307597 | C            | 1.428999  | 3.716070  | -0.878202 |
| H | 0.520474  | 1.284204  | -3.426034 | C            | 2.356222  | 4.645286  | -1.349655 |
| H | 2.343022  | 2.918461  | 1.510022  | C            | 3.554153  | 4.209816  | -1.914563 |
| H | 1.699201  | 3.546057  | 3.042552  | C            | 3.803661  | 2.841868  | -2.009829 |
| H | 1.242513  | 4.303400  | 1.499902  | C            | 2.869939  | 1.920541  | -1.532666 |
| H | -0.243848 | 2.443439  | 3.991417  | C            | 2.981884  | -2.070084 | -0.088553 |
| H | -2.153009 | 0.692319  | 3.116213  | C            | 2.392133  | -3.488481 | -0.093801 |
| H | 0.486564  | 4.580127  | -1.123037 | C            | 4.321898  | -2.069405 | -0.821926 |
| H | 2.310898  | 5.920595  | -2.090034 | C            | 3.002422  | -1.413933 | 1.347390  |
| H | 4.421931  | 4.825414  | -2.808042 | C            | 3.135628  | -2.404172 | 2.504858  |
| H | 4.676342  | 2.367002  | -2.546966 | C            | 4.058987  | -0.309796 | 1.496521  |
| H | 2.864344  | 1.026708  | -1.572045 | N            | -2.019967 | -0.237170 | -2.570682 |
| H | 5.117502  | -3.587311 | -0.658969 | N            | -0.404022 | 0.880403  | -1.583070 |
| H | 5.463051  | -3.142760 | 1.023111  | N            | 0.076933  | 1.995597  | 2.067893  |
| H | 5.834427  | -2.015149 | -0.291285 | N            | -1.339547 | 0.626078  | 1.093583  |
| H | 4.601289  | -0.279094 | 0.892105  | O            | 2.054837  | -1.219869 | -0.806770 |
| H | 3.957972  | -1.314691 | 2.173797  | O            | 1.700144  | -0.792211 | 1.424178  |
| H | 2.856122  | -0.376064 | 1.147033  | H            | -0.093421 | -0.948820 | 0.023173  |

|           |           |           |           |   |           |           |           |
|-----------|-----------|-----------|-----------|---|-----------|-----------|-----------|
| H         | -1.601225 | -3.158859 | -0.010590 | C | -2.752801 | -2.486569 | -2.400427 |
| H         | -3.301322 | -4.860282 | 0.529498  | C | -0.643051 | -1.309752 | -3.139073 |
| H         | -5.545107 | -4.171513 | 1.342099  | C | 0.308572  | -0.574746 | -2.508358 |
| H         | -6.063875 | -1.756746 | 1.606670  | C | -0.074333 | 0.240411  | 1.285104  |
| H         | -4.373853 | -0.058716 | 1.058753  | C | 1.344093  | 1.743954  | 2.722925  |
| H         | -2.891486 | -2.153772 | -2.743300 | C | -0.775022 | 0.560950  | 3.388607  |
| H         | -3.558611 | -0.892306 | -3.806647 | C | -1.650547 | -0.270644 | 2.769418  |
| H         | -3.946694 | -0.898238 | -2.074485 | C | 0.953203  | 1.858522  | -0.588755 |
| H         | -1.515349 | 0.265350  | -4.601485 | C | -0.155212 | 2.725989  | -0.577868 |
| H         | 0.515060  | 1.662767  | -3.368893 | C | -0.074138 | 4.038334  | -1.039972 |
| H         | 2.112424  | 2.451927  | 1.868161  | C | 1.133691  | 4.531999  | -1.534616 |
| H         | 1.374667  | 2.883748  | 3.421438  | C | 2.247935  | 3.697292  | -1.563296 |
| H         | 1.054420  | 3.870227  | 1.977536  | C | 2.151974  | 2.383946  | -1.096846 |
| H         | -0.742139 | 1.883397  | 4.057786  | C | 4.161818  | -1.808424 | -0.387131 |
| H         | -2.495151 | 0.142210  | 2.861427  | C | 3.713172  | -3.274349 | -0.423163 |
| H         | 0.493010  | 4.078959  | -0.462839 | C | 5.375794  | -1.615783 | -1.292545 |
| H         | 2.141124  | 5.707142  | -1.283740 | C | 4.314060  | -1.232224 | 1.072877  |
| H         | 4.279140  | 4.927555  | -2.283376 | C | 4.635843  | -2.266382 | 2.148867  |
| H         | 4.727245  | 2.490429  | -2.458939 | C | 5.295824  | -0.058208 | 1.170743  |
| H         | 3.070963  | 0.859534  | -1.627071 | N | -1.567636 | -1.668287 | -2.172900 |
| H         | 1.430772  | -3.516175 | 0.423095  | N | -0.035303 | -0.490850 | -1.171782 |
| H         | 3.062756  | -4.210644 | 0.379633  | N | 0.200066  | 0.873659  | 2.458236  |
| H         | 2.229768  | -3.796695 | -1.129293 | N | -1.210209 | -0.457888 | 1.474275  |
| H         | 4.193698  | -2.506936 | -1.815117 | O | 3.058690  | -1.018708 | -0.917907 |
| H         | 5.063386  | -2.666513 | -0.282368 | O | 2.983189  | -0.694831 | 1.332365  |
| H         | 4.714267  | -1.060100 | -0.945837 | H | -3.095505 | -0.925587 | 0.297457  |
| H         | 3.115141  | -1.860614 | 3.452635  | H | 0.119244  | -3.234859 | 0.804912  |
| H         | 4.082488  | -2.950226 | 2.448739  | H | 0.036752  | -5.572241 | 1.566628  |
| H         | 2.316383  | -3.122704 | 2.513520  | H | -2.140368 | -6.631824 | 2.121835  |
| H         | 3.987806  | 0.424682  | 0.692840  | H | -4.234525 | -5.313526 | 1.901585  |
| H         | 5.073264  | -0.718218 | 1.508309  | H | -4.147780 | -2.969482 | 1.134655  |
| H         | 3.891809  | 0.207822  | 2.444497  | H | -2.582056 | -3.515435 | -2.078464 |
|           |           |           |           | H | -2.991429 | -2.470426 | -3.463733 |
| === 4 === |           |           |           | H | -3.591144 | -2.077394 | -1.837877 |
| B         | -1.963473 | -1.355108 | 0.416908  | H | -0.748070 | -1.602409 | -4.169625 |
| B         | 0.802583  | 0.308832  | -0.073117 | H | 1.197068  | -0.108500 | -2.894867 |
| B         | 2.326328  | -0.489110 | 0.129519  | H | 2.268735  | 1.178691  | 2.615223  |
| C         | -2.010549 | -2.905435 | 0.905222  | H | 1.258567  | 2.118829  | 3.742364  |
| C         | -0.844407 | -3.679288 | 1.040027  | H | 1.346257  | 2.584038  | 2.028706  |
| C         | -0.883188 | -5.003717 | 1.472590  | H | -0.754355 | 0.953308  | 4.390681  |
| C         | -2.105127 | -5.601309 | 1.784821  | H | -2.541769 | -0.746948 | 3.139229  |
| C         | -3.278284 | -4.860313 | 1.659783  | H | -1.108896 | 2.365915  | -0.200800 |
| C         | -3.223773 | -3.533805 | 1.225757  | H | -0.951584 | 4.676865  | -1.015641 |
| C         | -1.180872 | -1.164876 | -0.972192 | H | 1.202815  | 5.553081  | -1.894185 |

|            |           |           |           |                                          |           |           |           |
|------------|-----------|-----------|-----------|------------------------------------------|-----------|-----------|-----------|
| H          | 3.192747  | 4.066591  | -1.949613 | C                                        | 3.482464  | -3.208504 | 1.083466  |
| H          | 3.033862  | 1.752132  | -1.142092 | N                                        | -1.720322 | -1.828426 | -1.941234 |
| H          | 2.835899  | -3.437922 | 0.205593  | N                                        | -0.129742 | -0.542846 | -1.197361 |
| H          | 4.508063  | -3.948147 | -0.093487 | N                                        | 0.403162  | 1.171344  | 2.243071  |
| H          | 3.444593  | -3.534821 | -1.449041 | N                                        | -1.057063 | -0.275314 | 1.528455  |
| H          | 5.154816  | -2.014431 | -2.285315 | O                                        | 3.390353  | -0.028293 | 0.688056  |
| H          | 6.245278  | -2.151009 | -0.899725 | O                                        | 2.595995  | -1.732410 | -0.592466 |
| H          | 5.635407  | -0.563117 | -1.402964 | H                                        | -3.024756 | -0.893428 | 0.588030  |
| H          | 4.691046  | -1.774677 | 3.122866  | H                                        | 0.226419  | -3.188183 | 0.799376  |
| H          | 5.601992  | -2.742115 | 1.956296  | H                                        | 0.269031  | -5.433648 | 1.804595  |
| H          | 3.871038  | -3.040296 | 2.206415  | H                                        | -1.771381 | -6.369300 | 2.868063  |
| H          | 5.071651  | 0.715578  | 0.433995  | H                                        | -3.857621 | -5.020925 | 2.910194  |
| H          | 6.329065  | -0.384683 | 1.028990  | H                                        | -3.898133 | -2.770205 | 1.899708  |
| H          | 5.214870  | 0.389643  | 2.163863  | H                                        | -2.638953 | -3.710331 | -1.687020 |
| === 4* === |           |           |           | H                                        | -3.297752 | -2.692284 | -2.994265 |
| B          | -1.876241 | -1.291987 | 0.638188  | H                                        | -3.648520 | -2.305630 | -1.295834 |
| B          | 0.806264  | 0.338675  | -0.257818 | H                                        | -1.100503 | -1.918439 | -4.007799 |
| B          | 2.313370  | -0.491937 | -0.054730 | H                                        | 0.909772  | -0.276474 | -3.064771 |
| C          | -1.839730 | -2.786460 | 1.275023  | H                                        | 2.403048  | 1.679683  | 1.861181  |
| C          | -0.676044 | -3.575710 | 1.264310  | H                                        | 1.703935  | 2.362135  | 3.344314  |
| C          | -0.645866 | -4.849843 | 1.830021  | H                                        | 1.256257  | 3.036833  | 1.757560  |
| C          | -1.790845 | -5.378022 | 2.427777  | H                                        | -0.404624 | 1.466724  | 4.220981  |
| C          | -2.959813 | -4.620175 | 2.450132  | H                                        | -2.249096 | -0.385231 | 3.316187  |
| C          | -2.976759 | -3.345898 | 1.878793  | H                                        | -1.202501 | 2.206200  | -0.794970 |
| C          | -1.231983 | -1.217436 | -0.830664 | H                                        | -1.120307 | 4.440328  | -1.812430 |
| C          | -2.895208 | -2.690667 | -1.981141 | H                                        | 1.049830  | 5.399962  | -2.555114 |
| C          | -0.903828 | -1.537822 | -3.020287 | H                                        | 3.133916  | 4.081907  | -2.252243 |
| C          | 0.084019  | -0.734315 | -2.549285 | H                                        | 3.053279  | 1.857038  | -1.212378 |
| C          | 0.046181  | 0.410102  | 1.172037  | H                                        | 4.915162  | -0.115956 | -1.520877 |
| C          | 1.511350  | 2.124056  | 2.298094  | H                                        | 6.350217  | -0.797521 | -0.734498 |
| C          | -0.494537 | 0.961406  | 3.274783  | H                                        | 5.703658  | 0.763455  | -0.206092 |
| C          | -1.399762 | 0.055985  | 2.824270  | H                                        | 5.704873  | -0.069622 | 2.082751  |
| C          | 0.919526  | 1.832953  | -0.920230 | H                                        | 6.122405  | -1.745021 | 1.702555  |
| C          | -0.241448 | 2.606872  | -1.106823 | H                                        | 4.640276  | -1.378916 | 2.605007  |
| C          | -0.203197 | 3.873693  | -1.685746 | H                                        | 4.030441  | -3.838519 | -1.454784 |
| C          | 1.013810  | 4.414378  | -2.103363 | H                                        | 5.579023  | -3.313942 | -0.779418 |
| C          | 2.180348  | 3.673732  | -1.932209 | H                                        | 4.764206  | -2.333756 | -2.013500 |
| C          | 2.127084  | 2.405377  | -1.347964 | H                                        | 2.910836  | -2.719120 | 1.874296  |
| C          | 4.535311  | -0.907644 | 0.479737  | H                                        | 4.371724  | -3.663443 | 1.527019  |
| C          | 5.430910  | -0.231199 | -0.565562 | H                                        | 2.863667  | -4.005692 | 0.666193  |
| C          | 5.291348  | -1.040456 | 1.799323  | <b>Formation of 5a</b>                   |           |           |           |
| C          | 3.848674  | -2.229428 | -0.037968 | === Ph <sub>2</sub> SiH <sub>2</sub> === |           |           |           |
| C          | 4.606526  | -2.965601 | -1.139798 | C                                        | -3.690043 | 1.168288  | 0.524498  |

|            |           |           |           |    |           |           |           |
|------------|-----------|-----------|-----------|----|-----------|-----------|-----------|
| C          | -4.920998 | 0.674614  | 0.983991  | C  | -0.421023 | -5.800255 | -2.724120 |
| C          | -4.983554 | -0.424549 | 1.840609  | C  | -1.789767 | -5.926475 | -2.493007 |
| C          | -3.810912 | -1.051736 | 2.255287  | C  | -2.458547 | -4.931986 | -1.780111 |
| C          | -2.576908 | -0.575941 | 1.811610  | C  | -1.761005 | -3.819974 | -1.308000 |
| C          | -2.519496 | 0.522486  | 0.957140  | C  | -3.594156 | 1.101418  | 0.463309  |
| C          | -2.422472 | 3.967176  | -0.068181 | C  | -4.826616 | 0.868685  | 1.094720  |
| C          | -2.378619 | 4.369349  | 1.277065  | C  | -4.975937 | -0.154259 | 2.031173  |
| C          | -1.517113 | 5.379746  | 1.698821  | C  | -3.890980 | -0.967762 | 2.350979  |
| C          | -0.676550 | 6.008921  | 0.780789  | C  | -2.658641 | -0.756753 | 1.731979  |
| C          | -0.701125 | 5.622172  | -0.557492 | C  | -2.513427 | 0.267721  | 0.798809  |
| C          | -1.565289 | 4.610144  | -0.974952 | C  | -2.351869 | 3.916538  | -0.115916 |
| Si         | -3.620658 | 2.635397  | -0.656428 | C  | -2.308014 | 4.214899  | 1.255211  |
| H          | -3.177581 | 2.211390  | -2.013345 | C  | -1.566838 | 5.294221  | 1.734129  |
| H          | -5.844069 | 1.153182  | 0.672089  | C  | -0.850863 | 6.097618  | 0.847899  |
| H          | -5.945746 | -0.788287 | 2.184494  | C  | -0.876033 | 5.814542  | -0.516917 |
| H          | -3.856675 | -1.906060 | 2.921710  | C  | -1.617802 | 4.733523  | -0.990752 |
| H          | -1.661019 | -1.059935 | 2.132951  | N  | 1.610415  | -1.630978 | 2.359758  |
| H          | -1.549206 | 0.882269  | 0.628320  | N  | 0.778636  | -2.339127 | 0.413084  |
| H          | -3.019507 | 3.885421  | 2.007716  | N  | 0.690819  | -0.839537 | -3.093963 |
| H          | -1.499018 | 5.674643  | 2.742425  | N  | 1.562786  | -0.150311 | -1.159752 |
| H          | -0.004315 | 6.794391  | 1.108249  | Si | -3.404337 | 2.498014  | -0.784079 |
| H          | -0.046520 | 6.104881  | -1.275031 | H  | -2.767046 | 2.011728  | -2.038065 |
| H          | -1.568314 | 4.317866  | -2.020523 | H  | 4.655011  | 0.073402  | 0.927600  |
| H          | -5.004214 | 3.174820  | -0.768428 | H  | 5.955985  | 1.996780  | 1.746959  |
|            |           |           |           | H  | 4.861125  | 4.203935  | 2.061723  |
|            |           |           |           | H  | 2.442865  | 4.457173  | 1.538786  |
| === RC === |           |           |           | H  | 1.142608  | 2.539355  | 0.730721  |
| B          | 1.951705  | -0.097201 | 0.242190  | H  | 2.067821  | -1.283857 | 4.352810  |
| B          | 0.406606  | -2.400300 | -0.990627 | H  | 1.860445  | 0.187525  | 3.379064  |
| C          | 2.786403  | 1.138413  | 0.771823  | H  | 3.337888  | -0.773680 | 3.217832  |
| C          | 4.157233  | 1.028450  | 1.067588  | H  | 0.998342  | -3.307524 | 3.547531  |
| C          | 4.899759  | 2.116190  | 1.528410  | H  | -0.026947 | -4.202933 | 1.173117  |
| C          | 4.287405  | 3.356170  | 1.702904  | H  | 0.526145  | -2.553779 | -4.313121 |
| C          | 2.931741  | 3.497568  | 1.408297  | H  | -0.064083 | -1.030958 | -5.015990 |
| C          | 2.197720  | 2.404428  | 0.948618  | H  | -1.012102 | -1.867573 | -3.768439 |
| C          | 1.489048  | -1.289992 | 1.013262  | H  | 1.298835  | 0.836910  | -4.284086 |
| C          | 2.258478  | -0.828923 | 3.380492  | H  | 2.381978  | 1.704422  | -1.925310 |
| C          | 1.014754  | -2.849138 | 2.572182  | H  | 1.335934  | -4.607466 | -2.432113 |
| C          | 0.504337  | -3.296055 | 1.399133  | H  | 0.110218  | -6.571321 | -3.272561 |
| C          | 0.850360  | -1.197189 | -1.757806 | H  | -2.329577 | -6.791577 | -2.862730 |
| C          | -0.002271 | -1.620829 | -4.101296 | H  | -3.524080 | -5.020191 | -1.594878 |
| C          | 1.297982  | 0.372083  | -3.311777 | H  | -2.301477 | -3.054090 | -0.759806 |
| C          | 1.835654  | 0.805502  | -2.146255 | H  | -5.683170 | 1.489969  | 0.851807  |
| C          | -0.381222 | -3.661938 | -1.533601 | H  | -5.937221 | -0.316306 | 2.506825  |
| C          | 0.268404  | -4.684450 | -2.247870 |    |           |           |           |

|                      |           |           |           |                   |           |           |           |
|----------------------|-----------|-----------|-----------|-------------------|-----------|-----------|-----------|
| H                    | -4.004770 | -1.766035 | 3.076476  | C                 | -2.411135 | 2.647481  | -1.833913 |
| H                    | -1.812580 | -1.391504 | 1.971256  | N                 | 1.563491  | -1.872661 | 2.102042  |
| H                    | -1.544843 | 0.410366  | 0.328914  | N                 | 0.426414  | -1.973670 | 0.220196  |
| H                    | -2.852190 | 3.594485  | 1.960321  | N                 | 0.642296  | 0.068713  | -3.033791 |
| H                    | -1.545803 | 5.506112  | 2.797716  | N                 | 1.553044  | 0.312807  | -1.038099 |
| H                    | -0.273928 | 6.937770  | 1.218903  | Si                | -1.602624 | 0.482813  | -0.107281 |
| H                    | -0.315290 | 6.431885  | -1.210449 | H                 | -0.045879 | 0.512363  | 0.533978  |
| H                    | -1.619614 | 4.523827  | -2.056259 | H                 | 4.331709  | 0.699602  | 0.133534  |
| H                    | -4.770777 | 2.989788  | -1.116202 | H                 | 5.838707  | 2.190987  | 1.373629  |
|                      |           |           |           | H                 | 4.963787  | 3.602306  | 3.222534  |
|                      |           |           |           | H                 | 2.549120  | 3.502265  | 3.798856  |
| <b>=== TS-5a ===</b> |           |           |           | H                 | 1.037459  | 2.021351  | 2.551374  |
| B                    | 1.606689  | 0.227883  | 0.449497  | H                 | 2.664513  | -2.272030 | 3.817985  |
| B                    | -0.175973 | -1.538135 | -1.078360 | H                 | 1.918151  | -0.658156 | 3.794317  |
| C                    | 2.552370  | 1.231951  | 1.237041  | H                 | 3.339451  | -0.990693 | 2.790988  |
| C                    | 3.924238  | 1.314407  | 0.930993  | H                 | 0.962355  | -3.778163 | 2.901916  |
| C                    | 4.786026  | 2.155232  | 1.634346  | H                 | -0.459450 | -3.917373 | 0.550475  |
| C                    | 4.297324  | 2.946094  | 2.673642  | H                 | 0.297490  | -1.243210 | -4.660269 |
| C                    | 2.943173  | 2.887249  | 2.996607  | H                 | -0.278067 | 0.428932  | -4.859856 |
| C                    | 2.089106  | 2.043336  | 2.285964  | H                 | -1.152020 | -0.692506 | -3.802800 |
| C                    | 1.282046  | -1.192261 | 0.945022  | H                 | 1.650421  | 1.705152  | -4.003232 |
| C                    | 2.419678  | -1.416372 | 3.188834  | H                 | 2.758604  | 2.045267  | -1.518913 |
| C                    | 0.880393  | -3.072576 | 2.092609  | H                 | 0.622375  | -3.293762 | -3.053500 |
| C                    | 0.180764  | -3.143103 | 0.932948  | H                 | -0.598638 | -5.106491 | -4.178198 |
| C                    | 0.657027  | -0.448990 | -1.757022 | H                 | -2.977271 | -5.551712 | -3.610670 |
| C                    | -0.166138 | -0.393423 | -4.152960 | H                 | -4.105389 | -4.156060 | -1.893148 |
| C                    | 1.511724  | 1.141845  | -3.096083 | H                 | -2.891718 | -2.335172 | -0.780690 |
| C                    | 2.066362  | 1.303358  | -1.872884 | H                 | -4.447844 | -0.043660 | 0.634767  |
| C                    | -1.035258 | -2.644197 | -1.833219 | H                 | -5.687711 | -0.230730 | 2.755863  |
| C                    | -0.420540 | -3.462278 | -2.800747 | H                 | -4.500924 | 0.022148  | 4.922594  |
| C                    | -1.105626 | -4.496022 | -3.438030 | H                 | -2.057069 | 0.457928  | 4.940234  |
| C                    | -2.438644 | -4.749412 | -3.118055 | H                 | -0.816290 | 0.634710  | 2.819649  |
| C                    | -3.069753 | -3.965159 | -2.154537 | H                 | -0.118376 | 3.038065  | 0.631018  |
| C                    | -2.375633 | -2.932217 | -1.523227 | H                 | -0.162944 | 5.341274  | -0.217477 |
| C                    | -2.531639 | 0.320593  | 1.554023  | H                 | -1.633384 | 5.944848  | -2.126416 |
| C                    | -3.914085 | 0.067550  | 1.573766  | H                 | -3.076278 | 4.207434  | -3.160611 |
| C                    | -4.619826 | -0.038523 | 2.771499  | H                 | -3.055117 | 1.901827  | -2.290072 |
| C                    | -3.954831 | 0.103383  | 3.988879  | H                 | -2.632477 | -0.090538 | -1.044226 |
| C                    | -2.582621 | 0.348365  | 3.996941  |                   |           |           |           |
| C                    | -1.885553 | 0.451249  | 2.793255  |                   |           |           |           |
| C                    | -1.586659 | 2.279240  | -0.757737 | <b>=== 5a ===</b> |           |           |           |
| C                    | -0.778615 | 3.280123  | -0.194828 | B                 | 1.680262  | 0.427147  | 1.519154  |
| C                    | -0.795440 | 4.588107  | -0.676065 | B                 | -0.572632 | -0.601185 | -0.597733 |
| C                    | -1.619895 | 4.928145  | -1.748289 | C                 | 3.270615  | 0.094093  | 1.578370  |
| C                    | -2.428374 | 3.952064  | -2.328160 | C                 | 3.850862  | -0.934549 | 0.815260  |

|    |           |           |           |               |           |           |           |
|----|-----------|-----------|-----------|---------------|-----------|-----------|-----------|
| C  | 5.218448  | -1.203110 | 0.857623  | H             | -0.267172 | -3.613053 | 3.087357  |
| C  | 6.055079  | -0.440888 | 1.673748  | H             | -1.403910 | -3.070148 | 0.631428  |
| C  | 5.508808  | 0.584264  | 2.443221  | H             | 0.406717  | 1.580992  | -3.922201 |
| C  | 4.136780  | 0.840164  | 2.392961  | H             | -1.034046 | 2.248897  | -3.104689 |
| C  | 0.767178  | -0.887520 | 1.637703  | H             | -0.767764 | 0.496124  | -3.165681 |
| C  | 1.608880  | -1.666576 | 3.862272  | H             | 1.650494  | 3.274417  | -2.285884 |
| C  | -0.112109 | -2.796756 | 2.403066  | H             | 2.714884  | 2.724576  | 0.206429  |
| C  | -0.669430 | -2.523544 | 1.196003  | H             | 1.676324  | -1.345050 | -2.074860 |
| C  | 0.411128  | 0.665743  | -0.774486 | H             | 1.973618  | -2.983561 | -3.873729 |
| C  | -0.280071 | 1.461584  | -3.082421 | H             | 0.030078  | -4.281842 | -4.723237 |
| C  | 1.428880  | 2.494462  | -1.577702 | H             | -2.213742 | -3.909605 | -3.722495 |
| C  | 1.942976  | 2.224280  | -0.351926 | H             | -2.512440 | -2.276582 | -1.922028 |
| C  | -0.447749 | -1.655326 | -1.840241 | H             | -4.484333 | -0.313398 | 2.013868  |
| C  | 0.809792  | -1.898016 | -2.426530 | H             | -4.813853 | 0.695115  | 4.232696  |
| C  | 0.987068  | -2.827590 | -3.449142 | H             | -3.251449 | 2.441680  | 5.057009  |
| C  | -0.101277 | -3.558224 | -3.926083 | H             | -1.345621 | 3.153810  | 3.631829  |
| C  | -1.357431 | -3.347032 | -3.364702 | H             | -1.002177 | 2.145420  | 1.427952  |
| C  | -1.520891 | -2.410953 | -2.340690 | H             | -2.945023 | 3.051602  | -0.358692 |
| C  | -2.723596 | 0.836915  | 1.527588  | H             | -3.882489 | 4.557516  | -2.059420 |
| C  | -3.789607 | 0.446814  | 2.357108  | H             | -4.821537 | 3.638057  | -4.167280 |
| C  | -3.981096 | 1.015827  | 3.615450  | H             | -4.816921 | 1.182129  | -4.542678 |
| C  | -3.104961 | 1.996030  | 4.078957  | H             | -3.866060 | -0.326855 | -2.855878 |
| C  | -2.037676 | 2.397107  | 3.277727  | H             | -3.458567 | -1.125000 | -0.157516 |
| C  | -1.851109 | 1.821760  | 2.020819  |               |           |           |           |
| C  | -3.306370 | 1.237652  | -1.473590 | ==== 5a* ==== |           |           |           |
| C  | -3.334201 | 2.628471  | -1.279049 | B             | 1.716160  | 0.233601  | 1.610786  |
| C  | -3.870147 | 3.487487  | -2.239270 | B             | -0.471763 | -0.634803 | -0.647250 |
| C  | -4.399897 | 2.972881  | -3.421557 | C             | 1.465393  | 1.154154  | 2.925019  |
| C  | -4.395496 | 1.594084  | -3.631637 | C             | 2.537899  | 1.558561  | 3.735923  |
| C  | -3.855737 | 0.742447  | -2.668895 | C             | 2.350566  | 2.352471  | 4.869557  |
| N  | 0.774997  | -1.769852 | 2.669152  | C             | 1.068774  | 2.765916  | 5.226148  |
| N  | -0.121645 | -1.338665 | 0.733653  | C             | -0.016916 | 2.381056  | 4.438620  |
| N  | 0.481945  | 1.519884  | -1.835572 | C             | 0.184481  | 1.588898  | 3.309103  |
| N  | 1.313009  | 1.095408  | 0.131961  | C             | 0.847631  | -1.113446 | 1.572472  |
| Si | -2.532128 | 0.052767  | -0.194249 | C             | 1.801618  | -2.152540 | 3.636843  |
| H  | 1.388565  | 1.205713  | 2.404810  | C             | 0.102721  | -3.164913 | 2.064388  |
| H  | 3.220533  | -1.545261 | 0.173738  | C             | -0.503476 | -2.753741 | 0.922215  |
| H  | 5.633014  | -2.006037 | 0.256368  | C             | 0.529991  | 0.635755  | -0.703479 |
| H  | 7.119598  | -0.646162 | 1.709931  | C             | -0.050741 | 1.598157  | -2.980187 |
| H  | 6.149454  | 1.182450  | 3.083409  | C             | 1.575708  | 2.520391  | -1.325319 |
| H  | 3.725185  | 1.637771  | 3.005209  | C             | 2.022061  | 2.171774  | -0.093302 |
| H  | 1.148303  | -2.245972 | 4.662237  | C             | -0.357825 | -1.598327 | -1.954982 |
| H  | 1.674920  | -0.623659 | 4.167475  | C             | 0.889263  | -1.811670 | -2.573127 |
| H  | 2.614578  | -2.042370 | 3.666656  | C             | 1.042866  | -2.674616 | -3.656583 |





|   |           |           |           |               |           |           |           |
|---|-----------|-----------|-----------|---------------|-----------|-----------|-----------|
| N | -1.241040 | -2.296444 | 1.489591  | H             | 0.467325  | 4.683712  | 0.473786  |
| B | -0.553352 | -2.671014 | 0.262487  | H             | 0.596292  | 2.214229  | 0.245161  |
| C | -0.769063 | -1.688820 | -0.843841 | H             | 3.065655  | 1.742638  | -1.652865 |
| N | -1.565359 | -0.546767 | -0.683195 | H             | 4.337783  | 1.216075  | -3.722793 |
| B | -2.251531 | -0.171806 | 0.544689  | H             | 5.721858  | -2.434109 | -1.969638 |
| C | -2.036325 | -1.155180 | 1.650860  | H             | 4.469806  | -1.910854 | 0.118949  |
| P | 2.731339  | 0.223858  | 0.968691  | H             | -1.809643 | 2.221940  | 1.934957  |
| C | 2.597344  | 2.064630  | 1.041358  | H             | -3.148661 | 4.285986  | 1.976597  |
| C | 3.660854  | -0.055250 | -0.619256 | H             | -5.232066 | 4.453532  | 0.634310  |
| C | 3.669186  | 2.799975  | 1.569170  | H             | -5.954660 | 2.520947  | -0.750292 |
| C | 3.606648  | 4.185677  | 1.684386  | H             | -4.624613 | 0.453135  | -0.783561 |
| C | 2.445886  | 4.830085  | 1.283132  | H             | 1.835698  | -3.298178 | 1.565488  |
| C | 1.357312  | 4.143402  | 0.772264  | H             | 3.147824  | -5.378619 | 1.536156  |
| C | 1.443182  | 2.756579  | 0.649775  | H             | 2.389469  | -7.318873 | 0.181935  |
| C | 3.637459  | 0.823890  | -1.709982 | H             | 0.285199  | -7.150319 | -1.126652 |
| C | 4.345689  | 0.541494  | -2.875192 | H             | -1.037255 | -5.074578 | -1.086478 |
| C | 5.076506  | -0.635951 | -2.938192 | H             | 0.992497  | -2.171000 | -3.698153 |
| C | 5.131823  | -1.530127 | -1.882722 | H             | 1.515307  | -2.738350 | -2.100104 |
| C | 4.424135  | -1.225068 | -0.720122 | H             | 0.166382  | -3.540305 | -2.921465 |
| C | -3.106578 | 1.157663  | 0.579617  |               |           |           |           |
| C | -2.721069 | 2.272265  | 1.346924  | === TS-6* === |           |           |           |
| C | -3.475078 | 3.446265  | 1.371635  | N             | -2.009497 | -0.636289 | 2.643358  |
| C | -4.643059 | 3.543033  | 0.617574  | C             | -1.543493 | -1.601424 | 3.520681  |
| C | -5.045995 | 2.457750  | -0.160560 | C             | -0.751905 | -2.448842 | 2.824005  |
| C | -4.286827 | 1.288531  | -0.177204 | N             | -0.097014 | -2.431946 | -2.255176 |
| C | 0.295283  | -4.004300 | 0.228153  | C             | -0.722753 | -1.589532 | -3.145621 |
| C | 1.484938  | -4.135869 | 0.969493  | C             | -1.374509 | -0.635896 | -2.427336 |
| C | 2.233359  | -5.312258 | 0.955574  | C             | -2.834207 | 0.500067  | 3.038844  |
| C | 1.809613  | -6.402417 | 0.195677  | N             | -0.726207 | -2.005639 | 1.499249  |
| C | 0.630352  | -6.304824 | -0.540556 | B             | 0.046551  | -2.562379 | 0.379647  |
| C | -0.113046 | -5.124293 | -0.518548 | C             | -0.366015 | -2.001688 | -0.974565 |
| F | 2.374127  | 6.179022  | 1.400410  | N             | -1.167440 | -0.895410 | -1.087515 |
| F | 5.765028  | -0.916410 | -4.072530 | B             | -1.421824 | 0.005953  | 0.113472  |
| C | 0.650818  | -2.576563 | -2.745886 | C             | -1.499914 | -0.869312 | 1.398043  |
| H | -2.337027 | -2.603071 | 4.573015  | P             | 1.858320  | 0.155726  | 0.380572  |
| H | -0.741192 | -3.946145 | 2.804005  | C             | 1.800194  | 1.623848  | 1.490389  |
| H | -0.476992 | -0.251243 | -3.771822 | C             | 2.021359  | 0.852500  | -1.317795 |
| H | -2.073513 | 1.095231  | -2.006515 | C             | 1.306968  | 1.427360  | 2.794990  |
| H | -3.813856 | -0.686353 | 4.495513  | C             | 1.312715  | 2.446583  | 3.743848  |
| H | -2.957851 | 0.684323  | 3.755922  | C             | 1.821132  | 3.684666  | 3.384319  |
| H | -4.305683 | -0.080829 | 2.900040  | C             | 2.327700  | 3.925982  | 2.117966  |
| H | 1.423373  | -0.010710 | 0.465872  | C             | 2.316505  | 2.894460  | 1.180313  |
| H | 4.566019  | 2.286259  | 1.899106  | C             | 1.287241  | 1.941300  | -1.821515 |
| H | 4.431198  | 4.761127  | 2.086772  | C             | 1.406754  | 2.350752  | -3.146712 |

|   |           |           |           |              |           |           |           |
|---|-----------|-----------|-----------|--------------|-----------|-----------|-----------|
| C | 2.261582  | 1.650337  | -3.984217 | H            | 0.707089  | -3.667490 | -3.715674 |
| C | 3.007506  | 0.571463  | -3.539285 | H            | 1.682175  | -3.558782 | -2.235823 |
| C | 2.883551  | 0.185682  | -2.205790 | H            | 0.193840  | -4.519968 | -2.242797 |
| C | -2.392965 | 1.253920  | -0.112337 |              |           |           |           |
| C | -2.015696 | 2.554347  | 0.263195  | ==== 6* ==== |           |           |           |
| C | -2.873011 | 3.643963  | 0.103962  | N            | -1.515326 | 0.008774  | 2.991500  |
| C | -4.140177 | 3.462911  | -0.447352 | C            | -0.874854 | -0.995052 | 3.697478  |
| C | -4.540557 | 2.184247  | -0.834792 | C            | -0.055986 | -1.627619 | 2.818841  |
| C | -3.677606 | 1.101356  | -0.666463 | N            | -0.030331 | -0.997018 | -2.259279 |
| C | 0.984725  | -3.803699 | 0.633507  | C            | -0.870366 | -0.174948 | -2.987462 |
| C | 2.384509  | -3.685200 | 0.598787  | C            | -1.508278 | 0.623593  | -2.093419 |
| C | 3.210406  | -4.788893 | 0.813362  | C            | -2.474694 | 0.949625  | 3.565606  |
| C | 2.656181  | -6.041973 | 1.068972  | N            | -0.200281 | -1.007628 | 1.589236  |
| C | 1.269754  | -6.183079 | 1.115808  | B            | 0.644011  | -1.342573 | 0.306044  |
| C | 0.448518  | -5.076109 | 0.903501  | C            | -0.150615 | -0.700675 | -0.933724 |
| F | 1.826208  | 4.689302  | 4.303948  | N            | -1.062047 | 0.287959  | -0.832330 |
| F | 2.375503  | 2.038951  | -5.282858 | B            | -1.616689 | 0.940011  | 0.505152  |
| C | 0.667030  | -3.615143 | -2.628323 | C            | -1.102606 | -0.011204 | 1.699611  |
| H | -1.831917 | -1.609458 | 4.558199  | P            | 2.509662  | -0.449936 | 0.618226  |
| H | -0.215775 | -3.325227 | 3.140471  | C            | 2.205498  | 1.261544  | 1.269024  |
| H | -0.650154 | -1.732135 | -4.210407 | C            | 3.246806  | -0.167454 | -1.064677 |
| H | -1.950017 | 0.208234  | -2.762491 | C            | 1.792168  | 1.358744  | 2.610167  |
| H | -3.323491 | 0.259672  | 3.982650  | C            | 1.611330  | 2.587351  | 3.237939  |
| H | -2.222854 | 1.396865  | 3.164606  | C            | 1.873641  | 3.742975  | 2.520513  |
| H | -3.589389 | 0.694507  | 2.280636  | C            | 2.320331  | 3.701423  | 1.212360  |
| H | -0.095241 | 0.347182  | 0.334683  | C            | 2.483123  | 2.460749  | 0.596094  |
| H | 0.922749  | 0.452975  | 3.081061  | C            | 2.689166  | 0.624245  | -2.083079 |
| H | 0.937436  | 2.289609  | 4.748278  | C            | 3.318120  | 0.775693  | -3.317257 |
| H | 2.727721  | 4.903400  | 1.875380  | C            | 4.516071  | 0.113016  | -3.536792 |
| H | 2.726349  | 3.085107  | 0.196083  | C            | 5.106142  | -0.681404 | -2.568874 |
| H | 0.597214  | 2.470415  | -1.176474 | C            | 4.466770  | -0.806906 | -1.335794 |
| H | 0.839084  | 3.188272  | -3.534526 | C            | -3.236412 | 1.034741  | 0.427608  |
| H | 3.677272  | 0.060178  | -4.220374 | C            | -3.890315 | 2.276073  | 0.392787  |
| H | 3.476818  | -0.646723 | -1.842143 | C            | -5.281426 | 2.376030  | 0.316635  |
| H | -1.034390 | 2.715978  | 0.697929  | C            | -6.062475 | 1.223024  | 0.273844  |
| H | -2.549884 | 4.634155  | 0.408015  | C            | -5.440478 | -0.025980 | 0.304339  |
| H | -4.808382 | 4.307654  | -0.574672 | C            | -4.050932 | -0.110569 | 0.379038  |
| H | -5.526061 | 2.030443  | -1.262387 | C            | 0.801168  | -2.959340 | 0.190923  |
| H | -4.017039 | 0.112941  | -0.964142 | C            | 2.002281  | -3.662741 | 0.361499  |
| H | 2.829102  | -2.711413 | 0.421846  | C            | 2.063013  | -5.055339 | 0.264527  |
| H | 4.288230  | -4.667917 | 0.786116  | C            | 0.910992  | -5.791023 | 0.001311  |
| H | 3.297946  | -6.900476 | 1.234161  | C            | -0.302328 | -5.120829 | -0.160373 |
| H | 0.828505  | -7.153715 | 1.316198  | C            | -0.348060 | -3.731774 | -0.066712 |
| H | -0.629332 | -5.208571 | 0.940027  | F            | 1.705833  | 4.948575  | 3.126773  |

|           |           |           |           |   |           |           |           |
|-----------|-----------|-----------|-----------|---|-----------|-----------|-----------|
| F         | 5.129298  | 0.251112  | -4.739450 | B | -1.283677 | 0.619129  | 0.334305  |
| C         | 0.778130  | -2.053178 | -2.867860 | C | -0.482897 | -0.199649 | 1.458002  |
| H         | -1.058380 | -1.165221 | 4.744419  | P | 3.337746  | -0.682210 | 0.018226  |
| H         | 0.608477  | -2.461854 | 2.959795  | C | 3.282459  | 1.049093  | 0.683576  |
| H         | -0.937546 | -0.235102 | -4.060146 | C | 4.190210  | -1.607704 | 1.385309  |
| H         | -2.251928 | 1.385917  | -2.247133 | C | 3.629559  | 2.095738  | -0.182989 |
| H         | -2.388337 | 0.909911  | 4.651000  | C | 3.621117  | 3.426790  | 0.235075  |
| H         | -2.245610 | 1.958390  | 3.225291  | C | 3.278308  | 3.700256  | 1.547548  |
| H         | -3.491899 | 0.695950  | 3.266696  | C | 2.935932  | 2.700439  | 2.445363  |
| H         | -1.134841 | 2.044261  | 0.635300  | C | 2.931340  | 1.380095  | 2.002471  |
| H         | 1.626550  | 0.457185  | 3.188363  | C | 4.006058  | -2.988106 | 1.577571  |
| H         | 1.294492  | 2.653695  | 4.271927  | C | 4.760420  | -3.706273 | 2.504836  |
| H         | 2.537115  | 4.623391  | 0.686406  | C | 5.719241  | -3.037145 | 3.245460  |
| H         | 2.846779  | 2.446178  | -0.421786 | C | 5.950855  | -1.681769 | 3.080871  |
| H         | 1.749169  | 1.136334  | -1.920891 | C | 5.190055  | -0.979735 | 2.148904  |
| H         | 2.893651  | 1.394098  | -4.099135 | C | -1.611301 | 2.163012  | 0.700949  |
| H         | 6.046901  | -1.176864 | -2.775379 | C | -2.929738 | 2.645299  | 0.685031  |
| H         | 4.929639  | -1.410028 | -0.562852 | C | -3.234294 | 3.973275  | 0.991565  |
| H         | -3.295392 | 3.184146  | 0.428651  | C | -2.214469 | 4.862825  | 1.323971  |
| H         | -5.754347 | 3.352528  | 0.290883  | C | -0.893529 | 4.413426  | 1.342113  |
| H         | -7.143255 | 1.294750  | 0.216523  | C | -0.603782 | 3.084680  | 1.033750  |
| H         | -6.039346 | -0.930505 | 0.269847  | C | 1.165590  | -2.781716 | -0.571076 |
| H         | -3.589732 | -1.095023 | 0.399635  | C | 2.129191  | -3.507635 | -1.291518 |
| H         | 2.910998  | -3.114490 | 0.585507  | C | 1.899427  | -4.811897 | -1.732152 |
| H         | 3.012048  | -5.563771 | 0.400305  | C | 0.682773  | -5.436340 | -1.467453 |
| H         | 0.954135  | -6.872276 | -0.072158 | C | -0.296059 | -4.740532 | -0.759693 |
| H         | -1.210357 | -5.681194 | -0.358356 | C | -0.054060 | -3.438770 | -0.323961 |
| H         | -1.306094 | -3.234563 | -0.195337 | F | 3.277893  | 4.989789  | 1.972705  |
| H         | 1.060078  | -1.736170 | -3.871624 | F | 6.455661  | -3.728291 | 4.154834  |
| H         | 1.678908  | -2.217588 | -2.285535 | C | 2.059089  | -0.777184 | -3.258517 |
| H         | 0.212791  | -2.985225 | -2.918693 | H | -0.097645 | -1.461080 | 4.434924  |
|           |           |           |           | H | 1.723590  | -2.306840 | 2.552739  |
| === 6 === |           |           |           | H | 0.205604  | 1.060592  | -4.144443 |
| N         | -0.848540 | -0.326128 | 2.758381  | H | -1.599249 | 1.837990  | -2.196663 |
| C         | 0.006125  | -1.210024 | 3.393314  | H | -2.138957 | -0.103693 | 4.374345  |
| C         | 0.899828  | -1.623439 | 2.461103  | H | -1.802389 | 1.406777  | 3.489676  |
| N         | 1.012652  | -0.083605 | -2.507372 | H | -2.882421 | 0.190044  | 2.787161  |
| C         | 0.121412  | 0.786781  | -3.106937 | H | -2.324172 | 0.017744  | 0.132340  |
| C         | -0.762999 | 1.162545  | -2.150447 | H | 3.926994  | 1.867287  | -1.200422 |
| C         | -1.986628 | 0.337209  | 3.389858  | H | 3.887968  | 4.235553  | -0.434074 |
| N         | 0.594563  | -0.988857 | 1.266457  | H | 2.670576  | 2.959162  | 3.463317  |
| B         | 1.356501  | -1.229534 | -0.093709 | H | 2.662909  | 0.597758  | 2.702072  |
| C         | 0.672307  | -0.244240 | -1.194866 | H | 3.267553  | -3.524738 | 0.996550  |
| N         | -0.415143 | 0.521147  | -0.980870 | H | 4.608964  | -4.769174 | 2.649804  |

|                                    |           |           |           |   |           |           |           |
|------------------------------------|-----------|-----------|-----------|---|-----------|-----------|-----------|
| H                                  | 6.716371  | -1.189326 | 3.668394  | C | -2.393804 | 0.836974  | -1.262827 |
| H                                  | 5.386881  | 0.076935  | 2.017940  | C | -4.319307 | 0.048274  | -2.701144 |
| H                                  | -3.735948 | 1.964193  | 0.427128  | C | -2.243427 | 1.218941  | -3.479070 |
| H                                  | -4.264904 | 4.312915  | 0.968735  | C | -1.101927 | 1.688338  | -2.919494 |
| H                                  | -2.444317 | 5.895491  | 1.563642  | C | -0.543771 | 1.366403  | 0.832879  |
| H                                  | -0.090671 | 5.098089  | 1.595860  | C | 1.408954  | 2.099766  | 2.264685  |
| H                                  | 0.431455  | 2.759474  | 1.051801  | C | -0.696860 | 0.989513  | 3.049937  |
| H                                  | 3.091700  | -3.054219 | -1.506465 | C | -1.839687 | 0.523399  | 2.490827  |
| H                                  | 2.674622  | -5.340717 | -2.277181 | C | 1.187805  | 2.482083  | -1.011580 |
| H                                  | 0.500334  | -6.450511 | -1.805539 | C | 1.219256  | 3.854096  | -1.322617 |
| H                                  | -1.249947 | -5.211648 | -0.546095 | C | 2.391445  | 4.486842  | -1.736031 |
| H                                  | -0.837991 | -2.923600 | 0.221819  | C | 3.574171  | 3.757622  | -1.854998 |
| H                                  | 2.302051  | -0.177937 | -4.136052 | C | 3.570405  | 2.394779  | -1.563153 |
| H                                  | 2.948727  | -0.883085 | -2.641558 | C | 2.392528  | 1.770006  | -1.151174 |
| H                                  | 1.711368  | -1.762078 | -3.573949 | N | -3.038845 | 0.697829  | -2.489701 |
|                                    |           |           |           | N | -1.169447 | 1.459964  | -1.538701 |
|                                    |           |           |           | N | 0.099762  | 1.508254  | 2.060271  |
| <b>Formation of 8 and 8*</b>       |           |           |           | N | -1.769631 | 0.746181  | 1.109399  |
| <b>=== PhHC=CH<sub>2</sub> ===</b> |           |           |           | H | -3.305980 | -2.224914 | 0.830760  |
| C                                  | 1.150351  | -1.421605 | -0.046717 | H | -5.402874 | -3.276228 | 1.569737  |
| C                                  | 0.229686  | -2.390143 | -0.065610 | H | -7.480892 | -1.927927 | 1.760134  |
| H                                  | 1.506317  | -1.013274 | 0.891375  | H | -7.424215 | 0.493875  | 1.211741  |
| H                                  | 1.582133  | -1.001607 | -0.948330 | H | -5.323817 | 1.550348  | 0.480143  |
| H                                  | -0.146740 | -2.752858 | 0.888492  | H | -4.303217 | -0.971070 | -2.309376 |
| C                                  | -0.357358 | -3.049944 | -1.242592 | H | -4.518266 | 0.014141  | -3.772407 |
| C                                  | -1.303983 | -4.067120 | -1.047437 | H | -5.125558 | 0.593752  | -2.205635 |
| C                                  | -0.017441 | -2.712079 | -2.563267 | H | -2.550534 | 1.213489  | -4.512137 |
| C                                  | -1.890379 | -4.725540 | -2.125305 | H | -0.249790 | 2.162186  | -3.372297 |
| H                                  | -1.580935 | -4.342700 | -0.034931 | H | 2.194218  | 1.489922  | 1.810979  |
| C                                  | -0.601332 | -3.367484 | -3.639981 | H | 1.591988  | 2.175631  | 3.336706  |
| H                                  | 0.708467  | -1.929710 | -2.750817 | H | 1.452586  | 3.097674  | 1.824583  |
| C                                  | -1.541047 | -4.378305 | -3.427636 | H | -0.390286 | 0.995820  | 4.083121  |
| H                                  | -2.619045 | -5.508377 | -1.947004 | H | -2.698361 | 0.063500  | 2.945564  |
| H                                  | -0.324150 | -3.090156 | -4.651004 | H | 0.309505  | 4.440485  | -1.231786 |
| H                                  | -1.994633 | -4.887437 | -4.270304 | H | 2.383015  | 5.548035  | -1.962490 |
| <b>=== RC ===</b>                  |           |           |           | H | 4.488181  | 4.246255  | -2.174821 |
| B                                  | -2.789078 | 0.431973  | 0.119740  | H | 4.483304  | 1.816364  | -1.660307 |
| B                                  | -0.151035 | 1.775643  | -0.549461 | H | 2.408488  | 0.705072  | -0.939888 |
| C                                  | -4.140165 | -0.249431 | 0.584111  | C | -0.050161 | -3.153285 | 1.731549  |
| C                                  | -4.201615 | -1.616324 | 0.912287  | C | 0.472613  | -3.935726 | 0.781697  |
| C                                  | -5.388541 | -2.218007 | 1.330363  | H | -0.381043 | -2.137862 | 1.545296  |
| C                                  | -6.555963 | -1.462857 | 1.436608  | H | -0.159975 | -3.516087 | 2.746675  |
| C                                  | -6.523066 | -0.104540 | 1.126037  | H | 0.786555  | -4.938999 | 1.063022  |
| C                                  | -5.330881 | 0.488677  | 0.708906  | C | 0.691900  | -3.604432 | -0.635542 |

|              |           |           |           |               |           |           |           |
|--------------|-----------|-----------|-----------|---------------|-----------|-----------|-----------|
| C            | 1.334800  | -4.543151 | -1.457465 | H             | -3.470262 | -1.478456 | -3.879778 |
| C            | 0.287744  | -2.388343 | -1.212636 | H             | -4.468542 | -0.667921 | -2.649260 |
| C            | 1.573792  | -4.280702 | -2.804225 | H             | -1.884913 | 0.253330  | -4.561706 |
| H            | 1.651321  | -5.489536 | -1.030282 | H             | 0.179631  | 1.563280  | -3.313783 |
| C            | 0.524404  | -2.125363 | -2.556947 | H             | 2.155372  | 1.729965  | 2.199718  |
| H            | -0.219699 | -1.641530 | -0.613037 | H             | 1.206356  | 2.579729  | 3.438380  |
| C            | 1.169907  | -3.068818 | -3.359531 | H             | 1.201521  | 3.153469  | 1.757003  |
| H            | 2.074206  | -5.021919 | -3.417620 | H             | -0.660729 | 1.221832  | 4.160144  |
| H            | 0.202708  | -1.180149 | -2.980077 | H             | -2.615228 | -0.269217 | 2.933388  |
| H            | 1.353582  | -2.859359 | -4.407430 | H             | 0.157904  | 3.620558  | -1.407474 |
|              |           |           |           | H             | 1.945618  | 5.210644  | -1.966375 |
|              |           |           |           | H             | 4.330356  | 4.545190  | -1.737456 |
| === TS-8 === |           |           |           | H             | 4.888004  | 2.257593  | -0.946286 |
| B            | -2.232057 | -0.487956 | 0.088228  | H             | 3.107007  | 0.666963  | -0.394278 |
| B            | 0.274612  | 1.021541  | -0.473279 | H             | 1.034800  | -1.055331 | -0.277107 |
| C            | -3.540269 | -1.265618 | 0.519030  | C             | 0.039341  | -2.035551 | -0.211643 |
| C            | -3.499205 | -2.453514 | 1.270620  | H             | 1.604424  | -0.867124 | 0.626139  |
| C            | -4.660950 | -3.096314 | 1.696487  | H             | 1.618505  | -0.967686 | -1.188573 |
| C            | -5.910450 | -2.561624 | 1.386971  | H             | -0.254608 | -2.379155 | 0.775457  |
| C            | -5.983784 | -1.377223 | 0.655745  | C             | -0.359259 | -2.919645 | -1.305326 |
| C            | -4.815840 | -0.743261 | 0.233435  | C             | -1.070837 | -4.106713 | -1.025525 |
| C            | -1.845698 | -0.039097 | -1.309101 | C             | -0.030981 | -2.680347 | -2.655785 |
| C            | -3.519954 | -1.178008 | -2.833598 | C             | -1.440316 | -4.993110 | -2.029898 |
| C            | -1.639007 | 0.328487  | -3.515932 | H             | -1.326204 | -4.335672 | 0.003429  |
| C            | -0.620972 | 0.976973  | -2.900281 | C             | -0.399365 | -3.568637 | -3.660784 |
| C            | -0.361389 | 0.971117  | 0.919199  | H             | 0.517910  | -1.785817 | -2.923882 |
| C            | 1.226384  | 2.269464  | 2.393841  | C             | -1.111507 | -4.731179 | -3.361601 |
| C            | -0.797008 | 0.969213  | 3.122131  | H             | -1.982695 | -5.897089 | -1.772654 |
| C            | -1.762217 | 0.236330  | 2.518335  | H             | -0.124344 | -3.352828 | -4.688520 |
| C            | 1.475043  | 2.003752  | -0.849186 | H             | -1.395117 | -5.422940 | -4.146642 |
| C            | 1.192761  | 3.306490  | -1.304998 |               |           |           |           |
| C            | 2.202376  | 4.214086  | -1.622085 |               |           |           |           |
| C            | 3.540666  | 3.843319  | -1.492415 | === TS-8* === |           |           |           |
| C            | 3.850920  | 2.560647  | -1.046880 | B             | -2.207403 | -0.352149 | 0.190368  |
| C            | 2.831956  | 1.659219  | -0.733496 | B             | 0.363470  | 1.057171  | -0.419587 |
| N            | -2.383789 | -0.313343 | -2.550500 | C             | -3.543819 | -1.089998 | 0.596135  |
| N            | -0.736292 | 0.748797  | -1.531699 | C             | -3.706273 | -2.481375 | 0.488656  |
| N            | 0.065348  | 1.426431  | 2.143566  | C             | -4.907983 | -3.107683 | 0.818938  |
| N            | -1.497134 | 0.231336  | 1.147341  | C             | -5.990155 | -2.355095 | 1.270203  |
| H            | -2.539081 | -2.887872 | 1.526146  | C             | -5.857131 | -0.971977 | 1.392804  |
| H            | -4.590762 | -4.015208 | 2.269185  | C             | -4.651724 | -0.354944 | 1.062768  |
| H            | -6.816114 | -3.059106 | 1.716301  | C             | -1.726465 | -0.097169 | -1.222820 |
| H            | -6.950068 | -0.943497 | 0.420019  | C             | -3.466292 | -1.220150 | -2.683862 |
| H            | -4.897246 | 0.188573  | -0.317954 | C             | -1.412287 | -0.004000 | -3.447131 |
| H            | -3.470264 | -2.071099 | -2.213543 | C             | -0.390604 | 0.669664  | -2.861232 |

|   |           |           |           |           |           |           |           |
|---|-----------|-----------|-----------|-----------|-----------|-----------|-----------|
| C | -0.353056 | 1.177078  | 0.931304  | C         | 0.233104  | -2.720104 | 3.845082  |
| C | 1.163626  | 2.647278  | 2.315243  | H         | 0.898592  | -1.056084 | 2.679678  |
| C | -0.903210 | 1.449924  | 3.091723  | C         | -0.355790 | -3.985246 | 3.851326  |
| C | -1.830458 | 0.632382  | 2.540227  | H         | -1.188188 | -5.543923 | 2.618916  |
| C | 1.529955  | 2.056365  | -0.867281 | H         | 0.537270  | -2.262003 | 4.780856  |
| C | 1.185422  | 3.301741  | -1.428975 | H         | -0.511458 | -4.516473 | 4.783293  |
| C | 2.149574  | 4.231406  | -1.815676 |           |           |           |           |
| C | 3.504007  | 3.940872  | -1.653052 | === 8 === |           |           |           |
| C | 3.875614  | 2.714972  | -1.106408 | B         | -1.866487 | -0.844614 | -0.076453 |
| C | 2.901372  | 1.790777  | -0.723601 | B         | 0.420002  | 0.742810  | -0.515507 |
| N | -2.245070 | -0.466299 | -2.451381 | C         | -3.296982 | -1.500695 | 0.302198  |
| N | -0.588390 | 0.634329  | -1.486351 | C         | -3.521248 | -2.877162 | 0.458863  |
| N | 0.006190  | 1.787598  | 2.108795  | C         | -4.776304 | -3.388701 | 0.799571  |
| N | -1.507235 | 0.469791  | 1.191051  | C         | -5.855043 | -2.531963 | 1.000780  |
| H | -2.871804 | -3.087601 | 0.157480  | C         | -5.665440 | -1.156974 | 0.857696  |
| H | -4.996220 | -4.185599 | 0.731415  | C         | -4.409449 | -0.660844 | 0.514332  |
| H | -6.925483 | -2.839910 | 1.527952  | C         | -1.842164 | 0.066012  | -1.420764 |
| H | -6.693135 | -0.374377 | 1.741169  | C         | -3.852844 | -0.532186 | -2.828156 |
| H | -4.575484 | 0.724635  | 1.156034  | C         | -1.973796 | 1.022755  | -3.435414 |
| H | -3.349097 | -2.265671 | -2.389579 | C         | -0.826150 | 1.445262  | -2.836728 |
| H | -3.703227 | -1.173333 | -3.746804 | C         | -0.353689 | 0.953820  | 0.898425  |
| H | -4.292268 | -0.793840 | -2.114777 | C         | 1.003139  | 2.489474  | 2.375729  |
| H | -1.624470 | -0.177129 | -4.488868 | C         | -1.065471 | 1.211203  | 3.001696  |
| H | 0.447919  | 1.177576  | -3.302881 | C         | -1.908043 | 0.351225  | 2.368700  |
| H | 2.093927  | 2.085118  | 2.213379  | C         | 1.613500  | 1.771402  | -0.869073 |
| H | 1.107322  | 3.061933  | 3.321457  | C         | 1.374063  | 3.151880  | -1.012458 |
| H | 1.171957  | 3.462167  | 1.591636  | C         | 2.391257  | 4.055107  | -1.317149 |
| H | -0.811304 | 1.818402  | 4.099445  | C         | 3.699212  | 3.599777  | -1.486339 |
| H | -2.683171 | 0.150779  | 2.982110  | C         | 3.968835  | 2.239695  | -1.352063 |
| H | 0.136468  | 3.551430  | -1.561424 | C         | 2.938661  | 1.345269  | -1.052182 |
| H | 1.844943  | 5.182355  | -2.240535 | N         | -2.596690 | 0.160409  | -2.546322 |
| H | 4.258849  | 4.660333  | -1.951227 | N         | -0.762406 | 0.850257  | -1.595723 |
| H | 4.925977  | 2.473803  | -0.979715 | N         | -0.096444 | 1.575698  | 2.077291  |
| H | 3.225926  | 0.844332  | -0.306605 | N         | -1.458202 | 0.205348  | 1.073433  |
| C | 1.210468  | -0.897359 | -0.074048 | H         | -2.707241 | -3.572894 | 0.301713  |
| C | 0.300168  | -1.935670 | 0.135501  | H         | -4.908068 | -4.460562 | 0.906748  |
| H | 1.890623  | -0.650127 | 0.735337  | H         | -6.829885 | -2.927100 | 1.265743  |
| H | 1.661617  | -0.831923 | -1.059661 | H         | -6.495252 | -0.474676 | 1.013206  |
| H | -0.083638 | -2.457610 | -0.734981 | H         | -4.290334 | 0.415053  | 0.410042  |
| C | 0.056812  | -2.592533 | 1.411397  | H         | -3.872444 | -1.482305 | -2.301858 |
| C | -0.536840 | -3.874012 | 1.443341  | H         | -3.915878 | -0.714479 | -3.901290 |
| C | 0.437440  | -2.036043 | 2.651788  | H         | -4.707738 | 0.067661  | -2.510545 |
| C | -0.737540 | -4.556954 | 2.635718  | H         | -2.396763 | 1.251164  | -4.398797 |
| H | -0.819836 | -4.342787 | 0.505660  | H         | -0.058264 | 2.106632  | -3.198158 |

|            |           |           |           |   |           |           |           |
|------------|-----------|-----------|-----------|---|-----------|-----------|-----------|
| H          | 1.789022  | 2.365221  | 1.636994  | C | 1.677959  | 1.775647  | -0.791304 |
| H          | 1.397991  | 2.259179  | 3.366377  | C | 1.442994  | 3.079093  | -1.270050 |
| H          | 0.658990  | 3.526100  | 2.357118  | C | 2.479231  | 3.924422  | -1.664315 |
| H          | -1.064217 | 1.591535  | 4.009001  | C | 3.802262  | 3.488392  | -1.586215 |
| H          | -2.778477 | -0.163490 | 2.735710  | C | 4.068322  | 2.204752  | -1.115278 |
| H          | 0.364742  | 3.533278  | -0.877318 | C | 3.019885  | 1.366276  | -0.729872 |
| H          | 2.166969  | 5.112061  | -1.420552 | N | -2.400637 | -0.220991 | -2.389100 |
| H          | 4.496261  | 4.296884  | -1.721443 | N | -0.635239 | 0.676165  | -1.486898 |
| H          | 4.981372  | 1.872367  | -1.484547 | N | -0.248960 | 2.152231  | 1.986161  |
| H          | 3.175278  | 0.290665  | -0.959813 | N | -1.504828 | 0.545192  | 1.223463  |
| C          | 0.769648  | -0.870483 | -0.508767 | H | -2.637547 | -3.408544 | 0.773802  |
| C          | -0.468435 | -1.783128 | -0.172266 | H | -4.869779 | -4.319990 | 1.205240  |
| H          | 1.582514  | -1.091022 | 0.193190  | H | -6.838479 | -2.811389 | 1.355462  |
| H          | 1.154524  | -1.133701 | -1.500387 | H | -6.523513 | -0.362936 | 1.048020  |
| H          | -0.332867 | -2.159320 | 0.849140  | H | -4.294239 | 0.546876  | 0.583679  |
| C          | -0.519052 | -3.003078 | -1.069328 | H | -3.786875 | -1.692987 | -1.839047 |
| C          | -0.350080 | -4.290238 | -0.536660 | H | -3.617178 | -1.419627 | -3.586238 |
| C          | -0.702797 | -2.908048 | -2.458632 | H | -4.503230 | -0.250718 | -2.576710 |
| C          | -0.384023 | -5.428992 | -1.340731 | H | -2.080287 | 0.467221  | -4.410658 |
| H          | -0.185042 | -4.398747 | 0.531295  | H | 0.175958  | 1.580988  | -3.265574 |
| C          | -0.739311 | -4.041359 | -3.268212 | H | 1.645766  | 2.902618  | 1.513924  |
| H          | -0.803843 | -1.932427 | -2.920980 | H | 1.119323  | 3.174280  | 3.188341  |
| C          | -0.584918 | -5.311837 | -2.714226 | H | 0.431235  | 4.145679  | 1.864371  |
| H          | -0.248025 | -6.407732 | -0.892335 | H | -1.355505 | 2.556470  | 3.797538  |
| H          | -0.882610 | -3.931525 | -4.338396 | H | -2.933399 | 0.502353  | 2.836887  |
| H          | -0.611220 | -6.193754 | -3.344458 | H | 0.422037  | 3.448062  | -1.332247 |
|            |           |           |           | H | 2.257454  | 4.922278  | -2.029346 |
|            |           |           |           | H | 4.613537  | 4.141305  | -1.889603 |
| === 8* === |           |           |           | H | 5.092815  | 1.852558  | -1.051231 |
| B          | -1.820339 | -0.709672 | 0.279843  | H | 3.255569  | 0.369498  | -0.372667 |
| B          | 0.467837  | 0.809331  | -0.332539 | C | 0.838425  | -0.753477 | 0.041559  |
| C          | -3.261429 | -1.350231 | 0.640263  | C | -0.426126 | -1.655774 | 0.306116  |
| C          | -3.476448 | -2.725789 | 0.820690  | H | 1.485674  | -0.773839 | 0.924797  |
| C          | -4.746953 | -3.250229 | 1.070306  | H | 1.431856  | -1.191976 | -0.770290 |
| C          | -5.851908 | -2.406977 | 1.156150  | H | -0.523825 | -2.331196 | -0.552100 |
| C          | -5.672675 | -1.034053 | 0.985224  | C | -0.222291 | -2.554307 | 1.511717  |
| C          | -4.400636 | -0.525177 | 0.728824  | C | -0.073884 | -3.939654 | 1.345791  |
| C          | -1.723881 | -0.068537 | -1.220688 | C | -0.132683 | -2.055604 | 2.821243  |
| C          | -3.655388 | -0.938253 | -2.608230 | C | 0.137386  | -4.791806 | 2.429137  |
| C          | -1.720533 | 0.447902  | -3.396033 | H | -0.119636 | -4.356439 | 0.343699  |
| C          | -0.615409 | 0.999908  | -2.825601 | C | 0.076406  | -2.901087 | 3.908601  |
| C          | -0.406370 | 1.279581  | 0.958082  | H | -0.227058 | -0.991209 | 2.998800  |
| C          | 0.800013  | 3.156563  | 2.145342  | C | 0.210003  | -4.276498 | 3.721187  |
| C          | -1.276528 | 1.966002  | 2.900641  | H | 0.249217  | -5.858041 | 2.261230  |
| C          | -2.053790 | 0.959392  | 2.419021  |   |           |           |           |



|                                                 |           |           |           |   |           |           |           |
|-------------------------------------------------|-----------|-----------|-----------|---|-----------|-----------|-----------|
| H                                               | 0.135104  | -2.483148 | 4.908448  | C | -1.178035 | 1.553963  | -2.621389 |
| H                                               | 0.373319  | -4.933824 | 4.567965  | C | -0.360095 | 1.701851  | 1.094869  |
|                                                 |           |           |           | C | 1.588625  | 2.771516  | 2.306334  |
| <b>Formation of 9 and 9*</b>                    |           |           |           | C | -0.353267 | 1.579422  | 3.346937  |
| <b>=== Ph<sub>2</sub>C=C=CH<sub>2</sub> ===</b> |           |           |           | C | -1.485574 | 0.970152  | 2.922548  |
| C                                               | -0.258434 | -2.527360 | -1.131898 | C | 1.153214  | 2.728750  | -0.979147 |
| C                                               | -1.169005 | -3.432902 | -0.841145 | C | 1.018656  | 4.009787  | -1.547641 |
| C                                               | -2.329868 | -3.646702 | -1.758401 | C | 2.101539  | 4.681550  | -2.113404 |
| C                                               | -3.608685 | -3.902810 | -1.243079 | C | 3.362472  | 4.085659  | -2.131342 |
| C                                               | -2.174351 | -3.564695 | -3.148903 | C | 3.524818  | 2.814241  | -1.584233 |
| C                                               | -4.699320 | -4.062622 | -2.094178 | C | 2.434364  | 2.149771  | -1.021481 |
| H                                               | -3.750299 | -3.967461 | -0.170705 | N | -2.997017 | 0.479417  | -1.950232 |
| C                                               | -3.264821 | -3.726132 | -3.999018 | N | -1.144674 | 1.487442  | -1.223156 |
| H                                               | -1.189401 | -3.377293 | -3.560917 | N | 0.341352  | 2.033674  | 2.252994  |
| C                                               | -4.532684 | -3.975942 | -3.475500 | N | -1.516502 | 1.034578  | 1.523088  |
| H                                               | -5.681784 | -4.252449 | -1.676130 | H | -2.817994 | -1.958576 | 1.865484  |
| H                                               | -3.122534 | -3.664057 | -5.072299 | H | -4.786591 | -3.035190 | 2.869888  |
| H                                               | -5.381604 | -4.104755 | -4.137393 | H | -6.982596 | -1.871074 | 2.878592  |
| C                                               | 0.642048  | -1.631501 | -1.419031 | H | -7.170901 | 0.394510  | 1.878250  |
| H                                               | 0.560449  | -0.607231 | -1.063345 | H | -5.196639 | 1.479204  | 0.884372  |
| H                                               | 1.511553  | -1.871471 | -2.026226 | H | -4.112349 | -1.234398 | -1.465892 |
| C                                               | -1.041035 | -4.246576 | 0.406394  | H | -4.451384 | -0.509693 | -3.048275 |
| C                                               | -0.549161 | -3.678320 | 1.589377  | H | -5.060108 | 0.260027  | -1.565065 |
| C                                               | -1.381003 | -5.607036 | 0.409565  | H | -2.669834 | 0.777580  | -4.046684 |
| C                                               | -0.393455 | -4.447754 | 2.738984  | H | -0.391115 | 2.022336  | -3.184074 |
| H                                               | -0.292401 | -2.625299 | 1.603259  | H | 2.412114  | 2.194183  | 1.878357  |
| C                                               | -1.223432 | -6.376434 | 1.559592  | H | 1.815733  | 2.994169  | 3.349155  |
| H                                               | -1.761220 | -6.065639 | -0.495620 | H | 1.505042  | 3.708851  | 1.752685  |
| C                                               | -0.729911 | -5.800742 | 2.729421  | H | 0.010762  | 1.731049  | 4.349943  |
| H                                               | -0.015492 | -3.988007 | 3.645523  | H | -2.277109 | 0.508020  | 3.483960  |
| H                                               | -1.484639 | -7.428778 | 1.540011  | H | 0.047016  | 4.495044  | -1.538503 |
| H                                               | -0.611661 | -6.399665 | 3.625336  | H | 1.963266  | 5.671533  | -2.535700 |
| <b>=== RC ===</b>                               |           |           |           | H | 4.207674  | 4.605473  | -2.569232 |
| B                                               | -2.573043 | 0.548923  | 0.650000  | H | 4.499351  | 2.337145  | -1.600227 |
| B                                               | -0.089630 | 1.980403  | -0.347670 | H | 2.581195  | 1.154978  | -0.611431 |
| C                                               | -3.842588 | -0.151441 | 1.281592  | C | -0.287986 | -3.117423 | -1.109361 |
| C                                               | -3.766030 | -1.429376 | 1.865675  | C | -1.115369 | -4.138117 | -1.016344 |
| C                                               | -4.880072 | -2.045745 | 2.434381  | C | -2.158728 | -4.340724 | -2.068397 |
| C                                               | -6.113379 | -1.394650 | 2.438180  | C | -3.457735 | -4.739539 | -1.720868 |
| C                                               | -6.217958 | -0.124601 | 1.873577  | C | -1.873251 | -4.103348 | -3.419968 |
| C                                               | -5.097117 | 0.484225  | 1.308025  | C | -4.440874 | -4.889441 | -2.695990 |
| C                                               | -2.296480 | 0.815894  | -0.795599 | H | -3.700475 | -4.923883 | -0.681033 |
| C                                               | -4.226140 | -0.292086 | -2.004465 | C | -2.856209 | -4.254468 | -4.394563 |
| C                                               | -2.307180 | 0.935942  | -3.044381 | H | -0.870932 | -3.802762 | -3.702683 |

|                |           |           |           |   |           |           |           |
|----------------|-----------|-----------|-----------|---|-----------|-----------|-----------|
| C              | -4.145050 | -4.649006 | -4.037253 | N | 0.016990  | 1.347587  | 2.169412  |
| H              | -5.440997 | -5.192331 | -2.405792 | N | -1.431881 | 0.012891  | 1.181820  |
| H              | -2.611896 | -4.073771 | -5.435751 | H | -2.474058 | -2.955815 | 1.746825  |
| H              | -4.909387 | -4.773166 | -4.796230 | H | -4.516839 | -4.098443 | 2.489869  |
| C              | 0.519287  | -2.100659 | -1.201622 | H | -6.749253 | -3.262993 | 1.786655  |
| H              | 0.281130  | -1.140004 | -0.750112 | H | -6.901995 | -1.257428 | 0.328758  |
| H              | 1.460469  | -2.171282 | -1.741859 | H | -4.860465 | -0.117723 | -0.427847 |
| C              | -1.015163 | -5.086171 | 0.134184  | H | -3.531583 | -2.272888 | -2.017835 |
| C              | -0.626182 | -4.637803 | 1.404643  | H | -3.250296 | -2.025726 | -3.743952 |
| C              | -1.273480 | -6.453741 | -0.038910 | H | -4.273568 | -0.883088 | -2.837395 |
| C              | -0.493638 | -5.527828 | 2.466338  | H | -1.583604 | -0.356667 | -4.525168 |
| H              | -0.426455 | -3.582925 | 1.554223  | H | 0.435622  | 1.024200  | -3.294390 |
| C              | -1.140058 | -7.344055 | 1.023974  | H | 2.070100  | 1.771523  | 2.432999  |
| H              | -1.570412 | -6.823118 | -1.013251 | H | 0.941381  | 2.679944  | 3.457917  |
| C              | -0.750678 | -6.886072 | 2.281471  | H | 1.112483  | 3.090994  | 1.739338  |
| H              | -0.195044 | -5.159040 | 3.441555  | H | -0.831773 | 1.276710  | 4.143146  |
| H              | -1.337495 | -8.398819 | 0.866890  | H | -2.642901 | -0.388674 | 2.931527  |
| H              | -0.650414 | -7.579228 | 3.109061  | H | -0.075792 | 3.072185  | -1.951911 |
|                |           |           |           | H | 1.357520  | 4.983919  | -2.473538 |
|                |           |           |           | H | 3.690414  | 5.079597  | -1.612987 |
| ==== TS-9 ==== |           |           |           | H | 4.539906  | 3.218483  | -0.200259 |
| B              | -2.185700 | -0.684257 | 0.138728  | H | 3.107568  | 1.308363  | 0.325628  |
| B              | 0.375033  | 0.815552  | -0.425392 | C | 1.382956  | -1.249784 | -0.460461 |
| C              | -3.492164 | -1.454478 | 0.573613  | C | 0.581689  | -2.361338 | -0.192911 |
| C              | -3.437414 | -2.579467 | 1.418003  | C | 0.063429  | -3.161600 | -1.342475 |
| C              | -4.594792 | -3.228904 | 1.845870  | C | -1.123004 | -3.920408 | -1.269142 |
| C              | -5.847802 | -2.761667 | 1.451661  | C | 0.770044  | -3.220235 | -2.559386 |
| C              | -5.931885 | -1.638719 | 0.629882  | C | -1.553915 | -4.714347 | -2.326326 |
| C              | -4.770149 | -0.998907 | 0.200024  | H | -1.729846 | -3.872339 | -0.375273 |
| C              | -1.706150 | -0.368316 | -1.263621 | C | 0.336598  | -4.008205 | -3.622433 |
| C              | -3.386159 | -1.521163 | -2.787332 | H | 1.675211  | -2.639464 | -2.672274 |
| C              | -1.393880 | -0.190165 | -3.478265 | C | -0.825171 | -4.770086 | -3.515363 |
| C              | -0.403071 | 0.504722  | -2.868985 | H | -2.470332 | -5.286603 | -2.222835 |
| C              | -0.291316 | 0.761036  | 0.961632  | H | 0.919306  | -4.032239 | -4.537631 |
| C              | 1.101951  | 2.274820  | 2.459086  | H | -1.157558 | -5.392448 | -4.338782 |
| C              | -0.894523 | 0.940219  | 3.122268  | C | 2.620859  | -1.085326 | -0.903751 |
| C              | -1.785327 | 0.117169  | 2.528487  | H | 3.057152  | -0.131308 | -1.164941 |
| C              | 1.392546  | 1.995426  | -0.788509 | H | 3.270809  | -1.952725 | -1.032912 |
| C              | 0.941306  | 3.076227  | -1.573869 | C | 0.533828  | -2.879643 | 1.185148  |
| C              | 1.749918  | 4.172561  | -1.869185 | C | 0.189793  | -4.216662 | 1.497512  |
| C              | 3.054979  | 4.231379  | -1.383086 | C | 0.960747  | -2.076409 | 2.268306  |
| C              | 3.528677  | 3.186697  | -0.592700 | C | 0.234720  | -4.696374 | 2.802276  |
| C              | 2.709539  | 2.095700  | -0.302833 | H | -0.076401 | -4.902631 | 0.706156  |
| N              | -2.190907 | -0.741808 | -2.502576 | C | 0.997715  | -2.558178 | 3.570765  |
| N              | -0.585864 | 0.402487  | -1.496241 |   |           |           |           |

|                 |           |           |           |             |           |           |           |
|-----------------|-----------|-----------|-----------|-------------|-----------|-----------|-----------|
| H               | 1.283760  | -1.064022 | 2.070031  | H           | 1.787965  | 2.965734  | 2.854722  |
| C               | 0.625413  | -3.871592 | 3.856933  | H           | 1.252941  | 3.607440  | 1.286730  |
| H               | -0.025294 | -5.732753 | 2.992267  | H           | 0.213636  | 1.545225  | 4.015699  |
| H               | 1.328153  | -1.903012 | 4.370466  | H           | -1.925036 | -0.026993 | 3.327722  |
| H               | 0.656782  | -4.248354 | 4.872892  | H           | -0.298305 | 4.167150  | -1.797211 |
| ==== TS-9* ==== |           |           |           | H           | 1.487471  | 5.450267  | -2.898180 |
| B               | -2.314278 | -0.269335 | 0.498105  | H           | 3.760237  | 4.478553  | -3.141539 |
| B               | -0.215988 | 1.601225  | -0.671772 | H           | 4.216755  | 2.196054  | -2.275596 |
| C               | -3.666577 | -0.669797 | 1.264197  | H           | 2.428861  | 0.905778  | -1.177425 |
| C               | -4.155685 | -1.968387 | 1.459979  | C           | -0.982736 | -2.053490 | 0.135377  |
| C               | -5.362020 | -2.209199 | 2.121533  | C           | -1.568984 | -3.237089 | -0.287910 |
| C               | -6.121184 | -1.149397 | 2.610406  | C           | -2.211387 | -3.336509 | -1.610399 |
| C               | -5.660036 | 0.155310  | 2.433404  | C           | -3.360265 | -4.122220 | -1.839798 |
| C               | -4.454349 | 0.383569  | 1.773198  | C           | -1.665589 | -2.650100 | -2.713345 |
| C               | -2.354417 | 0.292922  | -0.936881 | C           | -3.923863 | -4.226161 | -3.107706 |
| C               | -4.549037 | -0.561406 | -1.863211 | H           | -3.814070 | -4.652521 | -1.011076 |
| C               | -2.825339 | 0.790342  | -3.074982 | C           | -2.227227 | -2.757543 | -3.981467 |
| C               | -1.624675 | 1.348007  | -2.795101 | H           | -0.777656 | -2.046879 | -2.564768 |
| C               | -0.351465 | 1.327807  | 0.803543  | C           | -3.358798 | -3.547776 | -4.189225 |
| C               | 1.511462  | 2.699696  | 1.834738  | H           | -4.809305 | -4.836237 | -3.252087 |
| C               | -0.184701 | 1.301865  | 3.044849  | H           | -1.772757 | -2.231297 | -4.814280 |
| C               | -1.246381 | 0.528188  | 2.705695  | H           | -3.790999 | -3.638764 | -5.179607 |
| C               | 0.919751  | 2.431602  | -1.385723 | C           | 0.269618  | -1.733968 | 0.458812  |
| C               | 0.687178  | 3.721608  | -1.897763 | H           | 0.564245  | -0.860972 | 1.019958  |
| C               | 1.696424  | 4.454566  | -2.521297 | H           | 1.080144  | -2.397090 | 0.158327  |
| C               | 2.973529  | 3.911118  | -2.656570 | C           | -1.486187 | -4.424182 | 0.585621  |
| C               | 3.229026  | 2.631509  | -2.166916 | C           | -1.339985 | -4.303442 | 1.984779  |
| C               | 2.214805  | 1.905519  | -1.542402 | C           | -1.484254 | -5.733173 | 0.054455  |
| N               | -3.285545 | 0.163156  | -1.937646 | C           | -1.198059 | -5.419452 | 2.799881  |
| N               | -1.335930 | 1.078194  | -1.453796 | H           | -1.198059 | -5.419452 | 2.799881  |
| N               | 0.376836  | 1.792361  | 1.888204  | H           | -1.345604 | -3.315730 | 2.428188  |
| N               | -1.359680 | 0.532040  | 1.320864  | C           | -1.338952 | -6.848139 | 0.873604  |
| H               | -3.587994 | -2.811470 | 1.092163  | H           | -1.562250 | -5.874808 | -1.015891 |
| H               | -5.704790 | -3.229844 | 2.256323  | C           | -1.198260 | -6.703902 | 2.253375  |
| H               | -7.058283 | -1.335172 | 3.124182  | H           | -1.095424 | -5.286642 | 3.871856  |
| H               | -6.239416 | 0.993076  | 2.807940  | H           | -1.325185 | -7.836948 | 0.427051  |
| H               | -4.116572 | 1.408329  | 1.645687  | H           | -1.090049 | -7.574318 | 2.890486  |
| H               | -4.376617 | -1.636064 | -1.793647 | ==== 9 ==== |           |           |           |
| H               | -5.113690 | -0.349952 | -2.770674 | B           | -1.698613 | -0.961021 | 0.138767  |
| H               | -5.121950 | -0.233150 | -0.997675 | B           | 0.488811  | 0.726825  | -0.488081 |
| H               | -3.394941 | 0.789397  | -3.988672 | C           | -3.101373 | -1.605506 | 0.649614  |
| H               | -0.963714 | 1.929652  | -3.411566 | C           | -3.220756 | -2.759108 | 1.442866  |
| H               | 2.366997  | 2.232404  | 1.343267  | C           | -4.450472 | -3.191911 | 1.943939  |
|                 |           |           |           | C           | -5.612912 | -2.472503 | 1.678914  |

|   |           |           |           |            |           |           |           |
|---|-----------|-----------|-----------|------------|-----------|-----------|-----------|
| C | -5.528455 | -1.309564 | 0.914543  | C          | 0.421240  | -2.622862 | -2.382391 |
| C | -4.294539 | -0.891829 | 0.418537  | C          | -1.548439 | -4.571410 | -2.400943 |
| C | -1.693850 | -0.265463 | -1.344099 | H          | -2.002899 | -3.923421 | -0.425641 |
| C | -3.525141 | -1.316340 | -2.748919 | C          | 0.235005  | -3.423373 | -3.511882 |
| C | -1.719363 | 0.222879  | -3.523927 | H          | 1.205531  | -1.880367 | -2.398539 |
| C | -0.643422 | 0.835573  | -2.965629 | C          | -0.748445 | -4.406385 | -3.531275 |
| C | -0.381371 | 1.090671  | 0.837692  | H          | -2.318857 | -5.335580 | -2.384642 |
| C | 0.678234  | 3.066810  | 2.015017  | H          | 0.874346  | -3.275741 | -4.376247 |
| C | -1.325749 | 1.744001  | 2.752010  | H          | -0.885814 | -5.036518 | -4.403270 |
| C | -2.014210 | 0.668451  | 2.285593  | C          | 2.206137  | -1.271880 | -0.106152 |
| C | 1.526533  | 1.916531  | -0.875823 | H          | 3.061983  | -0.639642 | -0.297557 |
| C | 1.055947  | 3.066073  | -1.544475 | H          | 2.441404  | -2.308493 | 0.121953  |
| C | 1.868263  | 4.167248  | -1.814032 | C          | 0.104828  | -2.709739 | 1.274154  |
| C | 3.201865  | 4.168181  | -1.409412 | C          | 0.452011  | -4.067447 | 1.208025  |
| C | 3.694134  | 3.061986  | -0.722291 | C          | 0.147326  | -2.114531 | 2.548087  |
| C | 2.869018  | 1.966546  | -0.460182 | C          | 0.787686  | -4.799027 | 2.349821  |
| N | -2.364221 | -0.462143 | -2.508366 | H          | 0.467716  | -4.573535 | 0.252539  |
| N | -0.647299 | 0.540409  | -1.618079 | C          | 0.475161  | -2.838900 | 3.689028  |
| N | -0.311009 | 2.002282  | 1.840941  | H          | -0.068955 | -1.062019 | 2.657933  |
| N | -1.411814 | 0.274981  | 1.108824  | C          | 0.793537  | -4.194300 | 3.601354  |
| H | -2.337353 | -3.332336 | 1.693776  | H          | 1.051109  | -5.846899 | 2.249440  |
| H | -4.494972 | -4.091057 | 2.549728  | H          | 0.487175  | -2.339024 | 4.652133  |
| H | -6.568606 | -2.806928 | 2.067912  | H          | 1.050755  | -4.760705 | 4.489517  |
| H | -6.421000 | -0.727692 | 0.707746  |            |           |           |           |
| H | -4.259233 | 0.027209  | -0.160638 | === 9* === |           |           |           |
| H | -3.692989 | -1.953606 | -1.888549 | B          | -2.634419 | -0.262608 | 0.065243  |
| H | -3.327299 | -1.941786 | -3.619690 | B          | -0.002967 | 0.661958  | -0.370800 |
| H | -4.414778 | -0.707643 | -2.926680 | C          | -4.164812 | -0.454701 | 0.555396  |
| H | -2.075515 | 0.202894  | -4.539709 | C          | -4.544029 | -1.474607 | 1.442930  |
| H | 0.118892  | 1.439051  | -3.423857 | C          | -5.823276 | -1.540387 | 1.995172  |
| H | 1.650022  | 2.648276  | 2.277995  | C          | -6.773712 | -0.570001 | 1.683790  |
| H | 0.336861  | 3.716270  | 2.820459  | C          | -6.421913 | 0.473316  | 0.829406  |
| H | 0.779293  | 3.646507  | 1.100642  | C          | -5.137307 | 0.526113  | 0.287471  |
| H | -1.464266 | 2.345825  | 3.633673  | C          | -2.331712 | 0.461402  | -1.377700 |
| H | -2.867788 | 0.158154  | 2.694549  | C          | -4.350207 | 0.267968  | -2.902141 |
| H | 0.015747  | 3.120520  | -1.847658 | C          | -2.073684 | 1.105327  | -3.507315 |
| H | 1.456776  | 5.026381  | -2.334231 | C          | -0.890296 | 1.283773  | -2.862799 |
| H | 3.841477  | 5.018882  | -1.617762 | C          | -0.762363 | 1.269390  | 0.926365  |
| H | 4.724782  | 3.049036  | -0.382573 | C          | 0.804824  | 2.743221  | 2.250963  |
| H | 3.288121  | 1.149638  | 0.110368  | C          | -1.514973 | 2.024234  | 2.889157  |
| C | 0.945826  | -0.831781 | -0.181967 | C          | -2.482959 | 1.249771  | 2.330949  |
| C | -0.223492 | -1.865783 | 0.022943  | C          | 1.440167  | 1.282306  | -0.744813 |
| C | -0.371652 | -2.765758 | -1.234460 | C          | 1.585760  | 2.620358  | -1.159793 |
| C | -1.364955 | -3.762886 | -1.282622 | C          | 2.828010  | 3.171378  | -1.471339 |

|   |           |           |           |   |           |           |           |
|---|-----------|-----------|-----------|---|-----------|-----------|-----------|
| C | 3.981026  | 2.392343  | -1.369754 | C | -1.711598 | -2.822855 | -0.211060 |
| C | 3.871045  | 1.065915  | -0.959057 | C | -3.015439 | -3.493654 | -0.504953 |
| C | 2.619424  | 0.524831  | -0.656867 | C | -3.444198 | -4.599212 | 0.248091  |
| N | -2.963758 | 0.589930  | -2.575713 | C | -3.801149 | -3.106712 | -1.597070 |
| N | -1.064474 | 0.891354  | -1.554126 | C | -4.635038 | -5.254255 | -0.047804 |
| N | -0.442906 | 2.025084  | 2.005921  | H | -2.836717 | -4.942101 | 1.078658  |
| N | -2.001092 | 0.788148  | 1.123345  | C | -4.989965 | -3.767003 | -1.905379 |
| H | -3.822476 | -2.234781 | 1.713041  | H | -3.454283 | -2.295566 | -2.224402 |
| H | -6.077160 | -2.351432 | 2.669741  | C | -5.417787 | -4.838583 | -1.125851 |
| H | -7.770972 | -0.620453 | 2.107563  | H | -4.951705 | -6.095668 | 0.559350  |
| H | -7.142662 | 1.249651  | 0.592837  | H | -5.578199 | -3.450050 | -2.760430 |
| H | -4.882488 | 1.373006  | -0.343568 | H | -6.342823 | -5.352930 | -1.361409 |
| H | -4.772939 | -0.364201 | -2.128509 | C | -0.074242 | -0.953081 | -0.045798 |
| H | -4.377521 | -0.260903 | -3.856433 | H | 0.420873  | -1.133967 | 0.916678  |
| H | -4.946360 | 1.180004  | -2.982491 | H | 0.506653  | -1.515014 | -0.784916 |
| H | -2.363390 | 1.294862  | -4.526828 | C | -0.564211 | -3.797551 | -0.197803 |
| H | 0.052255  | 1.647472  | -3.232311 | C | 0.198831  | -4.007733 | 0.958584  |
| H | 1.558244  | 2.410170  | 1.544037  | C | -0.257545 | -4.558584 | -1.334928 |
| H | 1.145478  | 2.536587  | 3.267005  | C | 1.239293  | -4.935102 | 0.976681  |
| H | 0.655960  | 3.819176  | 2.133609  | H | -0.033236 | -3.440146 | 1.853075  |
| H | -1.488860 | 2.568139  | 3.818024  | C | 0.790509  | -5.476401 | -1.325541 |
| H | -3.461794 | 0.993475  | 2.695544  | H | -0.848261 | -4.427581 | -2.235227 |
| H | 0.705263  | 3.253842  | -1.235091 | C | 1.543284  | -5.670340 | -0.167908 |
| H | 2.898618  | 4.206567  | -1.789937 | H | 1.811016  | -5.085350 | 1.886457  |
| H | 4.950971  | 2.814795  | -1.608938 | H | 1.015827  | -6.045357 | -2.221328 |
| H | 4.759633  | 0.448334  | -0.877421 | H | 2.354096  | -6.390351 | -0.156709 |
| H | 2.563718  | -0.512691 | -0.345545 |   |           |           |           |
| C | -1.515451 | -1.492141 | -0.026176 |   |           |           |           |

**Supplementary Table 8.** Optimized geometries of **2'**, **annulated indole**, **2''**, **2''+2H**,  $C_6H_8$  and  $C_6H_6$  (atom, x-, y-, z-positions in Å).

=== **2'** ===

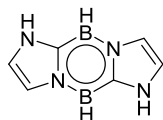

|   |          |          |           |   |          |          |           |
|---|----------|----------|-----------|---|----------|----------|-----------|
| N | 2.559492 | -1.08072 | 0.00013   | B | -0.02856 | -1.50445 | -0.000084 |
| C | 3.364642 | 0.032211 | 0.00028   | C | 1.22241  | -0.70273 | -0.000273 |
| C | 2.562223 | 1.124436 | -0.000077 | H | 2.870168 | -2.03622 | -0.000189 |
| N | -2.55947 | 1.080729 | 0.000216  | H | 4.439693 | -0.0343  | 0.000588  |
| C | -3.36466 | -0.03221 | 0.000034  | H | 2.814608 | 2.170133 | -0.000067 |
| C | -2.56221 | -1.12443 | -0.000004 | H | -2.8701  | 2.03625  | -0.000316 |
| N | 1.227745 | 0.694109 | -0.00026  | H | -4.43971 | 0.034311 | 0.000126  |
| B | 0.028538 | 1.504437 | -0.000048 | H | -2.81459 | -2.17013 | 0.00007   |
| C | -1.22241 | 0.702705 | 0.000032  | H | 0.107236 | 2.691279 | -0.000004 |
| N | -1.22775 | -0.69411 | -0.000015 | H | -0.10731 | -2.69128 | -0.000003 |

=== **annulated indole** ===

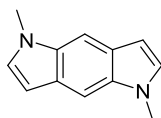

|   |          |          |          |   |          |          |          |
|---|----------|----------|----------|---|----------|----------|----------|
| C | -1.08775 | -0.83546 | 0.002968 | C | 2.603226 | 2.843835 | 0.014261 |
| C | -1.27504 | 0.585469 | 0.045156 | H | -0.28572 | 2.515027 | 0.073006 |
| C | -0.1652  | 1.43814  | 0.042049 | H | 0.285721 | -2.51503 | -0.07301 |
| C | 1.087745 | 0.835456 | -0.00297 | H | -4.34553 | -0.67158 | 0.08321  |
| C | 1.275043 | -0.58547 | -0.04516 | H | -3.20095 | 1.761324 | 0.121541 |
| C | 0.165197 | -1.43814 | -0.04205 | H | 4.345532 | 0.671582 | -0.08321 |
| N | -2.34518 | -1.42079 | 0.01657  | H | 3.200951 | -1.76132 | -0.12154 |
| C | -3.29626 | -0.41826 | 0.06549  | H | -3.6801  | -3.01114 | 0.004967 |
| C | -2.69383 | 0.809886 | 0.084204 | H | -2.19809 | -3.29849 | -0.92432 |
| N | 2.34518  | 1.420787 | -0.01657 | H | -2.15921 | -3.34406 | 0.85274  |
| C | 3.296263 | 0.418258 | -0.06549 | H | 2.159209 | 3.344058 | -0.85274 |
| C | 2.693834 | -0.80989 | -0.0842  | H | 2.198094 | 3.298488 | 0.924317 |
| C | -2.60323 | -2.84384 | -0.01426 | H | 3.680101 | 3.011144 | -0.00497 |

=== **2''** ===

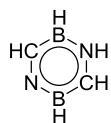

|   |          |          |           |   |           |          |           |
|---|----------|----------|-----------|---|-----------|----------|-----------|
| C | 1.871378 | 0.929715 | -0.564181 | C | -0.992731 | 1.003206 | -0.565137 |
|---|----------|----------|-----------|---|-----------|----------|-----------|

|   |           |           |           |   |           |           |           |
|---|-----------|-----------|-----------|---|-----------|-----------|-----------|
| H | -0.799606 | -1.386854 | -0.563563 | H | -2.070842 | 1.129136  | -0.565559 |
| H | 1.687537  | -1.079710 | -0.562964 | B | -0.287715 | -0.314444 | -0.564081 |
| H | 2.949490  | 0.803792  | -0.563759 | B | 1.166357  | 2.247370  | -0.565237 |
| H | 1.678264  | 3.319772  | -0.565755 | N | 1.150349  | -0.219530 | -0.563683 |
| H | -0.808892 | 3.012633  | -0.566353 | N | -0.271699 | 2.152456  | -0.565634 |

=== 2'' + 2H ===

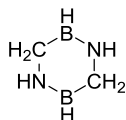

|   |           |           |           |   |           |           |           |
|---|-----------|-----------|-----------|---|-----------|-----------|-----------|
| C | 1.967489  | 0.920195  | -0.564000 | H | -1.759224 | 1.012069  | -1.437035 |
| C | -1.088840 | 1.012626  | -0.564959 | B | -0.248161 | -0.325865 | -0.564062 |
| H | -0.806583 | -1.383410 | -0.563663 | B | 1.126807  | 2.258700  | -0.565273 |
| H | 1.657540  | -1.161895 | -0.563062 | N | 1.139706  | -0.294023 | -0.563718 |
| H | 2.638392  | 0.919694  | -1.435679 | N | -0.261058 | 2.226855  | -0.565678 |
| H | 1.685236  | 3.316240  | -0.565913 | H | 2.637408  | 0.920764  | 0.308443  |
| H | -0.778898 | 3.094725  | -0.566489 | H | -1.759281 | 1.013128  | 0.307085  |

=== C<sub>6</sub>H<sub>8</sub> ===

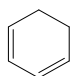

|   |           |           |           |   |           |           |           |
|---|-----------|-----------|-----------|---|-----------|-----------|-----------|
| C | 0.009680  | 0.161994  | -0.234330 | H | 1.457997  | -0.147668 | 1.296978  |
| C | 1.448056  | 0.082218  | 0.219899  | H | 3.148196  | 1.400852  | 0.510724  |
| C | 2.199644  | 1.399089  | -0.033279 | H | 1.867622  | 3.518107  | 0.630404  |
| C | 1.364850  | 2.601053  | 0.340296  | H | -0.573597 | 3.431455  | 0.459137  |
| C | 0.028080  | 2.555814  | 0.238028  | H | -1.693910 | 1.385499  | -0.482549 |
| C | -0.646887 | 1.331282  | -0.202453 | H | 1.965433  | -0.746248 | -0.271712 |
| H | -0.499006 | -0.751580 | -0.525165 | H | 2.459656  | 1.477101  | -1.100685 |

=== C<sub>6</sub>H<sub>6</sub> ===

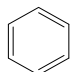

|   |           |          |           |   |           |           |           |
|---|-----------|----------|-----------|---|-----------|-----------|-----------|
| C | -0.101682 | 0.116230 | 0.000066  | H | -0.643928 | -0.823046 | 0.000435  |
| C | 1.292703  | 0.116199 | 0.000561  | H | 1.834822  | -0.823163 | 0.001366  |
| C | 1.989899  | 1.323534 | -0.000094 | H | 3.074451  | 1.323633  | 0.000189  |
| C | 1.292722  | 2.531162 | -0.001029 | H | 1.835208  | 3.470296  | -0.001439 |
| C | -0.101450 | 2.531187 | -0.001426 | H | -0.643797 | 3.470414  | -0.002263 |
| C | -0.798750 | 1.323669 | -0.000975 |   |           |           |           |

## Supplementary Methods

**Crystallographic Methods:** X-ray data collection and structural refinement. Intensity data for compounds **1-4**, **5a**, **6-10** and **11b** were collected using a Bruker APEX II diffractometer. The crystals of **1-4**, **5a**, **6**, **7**, **9**, **10** and **11b** were measured at 103(2) K and the crystals of **8** were measured at 153(2) K. The structure was solved by direct phase determination (SHELXS-2014) and refined for all data by full-matrix least squares methods on  $F^2$ . All non-hydrogen atoms were subjected to anisotropic refinement. The hydrogen atoms were generated geometrically and allowed to ride in their respective parent atoms; they were assigned appropriate isotropic thermal parameters and included in the structure-factor calculations. CCDC: 1442910-1442920 contains the supplementary crystallographic data for this paper. The data can be obtained free of charge from the Cambridge Crystallography Data Center via [www.ccdc.cam.ac.uk/data\\_request/cif](http://www.ccdc.cam.ac.uk/data_request/cif).

## Computational Methods

Gaussian 09 was used for all density functional theory (DFT) calculations including geometry optimization, frequency calculations, Natural bond orbital (NBO) analysis, nucleus-independent chemical-shift (NICS) calculations, estimation of the resonance stabilization energy (RSE), and mechanistic study.

Optimization, frequency calculations, NBO analysis, NICS calculation and RSE estimation were performed at the B3LYP/6-311+G(d,p) level of theory.

Mechanistic study for the formation of **3B**, **4**, **5a**, **6\***, **8**, **9** from **2** were performed at the B3LYP-D3(BJ)(SCRF)/6-311+G(d,p)//B3LYP/6-311+G(d,p) level (solvent = benzene) with and without dispersion force.



## Supplementary References

1. Sheldrick, G. M. SHELXL-97, Program for Crystal Structure Refinement; University of Göttingen: Göttingen, Germany, **1997**.
2. Bruker AXS SHELXTL, Madison, WI; SHELX-97G. M. Sheldrick, *Acta Crystallogr. A*, **2008**, *64*, 112–122, *SHELX-2013*, <http://shelx.uni-ac.gwdg.de/SHELX/index.php>.
